# Supplementary material for: Association mapping by aerial drone reveals 213 genetic associations for Sorghum bicolor biomass traits under drought
Source: BMC Genomics. 2018 Sep 17;19:679. doi: 10.1186/s12864-018-5055-5 (PMC6142696; doi:10.1186/s12864-018-5055-5)
Supplement: Supplementary file 4 — Summary of GWAS peaks identified using original trait data. (XLSX 137 kb) [file 12864_2018_5055_MOESM4_ESM.xlsx]

## Sheet: Table_S3_Final_peak_summary_by_
Summary of GWAS peaks identified using original trait data. SNP_ID = unique SNP identifier, amax = largest FDR corrected p-value (-log) found across all GWAS where the SNP passed the significance threshold, amin = smallest FDR corrected p-value (-log) found across all GWAS where the SNP passed the significance threshold, chrom = chromosome, hit_num = number of GWAS in which this SNP passed the si…
SNP_ID	amax	amin	chrom	hit_num	median	peak name	pos	traits	Locs	Dates	treatments	median_PVE	FT?
S01_909063	1.1	1.1	1	1	1.1	CPG1.1	909063	B65	KARE	2016-07-22	Preflower_during_recovery	4.47398
S01_909064	1.1	1.1	1	1	1.1	CPG1.1	909064	B65	KARE	2016-07-22	Preflower_during_recovery	4.47398
S01_995171	1.84	1.07	1	13	1.24	CPG1.1	995171	H_m, B65	WREC, KARE	2016-09-13, 2016-09-20, 2016-08-09, 2016-07-28, 2016-09-21, 2016-08-23, 2016-07-26, 2016-08-02, 2016-07-22	Postflower_during_stress, Postflower_no_stress, control, Preflower_during_recovery	15.1805
S01_996253	1.25	1.01	1	3	1.12	CPG1.1	996253	H_m, B65	WREC	2016-08-30, 2016-08-23	Preflower_during_recovery	12.1235
S01_1004215	1.7	1.23	1	2	1.46	CPG1.1	1004215	Bwet, B65	WREC	2016-08-16	Preflower_during_recovery	4.70031
S01_1496852	2.36	1.13	1	8	1.21	CPG1.2	1496852	H_m, B65	KARE, WREC	2016-08-11, 2016-09-01, 2016-09-13, 2016-08-25, 2016-09-06, 2016-08-18	Postflower_during_stress, control, Preflower_during_recovery	0.911091
S01_1496855	2.36	1.13	1	8	1.21	CPG1.2	1496855	H_m, B65	KARE, WREC	2016-08-11, 2016-09-01, 2016-09-13, 2016-08-25, 2016-09-06, 2016-08-18	Postflower_during_stress, control, Preflower_during_recovery	0.911091
S01_1496856	2.36	1.13	1	8	1.21	CPG1.2	1496856	H_m, B65	KARE, WREC	2016-08-11, 2016-09-01, 2016-09-13, 2016-08-25, 2016-09-06, 2016-08-18	Postflower_during_stress, control, Preflower_during_recovery	0.911091
S01_1496859	2.36	1.13	1	8	1.21	CPG1.2	1496859	H_m, B65	KARE, WREC	2016-08-11, 2016-09-01, 2016-09-13, 2016-08-25, 2016-09-06, 2016-08-18	Postflower_during_stress, control, Preflower_during_recovery	0.911091
S01_1503415	2.27	1.04	1	7	1.13	CPG1.2	1503415	H_m, B65	KARE, WREC	2016-08-18, 2016-08-11, 2016-09-01, 2016-08-25, 2016-09-13	Postflower_during_stress, control	0.651023
S01_1518810	1.36	1	1	4	1.18	CPG1.2	1518810	H_m, B65	WREC, KARE	2016-08-09, 2016-09-06, 2016-08-11	Postflower_during_stress, control, Preflower_during_recovery	1.34348
S01_1524103	1.14	1.01	1	4	1.03	CPG1.2	1524103	H_m, B65	WREC, KARE	2016-09-06, 2016-08-25, 2016-08-11	control, Preflower_during_recovery	1.38454
S01_1536750	2.59	1.01	1	4	1.4	CPG1.2	1536750	H_m, B65	WREC, KARE	2016-09-06, 2016-08-11	control, Preflower_during_recovery	0.747371
S01_2409069	2.17	1.1	1	3	1.92	CPG1.3	2409069	Bwet, B65	KARE	2016-07-22, 2016-07-28	Preflower_during_recovery	2.04297
S01_2417974	1.3	1.11	1	2	1.21	CPG1.3	2417974	B65	KARE	2016-07-22, 2016-07-28	Preflower_during_recovery	1.2133
S01_2466598	1.06	1.06	1	1	1.06	CPG1.3	2466598	B65	KARE	2016-07-22	Preflower_during_recovery	0.680492
S01_2469398	1.85	1.79	1	2	1.82	CPG1.3	2469398	H_m, B65	KARE, WREC	2016-08-30, 2016-08-11	Preflower_during_recovery	16.3252
S01_2482438	2.65	1	1	10	1.53	CPG1.3	2482438	Bwet, H_m, B65	KARE, WREC	2016-08-16, 2016-09-13, 2016-08-11, 2016-09-20, 2016-08-09, 2016-08-23, 2016-08-02, 2016-08-30	control, Preflower_during_recovery	15.5888
S01_2878523	1.16	1.16	1	1	1.16	CPG1.3	2878523	B65	WREC	2016-08-09	Postflower_during_stress	1.13883
S01_4144034	1.13	1.13	1	1	1.13	CPG1.4	4144034	Bwet	KARE	2016-09-01	Preflower_during_recovery	0.533575
S01_4162743	1.92	1.56	1	2	1.74	CPG1.4	4162743	B65	KARE	2016-07-22, 2016-07-28	Preflower_during_recovery	0.863215
S01_4206437	1.86	1.15	1	2	1.5	CPG1.4	4206437	B65	KARE	2016-07-22, 2016-07-28	Preflower_during_recovery	0.705986
S01_4224767	3.74	1	1	42	1.49	CPG1.4	4224767	Bwet, LAI, H_m, B65	KARE, WREC	2016-08-16, 2016-09-01, 2016-09-13, 2016-09-15, 2016-08-09, 2016-09-20, 2016-08-25, 2016-07-28, 2016-09-21, 2016-09-06, 2016-09-08, 2016-08-23, 2016-07-26, 2016-08-02, 2016-08-30, 2016-07-22	Postflower_during_stress, control, Preflower_during_recovery	1.80541
S01_4235582	1.02	1.02	1	1	1.02	CPG1.4	4235582	B65	KARE	2016-07-22	Preflower_during_recovery	0.426055
S01_4271938	1.59	1.39	1	2	1.49	CPG1.4	4271938	B65	KARE	2016-07-22, 2016-07-28	Preflower_during_recovery	0.578926
S01_4276045	1.61	1.39	1	2	1.5	CPG1.4	4276045	B65	KARE	2016-07-22, 2016-07-28	Preflower_during_recovery	0.882656
S01_4277338	1.01	1.01	1	1	1.01	CPG1.4	4277338	B65	KARE	2016-07-28	Preflower_during_recovery	0.623006
S01_4473605	1.88	1.88	1	1	1.88	CPG1.5	4473605	B65	KARE	2016-07-28	Preflower_during_recovery	0.234123
S01_4473606	1.88	1.88	1	1	1.88	CPG1.5	4473606	B65	KARE	2016-07-28	Preflower_during_recovery	0.234123
S01_4476977	1.56	1.56	1	1	1.56	CPG1.5	4476977	B65	KARE	2016-07-28	Preflower_during_recovery	0.144633
S01_10202723	2.53	1.15	1	5	1.36	CPG1.6	10202723	H_m	KARE, WREC	2016-08-09, 2016-08-18, 2016-08-11, 2016-07-26	Preflower_during_stress, Postflower_during_stress, control, Preflower_during_recovery	3.87435
S01_10248955	1.43	1.08	1	2	1.26	CPG1.6	10248955	B65	KARE, WREC	2016-08-16, 2016-07-28	Postflower_during_stress, control	1.14646
S01_10286885	1.22	1.1	1	4	1.11	CPG1.6	10286885	Bwet, LAI, B65	KARE	2016-07-07, 2016-07-22	Postflower_during_stress, Postflower_no_stress	0.664095
S01_12863128	1.18	1.02	1	5	1.09	CPG1.7	12863128	H_m, B65	KARE	2016-09-21, 2016-08-18, 2016-09-08	Postflower_during_stress, control	0.0244668
S01_12863271	1.27	1.09	1	3	1.17	CPG1.7	12863271	H_m, B65	WREC, KARE	2016-09-21, 2016-09-08, 2016-09-13	Postflower_during_stress, Preflower_during_recovery	0.0451019
S01_12922094	1.5	1.06	1	6	1.34	CPG1.7	12922094	H_m, B65	KARE	2016-09-21, 2016-08-18, 2016-08-25, 2016-09-08	Postflower_during_stress, control	0.0549015
S01_12934306	1.23	1.11	1	2	1.17	CPG1.7	12934306	Bwet, B65	WREC	2016-08-16, 2016-08-30	control, Preflower_during_recovery	1.60967
S01_14194490	2.83	1.13	1	12	1.38	CPG1.8	14194490	Bwet, H_m, B65	KARE, WREC	2016-08-16, 2016-08-02, 2016-08-23, 2016-08-18, 2016-08-11	Postflower_during_stress, control	3.47502
S01_14857135	2.29	1.02	1	10	1.28	CPG1.9	14857135	Bwet, H_m, B65	WREC	2016-08-16, 2016-08-09, 2016-08-23, 2016-07-26, 2016-08-02, 2016-07-22	Preflower_during_stress, Postflower_during_stress, Preflower_during_recovery	1.18328
S01_14865640	1.01	1.01	1	1	1.01	CPG1.9	14865640	H_m	KARE	2016-09-15	Postflower_during_stress	0.0471114
S01_15723990	2.13	1.06	1	4	1.89	CPG1.10	15723990	Bwet, B65	KARE	2016-09-01, 2016-08-11	Postflower_during_stress, control	4.547
S01_19638505	1.32	1.32	1	1	1.32	CPG1.11	19638505	B65	WREC	2016-08-16	control	0.983455
S01_19715095	1.68	1.03	1	2	1.35	CPG1.11	19715095	B65	KARE	2016-07-22, 2016-07-28	Preflower_during_recovery	7.31256
S01_19718122	1.37	1.02	1	5	1.15	CPG1.11	19718122	Bwet, B65	WREC	2016-09-20, 2016-09-06	Preflower_during_recovery	3.61265
S01_19800482	1.13	1.13	1	1	1.13	CPG1.11	19800482	B65	WREC	2016-08-09	control	2.35915
S01_19810144	1.07	1.07	1	1	1.07	CPG1.11	19810144	H_m	KARE	2016-08-11	Preflower_during_recovery	4.10288
S01_24826078	1.11	1.11	1	1	1.11	CPG1.12	24826078	B65	KARE	2016-07-22	Preflower_during_recovery	2.96949
S01_24943942	3.16	1.02	1	11	1.26	CPG1.12	24943942	Bwet, LAI, B65	WREC, KARE	2016-08-16, 2016-09-01, 2016-09-20, 2016-08-25, 2016-07-28, 2016-09-06, 2016-08-30	control, Preflower_during_recovery	6.82517
S01_24946697	3.42	1	1	18	1.33	CPG1.12	24946697	Bwet, LAI, H_m, B65	WREC, KARE	2016-08-16, 2016-08-11, 2016-09-01, 2016-09-20, 2016-08-09, 2016-08-25, 2016-09-06, 2016-08-23, 2016-08-30, 2016-07-22	Preflower_during_stress, control, Preflower_during_recovery	9.75222
S01_24946730	2.58	1	1	6	1.16	CPG1.12	24946730	Bwet, H_m, B65	WREC, KARE	2016-08-23, 2016-08-18, 2016-07-22, 2016-07-28	control, Preflower_during_recovery	10.6767
S01_24947346	2.57	1	1	11	1.19	CPG1.12	24947346	Bwet, LAI, H_m, B65	WREC, KARE	2016-08-16, 2016-09-01, 2016-09-20, 2016-08-25, 2016-09-21, 2016-08-23, 2016-08-30	Postflower_during_stress, control, Preflower_during_recovery	6.9349
S01_24972792	1.36	1.07	1	3	1.12	CPG1.12	24972792	Bwet, LAI, B65	WREC, KARE	2016-08-16, 2016-08-18	control, Preflower_during_recovery	6.21733
S01_24985904	3.75	1.03	1	12	1.74	CPG1.12	24985904	B65	WREC	2016-09-20	Preflower_during_recovery	4.90677
S01_26782061	6.4	1.03	1	12	1.52	CPG1.13	26782061	Bwet, LAI, H_m, B65	WREC, KARE	2016-08-16, 2016-09-13, 2016-09-15, 2016-09-20, 2016-07-28, 2016-09-06, 2016-08-18, 2016-08-23, 2016-08-30	control, Preflower_during_recovery	9.29532
S01_26820140	1.14	1.08	1	2	1.11	CPG1.13	26820140	H_m, B65	WREC	2016-09-06, 2016-08-23	Preflower_during_recovery	7.30527
S01_26844957	1.77	1.01	1	12	1.23	CPG1.13	26844957	Bwet, H_m, B65	WREC, KARE	2016-08-16, 2016-09-13, 2016-09-06, 2016-08-18, 2016-08-23, 2016-08-02, 2016-08-30	control, Preflower_during_recovery	6.11632
S01_26852625	2.06	1.04	1	8	1.1	CPG1.13	26852625	Bwet, LAI, H_m, B65	WREC, KARE	2016-08-09, 2016-08-11, 2016-08-25, 2016-08-23	control, Preflower_during_recovery	4.27939
S01_26855863	1.58	1.04	1	9	1.34	CPG1.13	26855863	Bwet, H_m, B65	KARE, WREC	2016-08-09, 2016-08-02, 2016-09-06, 2016-08-18, 2016-08-23	control, Preflower_during_recovery	7.15835
S01_26855867	1.58	1.04	1	9	1.34	CPG1.13	26855867	Bwet, H_m, B65	KARE, WREC	2016-08-09, 2016-08-02, 2016-09-06, 2016-08-18, 2016-08-23	control, Preflower_during_recovery	7.15835
S01_26855887	1.58	1.04	1	9	1.34	CPG1.13	26855887	Bwet, H_m, B65	KARE, WREC	2016-08-09, 2016-08-02, 2016-09-06, 2016-08-18, 2016-08-23	control, Preflower_during_recovery	7.15835
S01_51714405	1.19	1.19	1	1	1.19	CPG1.14	51714405	Bwet	KARE	2016-08-25	Preflower_during_recovery	1.36055
S01_51754610	1.41	1.41	1	1	1.41	CPG1.14	51754610	Bwet	KARE	2016-07-28	Preflower_during_recovery	0.173109
S01_51754792	1.45	1.45	1	1	1.45	CPG1.14	51754792	B65	WREC	2016-09-06	Preflower_during_recovery	1.84341
S01_51816883	5.15	1.09	1	38	1.7	CPG1.14	51816883	Bwet, LAI, H_m, B65	KARE, WREC	2016-08-16, 2016-09-01, 2016-09-13, 2016-09-15, 2016-09-20, 2016-08-09, 2016-08-11, 2016-08-25, 2016-07-28, 2016-09-21, 2016-09-06, 2016-08-18, 2016-09-08, 2016-08-23, 2016-07-26, 2016-08-02, 2016-07-22	Postflower_during_stress, Postflower_no_stress, control, Preflower_during_recovery	1.78776
S01_51822037	1.23	1.23	1	1	1.23	CPG1.14	51822037	H_m	WREC	2016-09-20	Preflower_during_recovery	3.15325
S01_51839532	1.31	1.31	1	1	1.31	CPG1.14	51839532	B65	WREC	2016-09-13	Preflower_during_recovery	0.920786
S01_54392250	4.08	1.27	1	4	1.73	CPG1.15	54392250	H_m	WREC	2016-09-20	Preflower_during_recovery	10.0363
S01_54392301	4.33	1.03	1	6	1.62	CPG1.15	54392301	H_m, B65	WREC	2016-09-20, 2016-08-30	Preflower_during_recovery	9.01055
S01_54392382	2.4	1.31	1	2	1.85	CPG1.15	54392382	H_m	WREC	2016-08-30	Preflower_during_recovery	4.08161
S01_54393178	4.08	1.27	1	4	1.73	CPG1.15	54393178	H_m	WREC	2016-09-20	Preflower_during_recovery	10.0363
S01_54463423	1.67	1.06	1	7	1.34	CPG1.15	54463423	Bwet, LAI, H_m, B65	WREC, KARE	2016-08-30, 2016-07-22, 2016-07-07, 2016-08-18, 2016-08-11	Postflower_during_stress, Postflower_no_stress, Preflower_during_recovery	2.44466
S01_56668625	1.22	1.22	1	1	1.22	CPG1.16	56668625	B65	KARE	2016-07-28	Preflower_during_recovery	0.0490557
S01_56751588	1.67	1.18	1	5	1.46	CPG1.16	56751588	Bwet, B65	WREC	2016-07-12, 2016-07-22, 2016-07-26	Preflower_during_stress	4.00014
S01_56854953	3.08	1.34	1	3	1.8	CPG1.16	56854953	Bwet, B65	WREC	2016-08-02, 2016-08-23	Preflower_during_recovery	6.09426
S01_57208004	1.05	1.04	1	2	1.05	CPG1.16	57208004	H_m, B65	WREC	2016-08-02, 2016-08-30	Preflower_during_recovery	4.52131
S01_57215311	2.62	1.14	1	5	1.56	CPG1.16	57215311	Bwet, B65	WREC	2016-08-09, 2016-08-02, 2016-08-23	Preflower_during_recovery	7.71097
S01_59995042	1.57	1.21	1	6	1.41	CPG1.17	59995042	H_m	WREC	2016-08-02	control	0.808725
S01_59995079	1.1	1.1	1	1	1.1	CPG1.17	59995079	H_m	WREC	2016-07-22	Postflower_no_stress	0.166023
S01_60813090	1.16	1.16	1	1	1.16	CPG1.18	60813090	B65	WREC	2016-09-06	Preflower_during_recovery	2.40221
S01_60916418	2.08	1	1	12	1.39	CPG1.18	60916418	H_m, B65	KARE, WREC	2016-09-01, 2016-09-13, 2016-09-20, 2016-08-09, 2016-07-28, 2016-09-06, 2016-08-18, 2016-09-08, 2016-08-23, 2016-08-30	Postflower_during_stress, control, Preflower_during_recovery	4.32998
S01_61002914	1.43	1.43	1	1	1.43	CPG1.18	61002914	B65	WREC	2016-08-16	Postflower_during_stress	0.744664
S01_63890913	1.23	1.23	1	1	1.23	CPG1.19	63890913	Bwet	WREC	2016-08-16	Preflower_during_recovery	0.777474
S01_64367943	1.01	1.01	1	1	1.01	CPG1.20	64367943	B65	WREC	2016-08-16	Postflower_during_stress	0.198046
S01_64482105	1.04	1.04	1	1	1.04	CPG1.20	64482105	B65	KARE	2016-07-22	Preflower_during_recovery	4.01564
S01_64789256	1.06	1.06	1	1	1.06	CPG1.20	64789256	B65	WREC	2016-08-09	Postflower_during_stress	4.84861
S01_64792352	2.57	1	1	31	1.36	CPG1.20	64792352	Bwet, H_m, B65	KARE, WREC	2016-08-16, 2016-09-13, 2016-09-01, 2016-09-20, 2016-08-09, 2016-08-25, 2016-09-06, 2016-08-23, 2016-07-26, 2016-08-02, 2016-08-30, 2016-07-22	Postflower_during_stress, control, Preflower_during_recovery	4.23471
S01_64798666	2.27	1.1	1	3	1.56	CPG1.20	64798666	H_m, B65	WREC, KARE	2016-08-09, 2016-08-25, 2016-07-22	Postflower_during_stress, control	4.70627
S01_65020073	1.32	1.32	1	1	1.32	CPG1.20	65020073	B65	WREC	2016-08-30	Preflower_during_recovery	2.5623
S01_67199905	1.64	1.08	1	6	1.28	CPG1.21	67199905	Bwet, H_m, B65	KARE, WREC	2016-08-16, 2016-08-09, 2016-08-11, 2016-08-30, 2016-08-23	Preflower_during_recovery	6.28784
S01_67236037	1.02	1.02	1	1	1.02	CPG1.21	67236037	B65	WREC	2016-08-16	Preflower_during_recovery	1.87924
S01_67315541	1.27	1.27	1	1	1.27	CPG1.21	67315541	B65	KARE	2016-07-28	Preflower_during_recovery	0.749145
S01_68304142	1.43	1.17	1	6	1.37	CPG1.22	68304142	Bwet, LAI, B65	KARE	2016-07-14, 2016-07-07, 2016-07-22	Preflower_during_stress, Preflower_during_recovery	2.97784
S01_68305238	1.12	1.12	1	1	1.12	CPG1.22	68305238	Bwet	WREC	2016-08-30	Preflower_during_recovery	3.9275
S01_69392141	1.91	1.06	1	2	1.48	CPG1.23	69392141	B65	KARE	2016-07-22, 2016-07-28	Preflower_during_recovery	3.18045
S01_69392219	2.23	1.18	1	3	1.39	CPG1.23	69392219	Bwet, B65	KARE	2016-07-22, 2016-07-28	Preflower_during_recovery	2.26283
S01_69392279	1.92	1.06	1	2	1.49	CPG1.23	69392279	B65	KARE	2016-07-22, 2016-07-28	Preflower_during_recovery	2.70393
S01_69440384	1.55	1.33	1	2	1.44	CPG1.23	69440384	Bwet, B65	KARE	2016-07-28	Preflower_during_recovery	3.19972
S01_69507290	3.71	1.53	1	3	1.99	CPG1.23	69507290	Bwet, B65	KARE	2016-07-22, 2016-07-28	Preflower_during_recovery	4.32523
S01_69647330	1.11	1.11	1	1	1.11	CPG1.24	69647330	H_m	KARE	2016-08-11	Preflower_during_recovery	1.19594
S01_69647952	1.01	1.01	1	1	1.01	CPG1.24	69647952	B65	KARE	2016-07-22	Preflower_during_recovery	1.91845
S01_69647992	2.39	1.31	1	2	1.85	CPG1.24	69647992	Bwet, B65	KARE	2016-07-22	Preflower_during_recovery	2.5742
S01_69679821	3.27	1.1	1	4	2.02	CPG1.24	69679821	Bwet, B65	KARE	2016-07-22, 2016-07-28	Preflower_during_recovery	4.2929
S01_70321212	2.6	2.6	1	1	2.6	CPG1.25	70321212	B65	KARE	2016-07-28	Preflower_during_recovery	9.16046
S01_70321236	2.95	1.04	1	2	2	CPG1.25	70321236	B65	KARE	2016-07-22, 2016-07-28	Preflower_during_recovery	7.39123
S01_70324878	3.85	1.51	1	3	1.58	CPG1.25	70324878	Bwet, B65	KARE	2016-07-22, 2016-07-28	Preflower_during_recovery	5.05243
S01_70352990	1.66	1.28	1	2	1.47	CPG1.25	70352990	B65	KARE	2016-07-22, 2016-07-28	Preflower_during_recovery	3.10047
S01_70368793	3.26	1.51	1	3	1.89	CPG1.25	70368793	Bwet, B65	KARE	2016-07-22, 2016-07-28	Preflower_during_recovery	4.9788
S01_70368862	2.35	1.92	1	2	2.14	CPG1.25	70368862	B65	KARE	2016-07-22, 2016-07-28	Preflower_during_recovery	6.28946
S01_70383268	2.69	1.11	1	6	1.89	CPG1.25	70383268	Bwet, H_m, B65	KARE, WREC	2016-09-20, 2016-07-22, 2016-08-23, 2016-07-28	Preflower_during_recovery	6.74878
S01_70388220	3.23	1.18	1	4	2.05	CPG1.25	70388220	Bwet, B65	KARE	2016-07-22, 2016-07-28	Preflower_during_recovery	4.3328
S01_71574631	2.66	1.78	1	2	2.22	CPG1.26	71574631	B65	KARE	2016-07-22, 2016-07-28	Preflower_during_recovery	2.84866
S01_71637141	1.55	1.04	1	7	1.2	CPG1.26	71637141	Bwet, H_m, B65	KARE, WREC	2016-08-16, 2016-09-01, 2016-08-30, 2016-08-11	Postflower_during_stress, control, Preflower_during_recovery	8.03233
S01_71767476	1.43	1.23	1	2	1.33	CPG1.26	71767476	Bwet, B65	WREC	2016-08-09	control	3.45101
S01_72327235	1.46	1.02	1	12	1.12	CPG1.27	72327235	Bwet, LAI, H_m, B65	WREC, KARE	2016-08-16, 2016-07-07, 2016-09-01, 2016-09-21, 2016-09-06, 2016-07-12, 2016-08-23, 2016-07-22	Postflower_during_stress, Postflower_no_stress, control, Preflower_during_recovery	8.92023
S01_72327271	1.46	1.02	1	12	1.12	CPG1.27	72327271	Bwet, LAI, H_m, B65	WREC, KARE	2016-08-16, 2016-07-07, 2016-09-01, 2016-09-21, 2016-09-06, 2016-07-12, 2016-08-23, 2016-07-22	Postflower_during_stress, Postflower_no_stress, control, Preflower_during_recovery	8.92023
S01_72731688	1.16	1.16	1	1	1.16	CPG1.27	72731688	Bwet	WREC	2016-08-23	Preflower_during_recovery	3.75013
S01_72731704	1.16	1.16	1	1	1.16	CPG1.27	72731704	Bwet	WREC	2016-08-23	Preflower_during_recovery	3.75013
S01_77148881	1.02	1.02	1	1	1.02	CPG1.28	77148881	B65	KARE	2016-07-22	Preflower_during_recovery	3.80419
S01_77148904	1.02	1.02	1	1	1.02	CPG1.28	77148904	B65	KARE	2016-07-22	Preflower_during_recovery	3.80419
S01_77149434	2.04	1.21	1	2	1.63	CPG1.28	77149434	B65	KARE	2016-07-22, 2016-07-28	Preflower_during_recovery	6.37299
S01_77161005	1.4	1.06	1	2	1.23	CPG1.28	77161005	Bwet, B65	WREC	2016-08-16	Postflower_during_stress	1.01578
S01_77209436	1.16	1.09	1	3	1.09	CPG1.28	77209436	H_m, B65	KARE	2016-09-21, 2016-09-15, 2016-07-22	Postflower_during_stress	1.7424
S01_77414107	1.07	1.04	1	2	1.05	CPG1.29	77414107	Bwet, B65	KARE	2016-07-28	control	5.64621
S01_77592033	2.01	1.21	1	4	1.78	CPG1.29	77592033	H_m, B65	KARE	2016-09-21, 2016-09-15, 2016-09-08, 2016-07-22	Postflower_during_stress	0.297477
S01_77592097	1.63	1.12	1	4	1.19	CPG1.29	77592097	Bwet, H_m, B65	KARE, WREC	2016-09-15, 2016-09-08, 2016-09-13	Postflower_during_stress, Preflower_during_recovery	1.26657
S01_77592102	1.63	1.12	1	4	1.19	CPG1.29	77592102	Bwet, H_m, B65	KARE, WREC	2016-09-15, 2016-09-08, 2016-09-13	Postflower_during_stress, Preflower_during_recovery	1.26657
S01_77841666	1.06	1.06	1	1	1.06	CPG1.29	77841666	B65	WREC	2016-08-23	Preflower_during_recovery	2.61419
S01_77958402	3.49	1.08	1	20	1.35	CPG1.29	77958402	Bwet, LAI, H_m, B65	WREC, KARE	2016-09-13, 2016-09-15, 2016-08-09, 2016-07-28, 2016-09-21, 2016-08-18, 2016-09-08, 2016-07-26, 2016-07-14, 2016-07-22	Postflower_during_stress, Postflower_no_stress, control, Preflower_during_recovery	10.9818
S01_78517662	1.46	1.26	1	2	1.36	CPG1.30	78517662	H_m, B65	WREC	2016-08-16, 2016-08-23	Preflower_during_recovery	5.40228
S01_78741849	1.64	1.64	1	1	1.64	CPG1.31	78741849	H_m	WREC	2016-08-30	Preflower_during_recovery	3.07787
S01_78830737	1.97	1.12	1	8	1.23	CPG1.31	78830737	Bwet, H_m, B65	WREC, KARE	2016-09-15, 2016-08-09, 2016-08-16, 2016-09-08, 2016-09-01	control	1.33593
S01_78888552	1.7	1.7	1	1	1.7	CPG1.31	78888552	Bwet	KARE	2016-08-11	Postflower_during_stress	4.63988
S01_78890887	2.11	2.11	1	1	2.11	CPG1.31	78890887	B65	WREC	2016-08-09	control	3.08698
S01_78894165	2.07	1.06	1	4	1.1	CPG1.31	78894165	H_m, B65	WREC, KARE	2016-09-21, 2016-08-09, 2016-08-16, 2016-09-06	Postflower_during_stress, control	1.65269
S01_78894192	2.07	1.06	1	4	1.1	CPG1.31	78894192	H_m, B65	WREC, KARE	2016-09-21, 2016-08-09, 2016-08-16, 2016-09-06	Postflower_during_stress, control	1.65269
S01_78894228	2.07	1.06	1	4	1.1	CPG1.31	78894228	H_m, B65	WREC, KARE	2016-09-21, 2016-08-09, 2016-08-16, 2016-09-06	Postflower_during_stress, control	1.65269
S01_78894281	2.07	1.06	1	4	1.1	CPG1.31	78894281	H_m, B65	WREC, KARE	2016-09-21, 2016-08-09, 2016-08-16, 2016-09-06	Postflower_during_stress, control	1.65269
S01_78894441	1.46	1.46	1	1	1.46	CPG1.31	78894441	B65	WREC	2016-08-09	control	2.23614
S01_78894969	1.58	1.02	1	3	1.37	CPG1.31	78894969	Bwet, B65	WREC, KARE	2016-09-21, 2016-08-23, 2016-08-11	Postflower_during_stress, Preflower_during_recovery	5.98084
S01_78970651	1.19	1.19	1	1	1.19	CPG1.31	78970651	B65	WREC	2016-08-23	Preflower_during_recovery	9.37796
S02_628632	1.76297	1.14504	2	2	1.454	CPG2.1	628632	H_m	WREC	2016-08-16	Preflower_during_recovery	7.11985
S02_771247	2.2207	1.0045	2	12	1.20913	CPG2.1	771247	Bwet, H_m, B65	WREC, KARE	2016-09-01, 2016-08-09, 2016-08-25, 2016-09-21, 2016-08-18, 2016-08-02, 2016-08-30, 2016-07-22	Postflower_during_stress, Postflower_no_stress, control, Preflower_during_recovery	6.05451
S02_854046	2.83413	1.01074	2	24	1.58212	CPG2.1	854046	Bwet, H_m, B65	KARE, WREC	2016-08-11, 2016-08-09, 2016-08-18, 2016-08-23, 2016-07-26, 2016-08-02, 2016-08-30, 2016-07-22	Postflower_during_stress, Preflower_during_stress, Postflower_no_stress, control, Preflower_during_recovery	6.97528
S02_905364	1.10575	1.02684	2	2	1.0663	CPG2.1	905364	H_m	WREC, KARE	2016-08-18, 2016-09-13	control	2.45444
S02_3901109	1.41776	1.41776	2	1	1.41776	CPG2.2	3901109	Bwet	KARE	2016-09-21	control	0.837888
S02_3916284	1.74095	1.00551	2	11	1.24857	CPG2.2	3916284	Bwet, H_m, B65	KARE, WREC	2016-09-21, 2016-09-20, 2016-09-13	control, Preflower_during_recovery	1.95054
S02_3917210	1.00285	1.00285	2	1	1.00285	CPG2.2	3917210	B65	WREC	2016-09-13	Preflower_during_recovery	1.45745
S02_12686988	1.25106	1.01784	2	6	1.10417	CPG2.3	12686988	Bwet, H_m, B65	WREC, KARE	2016-09-15, 2016-09-06, 2016-09-21, 2016-09-13	control	0.56352
S02_12686995	1.25106	1.01784	2	6	1.10417	CPG2.3	12686995	Bwet, H_m, B65	WREC, KARE	2016-09-15, 2016-09-06, 2016-09-21, 2016-09-13	control	0.56352
S02_12687026	1.2992	1.00571	2	2	1.15246	CPG2.3	12687026	Bwet, H_m	WREC	2016-09-20, 2016-08-23	Preflower_during_recovery	1.53749
S02_12687911	1.37719	1.00342	2	5	1.09847	CPG2.3	12687911	Bwet, H_m, B65	WREC	2016-08-09, 2016-09-20, 2016-09-06, 2016-08-30	Preflower_during_recovery	3.22021
S02_12687920	1.37719	1.00342	2	5	1.09847	CPG2.3	12687920	Bwet, H_m, B65	WREC	2016-08-09, 2016-09-20, 2016-09-06, 2016-08-30	Preflower_during_recovery	3.22021
S02_12687932	1.37719	1.00342	2	5	1.09847	CPG2.3	12687932	Bwet, H_m, B65	WREC	2016-08-09, 2016-09-20, 2016-09-06, 2016-08-30	Preflower_during_recovery	3.22021
S02_12688054	1.69986	1.03785	2	8	1.24719	CPG2.3	12688054	Bwet, H_m, B65	WREC	2016-08-09, 2016-09-20, 2016-09-06, 2016-08-30, 2016-08-23	Preflower_during_recovery	3.78946
S02_51131939	1.16691	1.16691	2	1	1.16691	CPG2.4	51131939	B65	KARE	2016-07-22	Postflower_during_stress	1.50732
S02_51236564	1.00033	1.00033	2	1	1.00033	CPG2.4	51236564	Bwet	WREC	2016-08-30	Preflower_during_recovery	0.0299548
S02_59247349	1.40818	1.40818	2	1	1.40818	CPG2.5	59247349	Bwet	KARE	2016-08-11	Postflower_during_stress	1.10501
S02_67393662	1.29229	1.29229	2	1	1.29229	CPG2.6	67393662	Bwet	WREC	2016-08-09	control	1.67285
S02_67407437	1.40282	1.36583	2	2	1.38433	CPG2.6	67407437	B65	KARE	2016-07-22, 2016-07-28	Preflower_during_recovery	1.4287
S02_67437145	1.6245	1.02483	2	6	1.29978	CPG2.6	67437145	H_m, B65	WREC	2016-09-06, 2016-08-30, 2016-09-13	control, Preflower_during_recovery	5.40025
S02_67842675	1.06784	1.06784	2	1	1.06784	CPG2.6	67842675	H_m	KARE	2016-08-11	Preflower_during_recovery	8.58949
S02_67842705	1.06784	1.06784	2	1	1.06784	CPG2.6	67842705	H_m	KARE	2016-08-11	Preflower_during_recovery	8.58949
S02_67895008	3.06493	1.14316	2	9	1.30459	CPG2.6	67895008	Bwet, B65	WREC	2016-09-13	Postflower_during_stress	0.628336
S02_67911417	2.83587	1.20029	2	5	1.76662	CPG2.6	67911417	B65	WREC	2016-09-13	Postflower_during_stress	0.508892
S02_68021867	1.0808	1.06417	2	2	1.07248	CPG2.7	68021867	H_m	KARE	2016-08-18, 2016-08-11	control	4.75921
S02_68021941	1.33732	1.33732	2	1	1.33732	CPG2.7	68021941	B65	WREC	2016-09-13	Preflower_during_recovery	7.72043
S02_68053484	1.1917	1.1794	2	2	1.18555	CPG2.7	68053484	H_m, B65	KARE, WREC	2016-08-16, 2016-09-01	control, Preflower_during_recovery	6.98387
S02_69395023	1.29259	1.29259	2	1	1.29259	CPG2.8	69395023	H_m	WREC	2016-08-16	Postflower_during_stress	3.23448
S02_69487206	1.07602	1.07602	2	1	1.07602	CPG2.8	69487206	Bwet	WREC	2016-08-23	Preflower_during_recovery	3.16722
S02_69541455	5.17985	1.08	2	6	1.67994	CPG2.8	69541455	Bwet, H_m, B65	KARE, WREC	2016-08-02, 2016-08-11, 2016-08-23	Preflower_during_recovery	10.6691
S02_69596908	1.2586	1.2586	2	1	1.2586	CPG2.8	69596908	H_m	WREC	2016-07-26	Postflower_no_stress	0.909537
S02_69646823	2.81895	1.07169	2	7	1.61794	CPG2.8	69646823	Bwet, B65	WREC	2016-08-16, 2016-09-20, 2016-09-06, 2016-08-30, 2016-09-13	control, Preflower_during_recovery	8.44509
S02_70827637	2.42453	1.05803	2	22	1.23481	CPG2.9	70827637	Bwet, LAI, H_m, B65	WREC, KARE	2016-08-16, 2016-09-01, 2016-08-09, 2016-09-20, 2016-08-25, 2016-07-28, 2016-09-21, 2016-09-06, 2016-08-18, 2016-07-12, 2016-08-23, 2016-08-30, 2016-07-22	Postflower_during_stress, control, Preflower_during_recovery	9.74315
S02_72127373	3.71599	1.00641	2	47	1.4171	CPG2.10	72127373	Bwet, LAI, H_m, B65	WREC, KARE	2016-08-16, 2016-08-02, 2016-09-13, 2016-09-01, 2016-09-15, 2016-08-09, 2016-09-20, 2016-08-25, 2016-07-28, 2016-09-21, 2016-09-06, 2016-08-18, 2016-09-08, 2016-08-23, 2016-07-26, 2016-07-12, 2016-07-14, 2016-08-30, 2016-07-22	Postflower_during_stress, Postflower_no_stress, Preflower_during_stress, control, Preflower_during_recovery	9.67033
S02_72127375	3.71599	1.00641	2	47	1.4171	CPG2.10	72127375	Bwet, LAI, H_m, B65	WREC, KARE	2016-08-16, 2016-08-02, 2016-09-13, 2016-09-01, 2016-09-15, 2016-08-09, 2016-09-20, 2016-08-25, 2016-07-28, 2016-09-21, 2016-09-06, 2016-08-18, 2016-09-08, 2016-08-23, 2016-07-26, 2016-07-12, 2016-07-14, 2016-08-30, 2016-07-22	Postflower_during_stress, Postflower_no_stress, Preflower_during_stress, control, Preflower_during_recovery	9.67033
S02_72127904	2.22537	1.04592	2	30	1.37481	CPG2.10	72127904	Bwet, LAI, H_m, B65	KARE, WREC	2016-08-16, 2016-09-13, 2016-09-01, 2016-09-15, 2016-09-20, 2016-08-09, 2016-09-21, 2016-09-06, 2016-08-18, 2016-09-08, 2016-08-23, 2016-07-26, 2016-08-30, 2016-07-22	Postflower_during_stress, control, Preflower_during_recovery	6.71157
S02_72144495	1.01406	1.01406	2	1	1.01406	CPG2.10	72144495	H_m	KARE	2016-09-08	Postflower_during_stress	0.105927
S02_72227101	1.06234	1.04364	2	2	1.05299	CPG2.10	72227101	Bwet, B65	KARE	2016-07-07	Postflower_no_stress	6.14618
S02_72232273	2.47831	1.02109	2	8	1.60211	CPG2.10	72232273	H_m, B65	KARE	2016-09-01, 2016-09-15, 2016-09-21, 2016-08-18, 2016-09-08, 2016-07-22	Postflower_during_stress	0.162642
S02_72247207	1.3725	1.02155	2	6	1.06328	CPG2.10	72247207	Bwet, LAI, B65	WREC	2016-08-16, 2016-09-06, 2016-08-30, 2016-07-26	Preflower_during_stress, control, Preflower_during_recovery	5.16622
S02_73190522	1.12302	1.12302	2	1	1.12302	CPG2.11	73190522	B65	WREC	2016-09-13	Preflower_during_recovery	1.07148
S02_73193875	1.15264	1.15264	2	1	1.15264	CPG2.11	73193875	B65	KARE	2016-08-25	control	5.73776
S02_73193888	1.15264	1.15264	2	1	1.15264	CPG2.11	73193888	B65	KARE	2016-08-25	control	5.73776
S02_73246476	2.45944	1.60096	2	5	2.29673	CPG2.11	73246476	Bwet, B65	KARE	2016-08-11	control	0.81091
S02_73301998	2.8987	1.00714	2	11	1.38455	CPG2.11	73301998	Bwet, LAI, H_m, B65	WREC, KARE	2016-09-15, 2016-07-28, 2016-09-21, 2016-09-06, 2016-08-23, 2016-07-26, 2016-07-22	Postflower_during_stress, Postflower_no_stress, control, Preflower_during_recovery	7.2317
S02_73302000	2.8987	1.00714	2	11	1.38455	CPG2.11	73302000	Bwet, LAI, H_m, B65	WREC, KARE	2016-09-15, 2016-07-28, 2016-09-21, 2016-09-06, 2016-08-23, 2016-07-26, 2016-07-22	Postflower_during_stress, Postflower_no_stress, control, Preflower_during_recovery	7.2317
S02_73315913	2.66956	1.03034	2	25	1.60646	CPG2.11	73315913	Bwet, LAI, H_m, B65	KARE, WREC	2016-07-07, 2016-09-15, 2016-09-20, 2016-08-09, 2016-08-25, 2016-07-28, 2016-09-21, 2016-09-06, 2016-08-18, 2016-07-12, 2016-09-08, 2016-07-14, 2016-07-22	Postflower_during_stress, Postflower_no_stress, control, Preflower_during_recovery	9.28899
S02_73315993	2.29449	1.00342	2	21	1.43345	CPG2.11	73315993	Bwet, LAI, H_m, B65	WREC, KARE	2016-07-07, 2016-09-15, 2016-09-20, 2016-08-09, 2016-08-25, 2016-07-28, 2016-09-21, 2016-09-06, 2016-08-18, 2016-09-08, 2016-07-12, 2016-07-22	Postflower_during_stress, Postflower_no_stress, control, Preflower_during_recovery	9.2844
S02_73315998	2.29449	1.00342	2	21	1.43345	CPG2.11	73315998	Bwet, LAI, H_m, B65	WREC, KARE	2016-07-07, 2016-09-15, 2016-09-20, 2016-08-09, 2016-08-25, 2016-07-28, 2016-09-21, 2016-09-06, 2016-08-18, 2016-09-08, 2016-07-12, 2016-07-22	Postflower_during_stress, Postflower_no_stress, control, Preflower_during_recovery	9.2844
S02_73391353	1.30563	1.30563	2	1	1.30563	CPG2.11	73391353	B65	KARE	2016-09-01	Preflower_during_recovery	4.48834
S02_73484430	1.60601	1.031	2	7	1.2189	CPG2.11	73484430	Bwet, H_m, B65	WREC, KARE	2016-08-30, 2016-08-18, 2016-08-23	control, Preflower_during_recovery	10.9602
S02_73484452	1.60601	1.031	2	7	1.2189	CPG2.11	73484452	Bwet, H_m, B65	WREC, KARE	2016-08-30, 2016-08-18, 2016-08-23	control, Preflower_during_recovery	10.9602
S02_75164268	1.26645	1.12047	2	2	1.19346	CPG2.12	75164268	H_m	KARE	2016-09-21, 2016-09-15	Preflower_during_recovery	2.41022
S02_76427244	1.44282	1.17859	2	2	1.31071	CPG2.13	76427244	H_m	WREC	2016-08-30, 2016-08-23	Postflower_during_stress	0.00744786
S02_76430677	1.47666	1.07789	2	6	1.29442	CPG2.13	76430677	H_m, B65	KARE, WREC	2016-09-21, 2016-09-15, 2016-09-08, 2016-08-23, 2016-07-26	Postflower_during_stress, Postflower_no_stress	0.551514
S02_76430735	1.77584	1.00084	2	5	1.09936	CPG2.13	76430735	H_m	KARE, WREC	2016-08-02, 2016-08-23, 2016-09-08, 2016-07-22, 2016-07-26	Postflower_during_stress, Postflower_no_stress	0.120159
S02_76430738	1.77584	1.00084	2	5	1.09936	CPG2.13	76430738	H_m	KARE, WREC	2016-08-02, 2016-08-23, 2016-09-08, 2016-07-22, 2016-07-26	Postflower_during_stress, Postflower_no_stress	0.120159
S02_76458767	1.56033	1.10291	2	5	1.18927	CPG2.13	76458767	H_m, B65	WREC, KARE	2016-09-13, 2016-07-28, 2016-07-22, 2016-07-26	Postflower_no_stress, control, Preflower_during_recovery	2.33277
S03_30854	1.4632	1.43816	3	2	1.45068	CPG3.1	30854	H_m, B65	KARE, WREC	2016-09-21, 2016-08-30	Postflower_during_stress, Preflower_during_recovery	6.06273
S03_31120	1.36491	1.36491	3	1	1.36491	CPG3.1	31120	B65	KARE	2016-09-21	Postflower_during_stress	3.94231
S03_31138	1.36491	1.36491	3	1	1.36491	CPG3.1	31138	B65	KARE	2016-09-21	Postflower_during_stress	3.94231
S03_41138	4.67447	1.04366	3	66	1.74705	CPG3.1	41138	Bwet, LAI, H_m, B65	KARE, WREC	2016-09-13, 2016-09-01, 2016-09-15, 2016-08-09, 2016-08-11, 2016-08-25, 2016-07-28, 2016-09-21, 2016-09-06, 2016-08-18, 2016-07-12, 2016-09-08, 2016-07-26, 2016-08-23, 2016-08-02, 2016-08-30, 2016-07-22	Postflower_during_stress, Preflower_during_stress, Postflower_no_stress, control, Preflower_during_recovery	9.30216
S03_67853	2.07358	1.054	3	6	1.26835	CPG3.1	67853	Bwet, H_m, B65	WREC, KARE	2016-09-13, 2016-08-18, 2016-08-25, 2016-07-22	control, Preflower_during_recovery	8.83384
S03_68230	1.29399	1.00496	3	3	1.28289	CPG3.1	68230	Bwet, B65	WREC, KARE	2016-08-18, 2016-09-13	control, Preflower_during_recovery	4.97078
S03_68241	1.29399	1.00496	3	3	1.28289	CPG3.1	68241	Bwet, B65	WREC, KARE	2016-08-18, 2016-09-13	control, Preflower_during_recovery	4.97078
S03_117023	2.07358	1.054	3	6	1.26835	CPG3.1	117023	Bwet, H_m, B65	WREC, KARE	2016-09-13, 2016-08-18, 2016-08-25, 2016-07-22	control, Preflower_during_recovery	8.83384
S03_132229	2.07358	1.054	3	6	1.26835	CPG3.1	132229	Bwet, H_m, B65	WREC, KARE	2016-09-13, 2016-08-18, 2016-08-25, 2016-07-22	control, Preflower_during_recovery	8.83384
S03_133554	5.77621	1.01981	3	52	1.67954	CPG3.1	133554	Bwet, LAI, H_m, B65	KARE, WREC	2016-09-01, 2016-09-13, 2016-09-15, 2016-09-20, 2016-08-25, 2016-07-28, 2016-09-21, 2016-09-06, 2016-08-18, 2016-09-08, 2016-08-23, 2016-07-26, 2016-08-02, 2016-08-30, 2016-07-22	Postflower_during_stress, Postflower_no_stress, control, Preflower_during_recovery	10.3495
S03_2512831	2.12635	1.01243	3	4	1.67337	CPG3.2	2512831	B65	WREC, KARE	2016-09-13, 2016-08-11	control, Preflower_during_recovery	1.82926
S03_2573166	1.76478	1.76478	3	1	1.76478	CPG3.2	2573166	Bwet	WREC	2016-08-30	Preflower_during_recovery	3.94093
S03_2580956	3.15778	1.0038	3	22	1.52322	CPG3.2	2580956	Bwet, H_m, B65	KARE, WREC	2016-08-16, 2016-09-01, 2016-09-13, 2016-09-15, 2016-08-25, 2016-09-21, 2016-09-06, 2016-08-18, 2016-09-08, 2016-08-02, 2016-07-22	Postflower_during_stress, control, Preflower_during_recovery	5.48947
S03_4349411	1.11068	1.11068	3	1	1.11068	CPG3.3	4349411	B65	WREC	2016-08-09	control	1.82608
S03_4349433	1.11068	1.11068	3	1	1.11068	CPG3.3	4349433	B65	WREC	2016-08-09	control	1.82608
S03_4349443	1.11068	1.11068	3	1	1.11068	CPG3.3	4349443	B65	WREC	2016-08-09	control	1.82608
S03_4440374	2.0757	1.02705	3	25	1.27314	CPG3.4	4440374	Bwet, LAI, H_m, B65	WREC, KARE	2016-08-16, 2016-09-01, 2016-08-11, 2016-09-15, 2016-08-09, 2016-09-20, 2016-09-21, 2016-09-06, 2016-08-18, 2016-09-08, 2016-07-12, 2016-07-26, 2016-08-30, 2016-07-22	Preflower_during_stress, Postflower_no_stress, Postflower_during_stress, control, Preflower_during_recovery	8.52003
S03_4449213	1.31696	1.15424	3	2	1.2356	CPG3.4	4449213	H_m	WREC	2016-08-09, 2016-08-23	Preflower_during_recovery	3.0129
S03_4449246	1.2942	1.15424	3	2	1.22422	CPG3.4	4449246	H_m	WREC	2016-08-09, 2016-08-23	Preflower_during_recovery	2.99292
S03_4449730	1.39713	1.0267	3	11	1.19694	CPG3.4	4449730	Bwet, H_m, B65	KARE, WREC	2016-09-15, 2016-08-09, 2016-09-20, 2016-09-21, 2016-09-06, 2016-08-23, 2016-07-26, 2016-08-02, 2016-08-30	Preflower_during_stress, control, Preflower_during_recovery	3.84022
S03_4879789	2.37683	1.01054	3	5	1.22535	CPG3.5	4879789	H_m, B65	WREC	2016-08-30, 2016-08-23	Preflower_during_recovery	7.82136
S03_4891503	1.05521	1.05521	3	1	1.05521	CPG3.5	4891503	B65	KARE	2016-07-22	Preflower_during_recovery	2.04
S03_5793786	1.25189	1.07392	3	2	1.16291	CPG3.6	5793786	LAI	WREC	2016-08-16, 2016-08-23	Preflower_during_recovery	6.47498
S03_5798006	1.02155	1.02155	3	1	1.02155	CPG3.6	5798006	B65	WREC	2016-08-16	Preflower_during_recovery	2.66183
S03_5912855	1.31888	1.012	3	2	1.16544	CPG3.6	5912855	Bwet, B65	WREC	2016-08-02, 2016-08-23	Preflower_during_recovery	1.73293
S03_6034890	2.81754	1.03193	3	10	1.20092	CPG3.7	6034890	Bwet, H_m, B65	KARE, WREC	2016-08-11, 2016-09-13, 2016-09-15, 2016-08-09, 2016-09-21, 2016-08-30	Postflower_during_stress, control, Preflower_during_recovery	1.23104
S03_6141818	3.13502	1.02051	3	35	1.37992	CPG3.7	6141818	Bwet, LAI, H_m, B65	WREC, KARE	2016-07-14, 2016-09-13, 2016-09-15, 2016-08-09, 2016-08-25, 2016-07-28, 2016-09-21, 2016-09-06, 2016-08-18, 2016-09-08, 2016-07-12, 2016-07-26, 2016-08-23, 2016-08-02, 2016-08-30, 2016-07-22	Postflower_during_stress, Postflower_no_stress, control, Preflower_during_recovery	9.9259
S03_6142566	1.22015	1.22015	3	1	1.22015	CPG3.7	6142566	B65	WREC	2016-07-12	control	4.76651
S03_6173722	1.68549	1.11878	3	2	1.40214	CPG3.7	6173722	H_m	KARE	2016-07-22, 2016-07-28	control	5.50553
S03_6173724	1.68549	1.11878	3	2	1.40214	CPG3.7	6173724	H_m	KARE	2016-07-22, 2016-07-28	control	5.50553
S03_6173725	1.68549	1.11878	3	2	1.40214	CPG3.7	6173725	H_m	KARE	2016-07-22, 2016-07-28	control	5.50553
S03_6180983	1.11601	1.06311	3	2	1.08956	CPG3.7	6180983	H_m	KARE	2016-07-22, 2016-07-28	control	2.55897
S03_6180998	1.11601	1.06311	3	2	1.08956	CPG3.7	6180998	H_m	KARE	2016-07-22, 2016-07-28	control	2.55897
S03_6180999	1.11601	1.06311	3	2	1.08956	CPG3.7	6180999	H_m	KARE	2016-07-22, 2016-07-28	control	2.55897
S03_6929315	2.5009	1.00048	3	10	1.32035	CPG3.8	6929315	Bwet, LAI, H_m, B65	WREC	2016-08-16, 2016-08-09, 2016-07-12, 2016-08-23, 2016-07-26, 2016-07-22	Preflower_during_stress, Preflower_during_recovery	6.31121
S03_8662781	1.07392	1.07392	3	1	1.07392	CPG3.9	8662781	LAI	WREC	2016-08-16	Preflower_during_recovery	4.16776
S03_8677855	1.95012	1.02405	3	8	1.14287	CPG3.9	8677855	Bwet, H_m, B65	KARE, WREC	2016-08-16, 2016-09-06, 2016-08-18, 2016-08-11	control, Preflower_during_recovery	0.604065
S03_9971486	2.66928	1.0045	3	16	1.13748	CPG3.10	9971486	Bwet, H_m, B65	KARE, WREC	2016-09-01, 2016-09-13, 2016-09-15, 2016-09-20, 2016-08-25, 2016-09-06, 2016-08-18, 2016-09-08, 2016-08-30	control, Preflower_during_recovery	2.58943
S03_10037388	1.96659	1.00899	3	6	1.26201	CPG3.10	10037388	H_m, B65	KARE, WREC	2016-08-30, 2016-08-25	Postflower_during_stress, Preflower_during_recovery	0.707228
S03_10069675	3.02524	1.16748	3	3	1.18367	CPG3.10	10069675	Bwet, H_m, B65	WREC, KARE	2016-09-15, 2016-08-25, 2016-09-13	Preflower_during_recovery	2.47994
S03_10226940	1.00331	1.00331	3	1	1.00331	CPG3.11	10226940	H_m	WREC	2016-08-23	Postflower_during_stress	1.01434
S03_10260038	2.45466	1.02659	3	6	1.30744	CPG3.11	10260038	Bwet, B65	KARE, WREC	2016-08-09, 2016-08-18, 2016-08-25	Postflower_during_stress, control	1.54023
S03_12923323	1.03722	1.03722	3	1	1.03722	CPG3.13	12923323	Bwet	WREC	2016-08-23	Preflower_during_recovery	5.52716
S03_12923724	2.68029	1.05184	3	7	1.56311	CPG3.13	12923724	H_m, B65	KARE, WREC	2016-08-02, 2016-08-18, 2016-08-30, 2016-07-22, 2016-07-26	Postflower_no_stress, control, Preflower_during_recovery	4.08235
S03_50372900	1.07304	1.07304	3	1	1.07304	CPG3.16	50372900	Bwet	WREC	2016-08-23	Preflower_during_recovery	5.11009
S03_51229131	2.04767	1.02474	3	6	1.64883	CPG3.17	51229131	Bwet, LAI, B65	WREC	2016-07-12, 2016-07-22, 2016-07-26	Preflower_during_stress	2.76919
S03_51229141	2.04767	1.31095	3	5	1.66646	CPG3.17	51229141	Bwet, LAI, B65	WREC	2016-07-12, 2016-07-22	Preflower_during_stress	2.7931
S03_51229156	2.04767	1.31095	3	5	1.66646	CPG3.17	51229156	Bwet, LAI, B65	WREC	2016-07-12, 2016-07-22	Preflower_during_stress	2.7931
S03_51229189	1.66779	1.17596	3	4	1.22822	CPG3.17	51229189	Bwet, LAI, B65	WREC	2016-07-12, 2016-07-22	Preflower_during_stress	2.4709
S03_51266334	1.20415	1.00864	3	2	1.1064	CPG3.17	51266334	Bwet, B65	WREC	2016-07-12	Preflower_during_stress	6.25287
S03_51271879	1.08654	1.08654	3	1	1.08654	CPG3.17	51271879	Bwet	WREC	2016-07-12	Preflower_during_stress	7.02733
S03_51813669	2.19014	1.02457	3	15	1.33495	CPG3.18	51813669	Bwet, H_m, B65	WREC	2016-08-16, 2016-09-06, 2016-07-12, 2016-08-23, 2016-07-26, 2016-08-02, 2016-08-30, 2016-07-22	Preflower_during_stress, control, Preflower_during_recovery	7.34343
S03_51818101	1.9488	1.04143	3	6	1.17221	CPG3.18	51818101	H_m, B65	WREC, KARE	2016-07-14, 2016-08-11, 2016-09-21, 2016-09-08, 2016-08-02, 2016-07-22	Postflower_during_stress, Postflower_no_stress, Preflower_during_recovery	8.82083
S03_52851171	1.68549	1.13532	3	4	1.4066	CPG3.19	52851171	H_m, B65	KARE	2016-07-22, 2016-07-28	Postflower_during_stress, control	3.82599
S03_52852613	1.80269	1.64145	3	2	1.72207	CPG3.19	52852613	Bwet, LAI	KARE	2016-09-21	Postflower_during_stress	1.54578
S03_57719223	1.36174	1.36174	3	1	1.36174	CPG3.21	57719223	B65	WREC	2016-08-16	Preflower_during_recovery	4.67414
S03_58137570	1.94884	1.10375	3	9	1.24116	CPG3.22	58137570	Bwet, H_m, B65	WREC, KARE	2016-08-16, 2016-08-11, 2016-07-28, 2016-09-21, 2016-08-18, 2016-07-22	Postflower_during_stress, control	1.54427
S03_58168818	1.01406	1.01406	3	1	1.01406	CPG3.22	58168818	H_m	KARE	2016-09-08	Postflower_during_stress	1.03e-05
S03_61052943	1.48004	1.32148	3	2	1.40076	CPG3.23	61052943	B65	WREC	2016-09-13	Preflower_during_recovery	5.66346
S03_61146296	1.01187	1.01187	3	1	1.01187	CPG3.23	61146296	B65	KARE	2016-09-21	Postflower_during_stress	3.74901
S03_61908787	2.17511	1.00571	3	6	1.27002	CPG3.24	61908787	Bwet, H_m, B65	WREC, KARE	2016-08-11, 2016-09-13, 2016-09-21, 2016-09-08, 2016-08-23, 2016-08-30	Postflower_during_stress, control, Preflower_during_recovery	5.06675
S03_62571403	2.01622	1.15897	3	6	1.40115	CPG3.25	62571403	Bwet, H_m, B65	KARE	2016-07-14, 2016-07-07	Preflower_during_stress	3.50918
S03_67683683	1.04855	1.04855	3	1	1.04855	CPG3.26	67683683	B65	KARE	2016-07-28	Preflower_during_recovery	3.69157
S03_67693799	1.25042	1.25042	3	1	1.25042	CPG3.26	67693799	B65	KARE	2016-07-28	Preflower_during_recovery	1.09211
S03_67699849	1.17032	1.17032	3	1	1.17032	CPG3.26	67699849	B65	KARE	2016-07-28	Preflower_during_recovery	0.970486
S03_67699850	1.17032	1.17032	3	1	1.17032	CPG3.26	67699850	B65	KARE	2016-07-28	Preflower_during_recovery	0.970486
S03_67704918	3.85251	1.17982	3	5	1.77147	CPG3.26	67704918	Bwet, LAI, B65	KARE	2016-07-22, 2016-07-28	Preflower_during_recovery	2.84968
S03_70715648	1.79254	1.00065	3	5	1.54378	CPG3.28	70715648	H_m, B65	WREC	2016-08-09, 2016-08-02	control, Preflower_during_recovery	1.42772
S03_70748840	1.15835	1.09687	3	2	1.12761	CPG3.28	70748840	Bwet, B65	WREC	2016-08-23	Postflower_during_stress	3.78337
S03_70765378	2.45466	1.03611	3	11	1.68243	CPG3.28	70765378	Bwet, H_m, B65	WREC, KARE	2016-09-06, 2016-08-18, 2016-08-11	control	0.128543
S03_70812982	2.93994	1.01054	3	11	1.16847	CPG3.28	70812982	H_m, B65	WREC	2016-08-02, 2016-09-06	control	5.16055
S03_70882387	1.81336	1.15993	3	4	1.46166	CPG3.28	70882387	H_m, B65	WREC, KARE	2016-09-21, 2016-09-15, 2016-09-06	control, Preflower_during_recovery	4.15148
S04_710957	2.04449	1.15805	4	8	1.51852	CPG4.1	710957	Bwet, LAI, B65	KARE, WREC	2016-08-16, 2016-08-09, 2016-08-30, 2016-08-25, 2016-07-28	Postflower_during_stress, control, Preflower_during_recovery	1.19011
S04_710958	2.04449	1.15805	4	8	1.51852	CPG4.1	710958	Bwet, LAI, B65	KARE, WREC	2016-08-16, 2016-08-09, 2016-08-30, 2016-08-25, 2016-07-28	Postflower_during_stress, control, Preflower_during_recovery	1.19011
S04_744840	1.41019	1.11165	4	2	1.26092	CPG4.1	744840	Bwet, LAI	KARE	2016-09-21	Postflower_during_stress	1.40864
S04_817571	1.33696	1.00945	4	3	1.21327	CPG4.1	817571	Bwet, H_m, B65	WREC	2016-09-06, 2016-08-30, 2016-07-26	Preflower_during_stress, Preflower_during_recovery	6.37811
S04_817622	1.33696	1.00945	4	3	1.21327	CPG4.1	817622	Bwet, H_m, B65	WREC	2016-09-06, 2016-08-30, 2016-07-26	Preflower_during_stress, Preflower_during_recovery	6.37811
S04_820293	1.2942	1.0317	4	2	1.16295	CPG4.1	820293	H_m	KARE, WREC	2016-08-11, 2016-08-23	Postflower_during_stress, Preflower_during_recovery	7.68129
S04_820722	1.05322	1.01056	4	2	1.03189	CPG4.1	820722	H_m, B65	WREC	2016-09-06, 2016-07-26	Preflower_during_stress, Preflower_during_recovery	6.80556
S04_820871	1.06802	1.05322	4	2	1.06062	CPG4.1	820871	H_m, B65	WREC	2016-09-06, 2016-07-26	Preflower_during_stress, Preflower_during_recovery	6.91607
S04_830045	1.43901	1.43901	4	1	1.43901	CPG4.1	830045	H_m	KARE	2016-07-22	control	4.5989
S04_991922	2.59522	1.04431	4	22	1.44245	CPG4.1	991922	Bwet, LAI, H_m, B65	WREC, KARE	2016-08-16, 2016-09-15, 2016-09-20, 2016-08-09, 2016-07-28, 2016-09-21, 2016-09-06, 2016-08-18, 2016-09-08, 2016-08-23, 2016-07-26, 2016-07-14, 2016-08-30, 2016-07-22	Postflower_during_stress, Postflower_no_stress, control, Preflower_during_recovery	9.37619
S04_1109869	1.14945	1.04486	4	4	1.13297	CPG4.2	1109869	Bwet, B65	KARE	2016-09-15	control	7.09181
S04_1209157	1.47895	1.25584	4	2	1.36739	CPG4.2	1209157	B65	KARE	2016-07-22, 2016-07-28	Preflower_during_recovery	3.30849
S04_4985371	1.09462	1.09462	4	1	1.09462	CPG4.4	4985371	B65	KARE	2016-07-28	Preflower_during_recovery	3.48841
S04_5016184	2.08706	1.00223	4	14	1.35026	CPG4.4	5016184	Bwet, H_m, B65	WREC, KARE	2016-09-15, 2016-07-28, 2016-09-21, 2016-08-18, 2016-07-12, 2016-07-22	control	6.2591
S04_5155783	1.32148	1.01717	4	2	1.16933	CPG4.4	5155783	B65	WREC	2016-09-20, 2016-09-13	Preflower_during_recovery	5.30947
S04_5537884	2.29681	1.18109	4	6	1.49286	CPG4.6	5537884	Bwet, LAI, H_m, B65	KARE	2016-07-14, 2016-07-07	Preflower_during_stress	4.03093
S04_5894488	2.35405	1.17982	4	6	1.32241	CPG4.7	5894488	Bwet, LAI, B65	KARE	2016-07-14, 2016-07-22, 2016-07-28	Preflower_during_stress, Preflower_during_recovery	4.964
S04_49825987	2.23673	1.03034	4	20	1.3842	CPG4.8	49825987	Bwet, LAI, H_m, B65	WREC, KARE	2016-08-16, 2016-09-01, 2016-09-20, 2016-07-28, 2016-09-21, 2016-09-06, 2016-08-18, 2016-07-12, 2016-07-26, 2016-07-22	Postflower_during_stress, Postflower_no_stress, control, Preflower_during_recovery	7.77416
S04_52934017	1.78104	1.18475	4	4	1.58395	CPG4.11	52934017	Bwet, B65	KARE	2016-07-22, 2016-07-28	Preflower_during_recovery	2.11718
S04_55261801	1.05342	1.05342	4	1	1.05342	CPG4.12	55261801	B65	WREC	2016-08-09	Postflower_during_stress	6.31862
S04_55308115	1.79183	1.02266	4	8	1.46181	CPG4.12	55308115	H_m	KARE	2016-08-11, 2016-09-15, 2016-08-25, 2016-07-28, 2016-09-21, 2016-09-08, 2016-07-22	Postflower_during_stress, control	2.16557
S04_57914557	4.26534	1.069	4	5	1.45069	CPG4.13	57914557	Bwet, H_m, B65	WREC	2016-08-16, 2016-08-23, 2016-08-30, 2016-09-13	Postflower_during_stress, Preflower_during_recovery	9.71412
S04_57929293	1.00918	1.00918	4	1	1.00918	CPG4.13	57929293	H_m	WREC	2016-09-13	Preflower_during_recovery	10.0571
S04_57929341	1.00918	1.00918	4	1	1.00918	CPG4.13	57929341	H_m	WREC	2016-09-13	Preflower_during_recovery	10.0571
S04_57943408	1.27847	1.27847	4	1	1.27847	CPG4.13	57943408	H_m	WREC	2016-09-13	Preflower_during_recovery	9.27703
S04_57968845	1.63011	1.63011	4	1	1.63011	CPG4.13	57968845	B65	WREC	2016-08-23	Preflower_during_recovery	7.38831
S04_57969909	1.43558	1.02236	4	2	1.22897	CPG4.13	57969909	H_m	WREC	2016-08-16, 2016-09-13	Postflower_during_stress, Preflower_during_recovery	9.79704
S04_57987870	1.13699	1.13699	4	1	1.13699	CPG4.13	57987870	H_m	WREC	2016-09-13	Preflower_during_recovery	9.75768
S04_57987925	1.05514	1.05514	4	1	1.05514	CPG4.13	57987925	H_m	WREC	2016-09-13	Preflower_during_recovery	9.18296
S04_58013870	1.85744	1.04332	4	6	1.4927	CPG4.13	58013870	H_m, B65	KARE, WREC	2016-08-16, 2016-08-23, 2016-08-30, 2016-09-21, 2016-09-13	Postflower_during_stress, Preflower_during_recovery	11.1169
S04_58029603	1.1459	1.1459	4	1	1.1459	CPG4.13	58029603	H_m	WREC	2016-09-13	Preflower_during_recovery	9.61485
S04_58033040	1.4777	1.01137	4	2	1.24454	CPG4.13	58033040	H_m, B65	WREC	2016-08-16, 2016-08-23	Postflower_during_stress, Preflower_during_recovery	7.52015
S04_58083173	1.06706	1.02976	4	2	1.04841	CPG4.13	58083173	H_m	KARE	2016-09-08, 2016-08-11	control	1.29947
S04_58184030	1.14517	1.02614	4	2	1.08566	CPG4.13	58184030	H_m	KARE	2016-09-21, 2016-09-15	Preflower_during_recovery	1.42369
S04_58184306	1.12047	1.12047	4	1	1.12047	CPG4.13	58184306	H_m	KARE	2016-09-21	Preflower_during_recovery	1.53645
S04_58193742	1.2153	1.03971	4	2	1.1275	CPG4.13	58193742	H_m, B65	KARE	2016-07-22, 2016-07-28	control	2.61925
S04_59636061	1.32821	1.32821	4	1	1.32821	CPG4.14	59636061	B65	KARE	2016-07-28	Preflower_during_recovery	0.137369
S04_59648753	1.93719	1.13863	4	2	1.53791	CPG4.14	59648753	B65	KARE	2016-07-22, 2016-07-28	Preflower_during_recovery	2.4619
S04_59680819	1.42355	1.42355	4	1	1.42355	CPG4.14	59680819	Bwet	WREC	2016-08-09	control	2.85909
S04_59719875	1.33732	1.33732	4	1	1.33732	CPG4.14	59719875	B65	WREC	2016-09-13	Preflower_during_recovery	3.95359
S04_59758537	1.06357	1.06357	4	1	1.06357	CPG4.15	59758537	B65	KARE	2016-07-28	Preflower_during_recovery	2.67446
S04_59787643	1.46356	1.1386	4	3	1.36905	CPG4.15	59787643	Bwet, LAI, B65	KARE	2016-09-21	Postflower_during_stress	1.31981
S04_59847205	1.15337	1.15337	4	1	1.15337	CPG4.16	59847205	H_m	WREC	2016-08-23	Preflower_during_recovery	7.87682
S04_59851151	2.00509	1.02043	4	5	1.57877	CPG4.16	59851151	H_m, B65	WREC	2016-08-23, 2016-09-06, 2016-08-30, 2016-09-13	Preflower_during_recovery	9.34876
S04_59875909	1.15468	1.15468	4	1	1.15468	CPG4.16	59875909	Bwet	WREC	2016-08-09	Postflower_during_stress	1.4695
S04_59920193	1.08576	1.08576	4	1	1.08576	CPG4.16	59920193	B65	WREC	2016-07-26	Preflower_during_stress	6.39886
S04_61652798	2.5009	1.03034	4	15	1.51571	CPG4.17	61652798	Bwet, LAI, H_m, B65	KARE, WREC	2016-07-07, 2016-09-13, 2016-08-11, 2016-09-01, 2016-09-20, 2016-08-25, 2016-09-21, 2016-08-23, 2016-08-30	Postflower_during_stress, Postflower_no_stress, Preflower_during_recovery	12.0115
S04_61695430	1.38988	1.38988	4	1	1.38988	CPG4.17	61695430	H_m	WREC	2016-08-30	Preflower_during_recovery	8.34395
S04_62447573	5.98926	1.05731	4	14	1.73436	CPG4.18	62447573	Bwet, H_m, B65	KARE, WREC	2016-08-16, 2016-08-11, 2016-09-13, 2016-08-09, 2016-09-20, 2016-08-18, 2016-08-23, 2016-08-02, 2016-08-30	Postflower_during_stress, Preflower_during_recovery	8.85975
S04_63517856	1.21442	1.21442	4	1	1.21442	CPG4.19	63517856	B65	WREC	2016-08-02	Preflower_during_recovery	7.11385
S04_63530173	1.98824	1.09197	4	7	1.41822	CPG4.19	63530173	Bwet, H_m, B65	KARE, WREC	2016-08-09, 2016-08-02, 2016-08-23, 2016-08-30, 2016-08-11	Preflower_during_recovery	7.39333
S04_63565299	1.01687	1.01687	4	1	1.01687	CPG4.19	63565299	H_m	WREC	2016-08-30	Preflower_during_recovery	0.051709
S04_63970118	1.06706	1.06706	4	1	1.06706	CPG4.20	63970118	H_m	KARE	2016-08-11	control	1.17134
S04_64044093	1.79063	1.79063	4	1	1.79063	CPG4.20	64044093	B65	WREC	2016-08-09	Postflower_during_stress	6.879
S04_64044102	1.79063	1.79063	4	1	1.79063	CPG4.20	64044102	B65	WREC	2016-08-09	Postflower_during_stress	6.879
S04_64047550	1.16175	1.16175	4	1	1.16175	CPG4.20	64047550	B65	WREC	2016-08-09	Postflower_during_stress	7.24949
S04_64047557	1.16175	1.16175	4	1	1.16175	CPG4.20	64047557	B65	WREC	2016-08-09	Postflower_during_stress	7.24949
S04_65860847	2.00853	1.03782	4	8	1.23955	CPG4.22	65860847	Bwet, H_m, B65	WREC, KARE	2016-08-16, 2016-09-06, 2016-08-18, 2016-07-12, 2016-08-23	control, Preflower_during_recovery	10.9662
S04_65860849	2.00853	1.13077	4	6	1.41327	CPG4.22	65860849	Bwet, H_m, B65	KARE, WREC	2016-08-16, 2016-09-06, 2016-08-18, 2016-07-12, 2016-08-23	control, Preflower_during_recovery	11.1024
S04_65861049	2.00853	1.0462	4	8	1.44488	CPG4.22	65861049	Bwet, H_m, B65	WREC, KARE	2016-08-16, 2016-09-13, 2016-09-06, 2016-08-18, 2016-07-12, 2016-08-23	control, Preflower_during_recovery	10.6669
S04_65861063	2.00853	1.0462	4	8	1.4153	CPG4.22	65861063	Bwet, H_m, B65	WREC, KARE	2016-08-16, 2016-09-13, 2016-09-06, 2016-08-18, 2016-07-12, 2016-08-23	control, Preflower_during_recovery	10.5864
S04_66943022	1.22075	1.0838	4	2	1.15227	CPG4.24	66943022	B65	KARE	2016-07-22, 2016-07-28	Preflower_during_recovery	3.32948
S04_66960184	1.0605	1.0605	4	1	1.0605	CPG4.24	66960184	B65	KARE	2016-07-22	Preflower_during_recovery	2.42882
S04_66960277	1.03709	1.03709	4	1	1.03709	CPG4.24	66960277	B65	KARE	2016-07-22	Preflower_during_recovery	2.46552
S04_66960324	1.03709	1.03709	4	1	1.03709	CPG4.24	66960324	B65	KARE	2016-07-22	Preflower_during_recovery	2.55205
S04_66960405	1.47895	1.14018	4	2	1.30956	CPG4.24	66960405	B65	KARE	2016-07-22, 2016-07-28	Preflower_during_recovery	3.26056
S04_66973818	2.95071	1.17203	4	5	1.66408	CPG4.24	66973818	B65	WREC, KARE	2016-08-23, 2016-07-22, 2016-07-28	Preflower_during_recovery	2.4654
S04_67235407	1.39187	1.39187	4	1	1.39187	CPG4.25	67235407	B65	KARE	2016-07-22	Preflower_during_recovery	2.93346
S04_67235974	1.23609	1.23609	4	1	1.23609	CPG4.25	67235974	B65	KARE	2016-07-22	Preflower_during_recovery	4.4675
S04_67236008	1.00047	1.00047	4	1	1.00047	CPG4.25	67236008	B65	KARE	2016-07-22	Preflower_during_recovery	4.04422
S04_67236009	1.00047	1.00047	4	1	1.00047	CPG4.25	67236009	B65	KARE	2016-07-22	Preflower_during_recovery	4.04422
S04_67283938	1.16064	1.03104	4	4	1.0984	CPG4.25	67283938	Bwet, H_m, B65	WREC, KARE	2016-08-09, 2016-08-23, 2016-08-11	Postflower_during_stress, Preflower_during_recovery	5.99517
S04_67359293	1.51511	1.49561	4	2	1.50536	CPG4.25	67359293	H_m	KARE	2016-09-01	control	4.88483
S04_67459575	1.05521	1.05521	4	1	1.05521	CPG4.26	67459575	B65	KARE	2016-07-22	Preflower_during_recovery	2.04475
S04_67472591	1.15143	1.15143	4	1	1.15143	CPG4.26	67472591	B65	WREC	2016-09-13	Preflower_during_recovery	2.30295
S04_67551466	1.19081	1.19081	4	1	1.19081	CPG4.26	67551466	H_m	KARE	2016-08-11	Preflower_during_recovery	6.31874
S05_1450343	1.02	1.02	5	1	1.02	CPG5.2	1450343	H_m	WREC	2016-08-16	Preflower_during_recovery	2.0254
S05_2648709	1.74	1.07	5	2	1.4	CPG5.3	2648709	B65	KARE	2016-07-22, 2016-07-28	Preflower_during_recovery	0.20595
S05_2744996	1.12	1.04	5	2	1.08	CPG5.4	2744996	Bwet, B65	KARE	2016-08-25	Preflower_during_recovery	1.59228
S05_2745011	1.12	1.04	5	2	1.08	CPG5.4	2745011	Bwet, B65	KARE	2016-08-25	Preflower_during_recovery	1.59228
S05_2745012	1.12	1.04	5	2	1.08	CPG5.4	2745012	Bwet, B65	KARE	2016-08-25	Preflower_during_recovery	1.59228
S05_2762187	2.11	1	5	12	1.29	CPG5.4	2762187	Bwet, H_m, B65	WREC, KARE	2016-08-11, 2016-08-09, 2016-08-25, 2016-08-18, 2016-09-08, 2016-08-23, 2016-08-30, 2016-07-22	Postflower_during_stress, Postflower_no_stress, control, Preflower_during_recovery	4.43612
S05_2822180	1.05	1.05	5	1	1.05	CPG5.4	2822180	H_m	WREC	2016-08-02	Postflower_during_stress	1.88462
S05_3845240	1.3	1.07	5	2	1.19	CPG5.5	3845240	H_m, B65	WREC	2016-08-30, 2016-08-23	Preflower_during_recovery	1.51913
S05_4355571	1.44	1.02	5	5	1.09	CPG5.7	4355571	B65	WREC, KARE	2016-08-09, 2016-08-18	control	2.47289
S05_4372390	1.86	1	5	13	1.1	CPG5.7	4372390	Bwet, LAI, H_m, B65	KARE, WREC	2016-08-11, 2016-09-13, 2016-08-09, 2016-08-25, 2016-09-21, 2016-09-06, 2016-09-08, 2016-08-23, 2016-08-30	Postflower_during_stress, control	2.9608
S05_4412048	1.93	1.56	5	2	1.74	CPG5.7	4412048	B65	KARE	2016-07-22, 2016-07-28	Preflower_during_recovery	4.13812
S05_4835480	2.76	1.02	5	13	1.22	CPG5.8	4835480	Bwet, H_m, B65	WREC, KARE	2016-09-13, 2016-09-01, 2016-09-15, 2016-08-09, 2016-09-21, 2016-08-18, 2016-09-08	Postflower_during_stress, control, Preflower_during_recovery	1.28214	T
S05_4868727	1.69	1.31	5	3	1.4	CPG5.8	4868727	Bwet, B65	WREC	2016-08-02, 2016-08-23	Preflower_during_recovery	6.03002	T
S05_4942422	1.79	1.2	5	2	1.5	CPG5.8	4942422	B65	WREC	2016-08-09, 2016-09-13	Postflower_during_stress, Preflower_during_recovery	2.86143	T
S05_4942567	1.3	1.21	5	2	1.26	CPG5.8	4942567	H_m, B65	WREC	2016-09-06, 2016-09-13	Preflower_during_recovery	2.93587	T
S05_4997914	1.36	1.2	5	2	1.28	CPG5.8	4997914	H_m, B65	WREC	2016-09-06, 2016-09-13	Preflower_during_recovery	3.23343	T
S05_5120580	1.33	1.33	5	1	1.33	CPG5.8	5120580	Bwet	KARE	2016-08-18	control	4.13431	T
S05_5133735	1.65	1.42	5	2	1.53	CPG5.8	5133735	Bwet, B65	KARE	2016-08-18	control	1.84015	T
S05_6806913	2.87	1.28	5	4	1.74	CPG5.9	6806913	H_m, B65	WREC	2016-08-23, 2016-08-30, 2016-09-13	control, Preflower_during_recovery	3.22514
S05_6808589	2.39	1	5	3	1.5	CPG5.9	6808589	H_m, B65	WREC	2016-09-06, 2016-08-30, 2016-09-13	control, Preflower_during_recovery	4.21338
S05_6808595	2.39	1	5	3	1.5	CPG5.9	6808595	H_m, B65	WREC	2016-09-06, 2016-08-30, 2016-09-13	control, Preflower_during_recovery	4.21338
S05_6808654	1.89	1.21	5	2	1.55	CPG5.9	6808654	H_m, B65	WREC	2016-08-30, 2016-09-13	control, Preflower_during_recovery	3.64186
S05_6991350	1.6	1.11	5	4	1.26	CPG5.10	6991350	B65	WREC	2016-08-02	Preflower_during_recovery	4.49265	T
S05_8230905	1.5	1.03	5	7	1.17	CPG5.11	8230905	H_m, B65	WREC, KARE	2016-08-16, 2016-08-09, 2016-09-21, 2016-09-08, 2016-08-23	Postflower_during_stress, control, Preflower_during_recovery	2.66376
S05_8230927	1.5	1.03	5	7	1.17	CPG5.11	8230927	H_m, B65	WREC, KARE	2016-08-16, 2016-08-09, 2016-09-21, 2016-09-08, 2016-08-23	Postflower_during_stress, control, Preflower_during_recovery	2.66376
S05_10112851	2.04	1.01	5	2	1.52	CPG5.13	10112851	H_m	KARE	2016-08-11	control	0.735698
S05_10160821	12.68	1.07	5	68	1.91	CPG5.13	10160821	Bwet, LAI, H_m, B65	WREC, KARE	2016-08-16, 2016-09-13, 2016-08-11, 2016-09-15, 2016-09-20, 2016-08-09, 2016-09-01, 2016-08-25, 2016-07-28, 2016-09-21, 2016-09-06, 2016-08-18, 2016-09-08, 2016-08-23, 2016-07-26, 2016-08-02, 2016-08-30, 2016-07-22	Postflower_during_stress, Postflower_no_stress, control, Preflower_during_recovery	1.79362
S05_10230795	1.74	1.12	5	6	1.24	CPG5.13	10230795	H_m, B65	WREC, KARE	2016-07-22, 2016-09-06, 2016-08-25, 2016-08-11, 2016-07-28	control, Preflower_during_recovery	4.16572
S05_16427373	2.35	1.07	5	4	1.55	CPG5.15	16427373	Bwet, LAI, B65	KARE	2016-09-15, 2016-09-01	Preflower_during_recovery	0.51741
S05_24044518	1.55	1.01	5	4	1.28	CPG5.16	24044518	Bwet, H_m, B65	WREC	2016-08-16, 2016-08-09, 2016-09-20	Postflower_during_stress, Preflower_during_recovery	3.3674
S05_56292220	1.03	1.03	5	1	1.03	CPG5.17	56292220	H_m	KARE	2016-08-25	Preflower_during_recovery	1.76973
S05_56444012	1.01	1.01	5	1	1.01	CPG5.18	56444012	H_m	KARE	2016-08-25	Preflower_during_recovery	1.55469
S05_56516655	1.44	1.02	5	8	1.13	CPG5.18	56516655	H_m, B65	KARE	2016-09-01, 2016-09-15, 2016-08-25, 2016-07-28, 2016-09-21, 2016-08-18, 2016-09-08	Postflower_during_stress	2.0752
S05_58063411	1.46	1.11	5	2	1.29	CPG5.19	58063411	B65	KARE	2016-07-22, 2016-07-28	Preflower_during_recovery	4.25657
S05_58064120	1.58	1.17	5	2	1.38	CPG5.19	58064120	B65	KARE	2016-07-22, 2016-07-28	Preflower_during_recovery	5.2472
S05_58106381	2.38	1.03	5	11	1.14	CPG5.19	58106381	H_m, B65	KARE	2016-08-11, 2016-09-01, 2016-09-15, 2016-09-21, 2016-09-08, 2016-07-22	Postflower_during_stress, control	3.19693
S05_58301152	1.55	1.11	5	4	1.17	CPG5.20	58301152	H_m	WREC	2016-09-13	control	5.06581
S05_59808399	1.58	1.02	5	5	1.23	CPG5.21	59808399	Bwet, B65	WREC, KARE	2016-09-15, 2016-08-09, 2016-09-21	Postflower_during_stress, Preflower_during_recovery	4.96653
S05_59826272	1.86	1.38	5	2	1.62	CPG5.21	59826272	Bwet, B65	WREC	2016-08-09	Preflower_during_recovery	4.90953
S05_64096107	1.29	1.02	5	4	1.07	CPG5.22	64096107	Bwet, B65	WREC	2016-08-02, 2016-08-30, 2016-08-23	Preflower_during_recovery	1.63937
S05_65853846	1.74	1.11	5	2	1.43	CPG5.24	65853846	B65	WREC	2016-09-06, 2016-09-13	Preflower_during_recovery	2.67002
S05_65855575	1.12	1.12	5	1	1.12	CPG5.24	65855575	B65	WREC	2016-09-13	Preflower_during_recovery	3.35963
S05_65871955	2.32	1.16	5	4	1.24	CPG5.24	65871955	Bwet, B65	WREC	2016-08-16, 2016-09-06, 2016-09-13	Postflower_during_stress, Preflower_during_recovery	1.82333
S05_65921767	1.1	1.1	5	1	1.1	CPG5.24	65921767	H_m	KARE	2016-08-11	control	1.93827
S05_65921782	1.28	1.28	5	1	1.28	CPG5.24	65921782	H_m	KARE	2016-08-11	control	2.9831
S05_66095558	2.27	1.06	5	14	1.25	CPG5.25	66095558	Bwet, H_m, B65	KARE, WREC	2016-08-16, 2016-08-11, 2016-09-15, 2016-08-09, 2016-09-21, 2016-09-08, 2016-08-02, 2016-08-30	Postflower_during_stress, control, Preflower_during_recovery	0.481529
S05_69352221	1.45	1.45	5	1	1.45	CPG5.26	69352221	B65	WREC	2016-08-16	Postflower_during_stress	0.811244
S05_69512360	1.72	1.04	5	2	1.38	CPG5.27	69512360	Bwet, B65	WREC	2016-09-06	Preflower_during_recovery	1.13947
S05_69534801	2.19	1.36	5	5	1.58	CPG5.27	69534801	Bwet, H_m, B65	WREC	2016-07-22, 2016-07-26	Postflower_no_stress	5.31083
S05_69595705	1.68	1.02	5	5	1.12	CPG5.27	69595705	Bwet, H_m, B65	WREC, KARE	2016-08-02, 2016-08-25, 2016-07-22, 2016-07-26	Postflower_during_stress, Postflower_no_stress, Preflower_during_recovery	2.43786
S05_69595851	2.68	1.04	5	7	1.41	CPG5.27	69595851	Bwet, H_m, B65	KARE, WREC	2016-08-16, 2016-07-22, 2016-09-06, 2016-08-23	Postflower_during_stress, Preflower_during_stress, control, Preflower_during_recovery	7.71232
S05_69663553	1.82	1.05	5	7	1.18	CPG5.27	69663553	H_m, B65	KARE, WREC	2016-09-01, 2016-08-09, 2016-08-23, 2016-07-26, 2016-08-30, 2016-07-22	Postflower_during_stress, Postflower_no_stress, control	3.65706
S05_69665419	1.1	1.1	5	1	1.1	CPG5.27	69665419	H_m	WREC	2016-07-22	Postflower_no_stress	3.85637
S05_69985867	2.7	1.07	5	11	1.34	CPG5.27	69985867	Bwet, B65	KARE, WREC	2016-09-15, 2016-08-30, 2016-09-13	control, Preflower_during_recovery	1.90111
S06_2927824	2.76549	1.12568	6	5	1.25176	CPG6.1	2927824	Bwet, H_m, B65	WREC, KARE	2016-08-09, 2016-08-02, 2016-08-11	Preflower_during_recovery	10.6867
S06_15381762	1.15424	1.10431	6	2	1.12927	CPG6.2	15381762	H_m	WREC	2016-08-09, 2016-08-23	Preflower_during_recovery	11.2737
S06_15382483	1.36432	1.00342	6	4	1.15024	CPG6.2	15382483	H_m, B65	WREC	2016-08-09, 2016-08-02, 2016-08-23	control, Preflower_during_recovery	12.7228
S06_33752366	2.58163	1.11495	6	5	1.90793	CPG6.3	33752366	Bwet, H_m, B65	WREC	2016-07-22, 2016-07-26	Postflower_no_stress	8.20205
S06_37905125	1.40716	1.00576	6	3	1.33538	CPG6.4	37905125	H_m	WREC	2016-07-22, 2016-07-26	control	10.177
S06_37905262	1.873	1.00669	6	12	1.19617	CPG6.4	37905262	Bwet, H_m, B65	WREC	2016-08-16, 2016-08-23, 2016-07-26, 2016-08-02, 2016-08-30, 2016-07-22	Postflower_no_stress, control, Preflower_during_recovery	13.7505
S06_37906660	1.45469	1.07971	6	3	1.13699	CPG6.4	37906660	H_m, B65	WREC	2016-08-30, 2016-09-13	Preflower_during_recovery	9.90787
S06_38161717	1.02104	1.02104	6	1	1.02104	CPG6.5	38161717	H_m	WREC	2016-08-23	Preflower_during_recovery	3.46178
S06_38161730	1.02104	1.02104	6	1	1.02104	CPG6.5	38161730	H_m	WREC	2016-08-23	Preflower_during_recovery	3.46178
S06_38162125	1.08086	1.08086	6	1	1.08086	CPG6.5	38162125	H_m	WREC	2016-08-23	Preflower_during_recovery	3.25972
S06_38162134	1.08086	1.08086	6	1	1.08086	CPG6.5	38162134	H_m	WREC	2016-08-23	Preflower_during_recovery	3.25972
S06_38178260	1.02104	1.02104	6	1	1.02104	CPG6.5	38178260	H_m	WREC	2016-08-23	Preflower_during_recovery	3.46178
S06_38183744	1.19978	1.19978	6	1	1.19978	CPG6.5	38183744	Bwet	WREC	2016-08-02	Postflower_during_stress	4.02203
S06_38196569	2.35931	1.04366	6	5	1.13226	CPG6.5	38196569	H_m, B65	KARE, WREC	2016-08-18, 2016-08-02, 2016-08-30, 2016-08-09, 2016-08-23	control, Preflower_during_recovery	3.94401
S06_38196835	1.14102	1.02544	6	2	1.08323	CPG6.5	38196835	H_m	WREC	2016-08-30, 2016-08-23	Preflower_during_recovery	3.01101
S06_39213286	2.75509	1.00675	6	9	1.22015	CPG6.6	39213286	Bwet, H_m, B65	KARE, WREC	2016-08-23, 2016-08-09, 2016-08-02, 2016-09-08, 2016-07-12	Postflower_during_stress, control, Preflower_during_recovery	10.4778
S06_39646060	1.02009	1.02009	6	1	1.02009	CPG6.7	39646060	B65	WREC	2016-08-16	control	5.53117
S06_39648963	1.18356	1.00576	6	3	1.13652	CPG6.7	39648963	H_m, B65	WREC	2016-08-16	control	4.65994
S06_39649231	1.61704	1.01904	6	7	1.22796	CPG6.7	39649231	Bwet, H_m, B65	KARE	2016-09-15, 2016-08-18, 2016-09-21, 2016-09-01	control	4.53305
S06_39672528	2.02368	1.02777	6	10	1.25884	CPG6.7	39672528	Bwet, H_m, B65	WREC, KARE	2016-09-15, 2016-08-09, 2016-09-21, 2016-08-23	Postflower_during_stress, control, Preflower_during_recovery	6.16403
S06_39672553	2.02368	1.02777	6	10	1.25884	CPG6.7	39672553	Bwet, H_m, B65	WREC, KARE	2016-09-15, 2016-08-09, 2016-09-21, 2016-08-23	Postflower_during_stress, control, Preflower_during_recovery	6.16403
S06_39672656	1.53557	1.03732	6	9	1.14339	CPG6.7	39672656	H_m, B65	KARE	2016-09-15, 2016-09-01	control	7.36581
S06_39745437	3.45712	1.00807	6	25	1.67341	CPG6.8	39745437	Bwet, H_m, B65	WREC, KARE	2016-09-01, 2016-09-13, 2016-09-15, 2016-09-21, 2016-08-18, 2016-09-08, 2016-08-30	control, Preflower_during_recovery	5.61128
S06_39745467	6.18934	1.0038	6	38	1.76876	CPG6.8	39745467	Bwet, H_m, B65	WREC, KARE	2016-09-01, 2016-09-13, 2016-09-15, 2016-09-21, 2016-09-06, 2016-08-18, 2016-09-08, 2016-08-30	control, Preflower_during_recovery	6.39369
S06_39745468	2.86747	1.00573	6	28	1.56517	CPG6.8	39745468	Bwet, H_m, B65	WREC, KARE	2016-09-01, 2016-09-13, 2016-09-15, 2016-09-21, 2016-09-06, 2016-08-18, 2016-09-08, 2016-07-22	control, Preflower_during_recovery	5.18375
S06_40853412	2.44769	1.04783	6	11	1.32706	CPG6.9	40853412	Bwet, H_m, B65	WREC, KARE	2016-09-01, 2016-09-13, 2016-08-11, 2016-08-25, 2016-09-21, 2016-09-06, 2016-08-18, 2016-08-23, 2016-08-30	Postflower_during_stress, control, Preflower_during_recovery	2.96808
S06_41992419	2.1254	1.1106	6	4	1.34962	CPG6.10	41992419	Bwet, H_m, B65	WREC, KARE	2016-08-02, 2016-08-23, 2016-08-11	Preflower_during_recovery	11.6894
S06_42013140	2.07771	1.18372	6	2	1.63071	CPG6.10	42013140	Bwet, B65	WREC	2016-08-23	Preflower_during_recovery	11.9376
S06_42023423	3.07603	1.03508	6	9	1.55101	CPG6.10	42023423	Bwet, H_m, B65	KARE, WREC	2016-08-11, 2016-09-21, 2016-09-08, 2016-08-23, 2016-08-02, 2016-08-30	Postflower_during_stress, Preflower_during_recovery	14.0183
S06_42031299	1.62682	1.01414	6	3	1.20699	CPG6.10	42031299	Bwet, H_m	KARE, WREC	2016-08-30, 2016-08-18, 2016-08-23	control, Preflower_during_recovery	15.0364
S06_42456840	1.84495	1.00196	6	17	1.34404	CPG6.10	42456840	Bwet, H_m, B65	WREC, KARE	2016-09-01, 2016-09-13, 2016-08-11, 2016-08-09, 2016-08-25, 2016-07-28, 2016-09-06, 2016-08-18, 2016-08-23, 2016-08-02, 2016-08-30	Postflower_during_stress, control, Preflower_during_recovery	8.17378
S06_42458711	1.47349	1.01074	6	4	1.24909	CPG6.10	42458711	H_m, B65	WREC	2016-08-09, 2016-08-02, 2016-08-23	Postflower_during_stress	11.0975
S06_42463774	1.09452	1.09452	6	1	1.09452	CPG6.10	42463774	Bwet	WREC	2016-08-23	Preflower_during_recovery	10.6098
S06_42463814	1.01414	1.01414	6	1	1.01414	CPG6.10	42463814	Bwet	WREC	2016-08-23	Preflower_during_recovery	10.695
S06_42463863	2.00009	2.00009	6	1	2.00009	CPG6.10	42463863	Bwet	WREC	2016-08-23	Preflower_during_recovery	10.8031
S06_42463865	2.00009	2.00009	6	1	2.00009	CPG6.10	42463865	Bwet	WREC	2016-08-23	Preflower_during_recovery	10.8031
S06_42478962	1.85949	1.15466	6	4	1.40606	CPG6.10	42478962	Bwet, H_m, B65	WREC, KARE	2016-08-23, 2016-08-30, 2016-08-11	Preflower_during_recovery	12.4238
S06_42479938	4.38433	1.07175	6	5	1.15448	CPG6.10	42479938	Bwet, B65	WREC	2016-07-12, 2016-08-23, 2016-07-26	Preflower_during_stress, Preflower_during_recovery	6.71594
S06_42479983	4.38433	1.07175	6	5	1.15448	CPG6.10	42479983	Bwet, B65	WREC	2016-07-12, 2016-08-23, 2016-07-26	Preflower_during_stress, Preflower_during_recovery	6.71594
S06_42540836	2.31015	1.05184	6	14	1.45474	CPG6.10	42540836	Bwet, H_m, B65	WREC, KARE	2016-08-16, 2016-09-01, 2016-08-11, 2016-09-21, 2016-08-18, 2016-08-23, 2016-08-30, 2016-07-22	Postflower_during_stress, Postflower_no_stress, control, Preflower_during_recovery	8.83763
S06_42540839	2.31015	1.05184	6	14	1.45474	CPG6.10	42540839	Bwet, H_m, B65	WREC, KARE	2016-08-16, 2016-09-01, 2016-08-11, 2016-09-21, 2016-08-18, 2016-08-23, 2016-08-30, 2016-07-22	Postflower_during_stress, Postflower_no_stress, control, Preflower_during_recovery	8.83763
S06_42540864	2.31015	1.05184	6	14	1.45474	CPG6.10	42540864	Bwet, H_m, B65	WREC, KARE	2016-08-16, 2016-09-01, 2016-08-11, 2016-09-21, 2016-08-18, 2016-08-23, 2016-08-30, 2016-07-22	Postflower_during_stress, Postflower_no_stress, control, Preflower_during_recovery	8.83763
S06_42584198	2.19977	1.30143	6	6	1.91442	CPG6.10	42584198	Bwet, B65	KARE, WREC	2016-09-21, 2016-08-11, 2016-07-22, 2016-08-30, 2016-08-23	Postflower_during_stress, Preflower_during_recovery	9.74289
S06_42584199	2.19977	1.30143	6	6	1.91442	CPG6.10	42584199	Bwet, B65	KARE, WREC	2016-09-21, 2016-08-11, 2016-07-22, 2016-08-30, 2016-08-23	Postflower_during_stress, Preflower_during_recovery	9.74289
S06_42584226	2.19977	1.30143	6	6	1.91442	CPG6.10	42584226	Bwet, B65	KARE, WREC	2016-09-21, 2016-08-11, 2016-07-22, 2016-08-30, 2016-08-23	Postflower_during_stress, Preflower_during_recovery	9.74289
S06_42585912	1.05023	1.05023	6	1	1.05023	CPG6.10	42585912	Bwet	KARE	2016-08-11	Postflower_during_stress	6.75882
S06_42585931	1.05568	1.01641	6	2	1.03605	CPG6.10	42585931	Bwet, B65	KARE	2016-09-21, 2016-07-22	Postflower_during_stress	7.06571
S06_43233773	1.55182	1.06849	6	2	1.31016	CPG6.10	43233773	Bwet, H_m	KARE, WREC	2016-08-30, 2016-08-11	Postflower_during_stress, Preflower_during_recovery	4.74228
S06_43233780	1.70242	1.07816	6	2	1.39029	CPG6.10	43233780	Bwet, B65	KARE	2016-09-21, 2016-08-11	Postflower_during_stress	5.82149
S06_43233796	1.70242	1.07816	6	2	1.39029	CPG6.10	43233796	Bwet, B65	KARE	2016-09-21, 2016-08-11	Postflower_during_stress	5.82149
S06_43235132	1.0417	1.0417	6	1	1.0417	CPG6.10	43235132	H_m	WREC	2016-08-30	Preflower_during_recovery	9.98685
S06_43235180	1.0417	1.0417	6	1	1.0417	CPG6.10	43235180	H_m	WREC	2016-08-30	Preflower_during_recovery	9.98685
S06_43250458	1.43534	1.17058	6	2	1.30296	CPG6.10	43250458	Bwet, B65	WREC	2016-08-23	Postflower_during_stress	7.69119
S06_43251135	1.20718	1.08094	6	2	1.14406	CPG6.10	43251135	Bwet, B65	WREC	2016-08-23	Postflower_during_stress	7.44383
S06_43277236	1.73436	1.26521	6	4	1.32257	CPG6.10	43277236	Bwet, H_m, B65	WREC, KARE	2016-09-21, 2016-08-30, 2016-08-11	Postflower_during_stress, Preflower_during_recovery	7.35477
S06_43305355	1.70242	1.26881	6	2	1.48562	CPG6.10	43305355	Bwet, H_m	KARE	2016-08-18, 2016-08-11	Postflower_during_stress	6.90943
S06_43305635	1.44391	1.00641	6	3	1.08086	CPG6.10	43305635	Bwet, H_m, B65	WREC, KARE	2016-09-21, 2016-08-23, 2016-08-11	Postflower_during_stress, Preflower_during_recovery	9.13465
S06_43308115	1.18539	1.18539	6	1	1.18539	CPG6.10	43308115	Bwet	KARE	2016-08-25	Preflower_during_recovery	2.34737
S06_43321477	1.18539	1.03656	6	2	1.11097	CPG6.10	43321477	Bwet, B65	KARE	2016-08-25	Preflower_during_recovery	5.72783
S06_43322242	1.89002	1.07648	6	3	1.63109	CPG6.10	43322242	H_m, B65	WREC, KARE	2016-09-21, 2016-08-16, 2016-08-30	Postflower_during_stress, Preflower_during_recovery	9.71954
S06_43322336	1.68702	1.02197	6	3	1.10283	CPG6.10	43322336	Bwet, H_m, B65	WREC	2016-08-16, 2016-07-22	Postflower_during_stress, Postflower_no_stress	7.17582
S06_43322397	6.7225	1.021	6	42	2.43667	CPG6.10	43322397	Bwet, LAI, H_m, B65	WREC, KARE	2016-08-16, 2016-09-13, 2016-08-11, 2016-09-01, 2016-09-20, 2016-08-09, 2016-08-25, 2016-07-28, 2016-09-21, 2016-09-06, 2016-08-18, 2016-09-08, 2016-08-23, 2016-07-26, 2016-08-30, 2016-07-22	Postflower_during_stress, Postflower_no_stress, control, Preflower_during_recovery	10.1884
S06_43323853	1.10599	1.10599	6	1	1.10599	CPG6.10	43323853	H_m	WREC	2016-07-22	Postflower_no_stress	3.1684
S06_43347246	1.70554	1.176	6	5	1.43534	CPG6.10	43347246	Bwet, H_m, B65	WREC	2016-08-16, 2016-08-23, 2016-08-30, 2016-09-13	Postflower_during_stress, control, Preflower_during_recovery	6.48883
S06_43347513	1.31555	1.06475	6	4	1.18266	CPG6.10	43347513	H_m, B65	WREC, KARE	2016-08-16, 2016-09-13, 2016-08-30, 2016-08-11	Postflower_during_stress, control, Preflower_during_recovery	10.1541
S06_43367127	1.65514	1.14249	6	2	1.39882	CPG6.10	43367127	H_m, B65	WREC	2016-08-30	Preflower_during_recovery	5.94152
S06_43587361	1.83963	1.05184	6	5	1.37347	CPG6.10	43587361	Bwet, H_m, B65	WREC, KARE	2016-09-21, 2016-07-22, 2016-08-11, 2016-08-18, 2016-08-23	Postflower_during_stress, Preflower_during_recovery	11.5136
S06_43605932	1.12926	1.12926	6	1	1.12926	CPG6.10	43605932	B65	KARE	2016-08-11	Preflower_during_recovery	5.10342
S06_43609718	2.08228	1.11878	6	4	1.51209	CPG6.10	43609718	H_m, B65	KARE	2016-08-18, 2016-08-25, 2016-07-28	control	8.29243
S06_43610614	1.79662	1.00525	6	2	1.40094	CPG6.10	43610614	B65	WREC	2016-08-16, 2016-08-23	Preflower_during_recovery	8.48473
S06_43613848	1.8607	1.11083	6	6	1.17674	CPG6.10	43613848	Bwet, H_m, B65	KARE	2016-09-15, 2016-09-21, 2016-08-18, 2016-09-08, 2016-09-01	Postflower_during_stress	8.66662
S06_44905617	1.05573	1.05573	6	1	1.05573	CPG6.11	44905617	H_m	WREC	2016-08-30	Preflower_during_recovery	6.996
S06_44905643	1.05573	1.05573	6	1	1.05573	CPG6.11	44905643	H_m	WREC	2016-08-30	Preflower_during_recovery	6.996
S06_44925108	2.5834	1.17247	6	4	1.34741	CPG6.11	44925108	Bwet, H_m, B65	WREC, KARE	2016-08-02, 2016-08-23, 2016-08-11	Preflower_during_recovery	10.2379
S06_46123203	4.14231	1.0206	6	9	1.22356	CPG6.12	46123203	B65	WREC	2016-08-23	Preflower_during_recovery	5.85426	T
S06_46123209	4.14231	1.0206	6	9	1.22356	CPG6.12	46123209	B65	WREC	2016-08-23	Preflower_during_recovery	5.85426	T
S06_46727526	1.24857	1.12627	6	2	1.18742	CPG6.13	46727526	Bwet, B65	WREC	2016-09-13	Preflower_during_recovery	2.59237
S06_47324594	1.54569	1.54569	6	1	1.54569	CPG6.14	47324594	H_m	KARE	2016-08-11	Preflower_during_recovery	5.85722
S06_47329871	2.44769	1.12773	6	11	1.55785	CPG6.14	47329871	H_m, B65	WREC	2016-09-20, 2016-08-30, 2016-09-13	Preflower_during_recovery	7.31654
S06_47329891	2.44769	1.12773	6	11	1.55785	CPG6.14	47329891	H_m, B65	WREC	2016-09-20, 2016-08-30, 2016-09-13	Preflower_during_recovery	7.31654
S06_51108384	2.52701	1.03336	6	16	1.39148	CPG6.15	51108384	Bwet, LAI, H_m, B65	WREC, KARE	2016-08-16, 2016-08-09, 2016-07-28, 2016-09-21, 2016-09-06, 2016-08-18, 2016-07-12, 2016-07-14, 2016-07-22	Postflower_during_stress, control, Preflower_during_recovery	8.61714
S06_51109099	6.75517	1.00633	6	17	1.61304	CPG6.15	51109099	Bwet, LAI, H_m, B65	KARE	2016-08-11, 2016-08-25, 2016-07-28, 2016-09-21, 2016-08-18, 2016-09-08, 2016-07-14, 2016-07-22	Postflower_during_stress, control	9.6317
S06_52043776	2.27113	1.02303	6	6	1.96403	CPG6.16	52043776	Bwet, H_m, B65	KARE, WREC	2016-09-21, 2016-08-30, 2016-09-08, 2016-07-22	Postflower_during_stress, Postflower_no_stress, Preflower_during_recovery	9.19649
S06_52051078	2.18611	1.01406	6	20	1.39968	CPG6.16	52051078	Bwet, LAI, H_m, B65	KARE, WREC	2016-08-16, 2016-09-15, 2016-07-28, 2016-09-21, 2016-09-06, 2016-08-18, 2016-07-12, 2016-08-23, 2016-07-26, 2016-09-08, 2016-07-22	Postflower_during_stress, Postflower_no_stress, control, Preflower_during_recovery	7.7802
S06_52885223	1.2004	1.11124	6	2	1.15582	CPG6.17	52885223	Bwet, LAI	KARE	2016-09-21	Postflower_during_stress	1.27741
S06_59655756	4.34718	1.0317	6	21	1.76047	CPG6.18	59655756	Bwet, LAI, H_m, B65	WREC, KARE	2016-08-11, 2016-09-15, 2016-08-25, 2016-07-28, 2016-09-21, 2016-08-18, 2016-09-08, 2016-07-26, 2016-07-22	Postflower_during_stress, Postflower_no_stress, control, Preflower_during_recovery	8.30816
S06_59662183	5.40434	1.01336	6	46	1.58312	CPG6.18	59662183	Bwet, LAI, H_m, B65	WREC, KARE	2016-07-14, 2016-09-01, 2016-08-11, 2016-09-15, 2016-08-09, 2016-08-25, 2016-07-28, 2016-09-21, 2016-08-18, 2016-09-08, 2016-08-23, 2016-07-26, 2016-08-02, 2016-08-30, 2016-07-22	Postflower_during_stress, Postflower_no_stress, Preflower_during_stress, control, Preflower_during_recovery	7.52701
S06_59667116	2.38493	1.17666	6	6	1.3704	CPG6.18	59667116	Bwet, LAI, H_m, B65	KARE	2016-09-21, 2016-08-18, 2016-07-22	Postflower_during_stress, control	7.58025
S06_59708699	1.02376	1.02376	6	1	1.02376	CPG6.18	59708699	Bwet	KARE	2016-09-21	Postflower_during_stress	2.56322
S06_59709419	3.87617	1.02976	6	26	1.42092	CPG6.18	59709419	Bwet, LAI, H_m, B65	WREC, KARE	2016-08-11, 2016-09-13, 2016-09-15, 2016-08-09, 2016-08-25, 2016-07-28, 2016-09-21, 2016-08-18, 2016-09-08, 2016-07-26, 2016-07-22	Postflower_during_stress, Preflower_during_stress, Postflower_no_stress, control, Preflower_during_recovery	7.81882
S06_59709531	2.43617	1.00899	6	9	1.20659	CPG6.18	59709531	LAI, H_m, B65	KARE	2016-08-11, 2016-09-15, 2016-08-25, 2016-07-28, 2016-09-21, 2016-08-18, 2016-07-22	Postflower_during_stress, control, Preflower_during_recovery	8.40374
S06_59749782	1.76047	1.0693	6	4	1.56343	CPG6.19	59749782	Bwet, LAI, B65	WREC, KARE	2016-09-21, 2016-08-16, 2016-09-15	Postflower_during_stress, control	6.03235
S07_863542	1.17565	1.12748	7	2	1.15157	CPG7.1	863542	Bwet, LAI	KARE	2016-09-21	Postflower_during_stress	0.0162304
S07_889765	2.00853	1.73904	7	2	1.87378	CPG7.1	889765	Bwet, B65	WREC	2016-07-12	control	4.55126
S07_889802	1.28142	1.01664	7	7	1.07469	CPG7.1	889802	Bwet, LAI, H_m, B65	KARE, WREC	2016-08-09, 2016-09-06, 2016-07-12, 2016-07-22, 2016-07-26	Preflower_during_stress, control, Preflower_during_recovery	5.17611
S07_1168054	1.69609	1.07983	7	6	1.2353	CPG7.2	1168054	Bwet, LAI, B65	WREC	2016-08-16, 2016-08-09, 2016-08-30, 2016-07-26	Preflower_during_stress, Preflower_during_recovery	3.27874
S07_1217084	1.36003	1.02155	7	9	1.24899	CPG7.2	1217084	Bwet, H_m, B65	KARE, WREC	2016-08-16, 2016-09-13, 2016-09-15, 2016-09-20, 2016-09-21, 2016-09-08, 2016-07-22	Postflower_during_stress, control, Preflower_during_recovery	7.6114
S07_1290230	1.09309	1.07505	7	2	1.08407	CPG7.2	1290230	Bwet, LAI	KARE	2016-09-21	Postflower_during_stress	0.927682
S07_1290269	1.93514	1.33288	7	3	1.90956	CPG7.2	1290269	Bwet, LAI	KARE	2016-09-21, 2016-09-15	Postflower_during_stress	1.38582
S07_2020139	1.08086	1.08086	7	1	1.08086	CPG7.3	2020139	H_m	WREC	2016-08-23	Preflower_during_recovery	0.0333335
S07_2053012	1.46068	1.03785	7	4	1.28383	CPG7.3	2053012	H_m, B65	KARE, WREC	2016-09-06, 2016-08-11	control, Preflower_during_recovery	3.19557
S07_2135159	1.53245	1.11884	7	2	1.32565	CPG7.3	2135159	H_m	KARE	2016-07-22, 2016-08-11	control	2.07215
S07_2142680	2.4371	2.4371	7	1	2.4371	CPG7.3	2142680	Bwet	WREC	2016-08-23	Preflower_during_recovery	5.44478
S07_2142699	2.4371	2.4371	7	1	2.4371	CPG7.3	2142699	Bwet	WREC	2016-08-23	Preflower_during_recovery	5.44478
S07_4260456	1.00444	1.00444	7	1	1.00444	CPG7.4	4260456	B65	KARE	2016-07-22	Preflower_during_recovery	2.22808
S07_4289537	1.74715	1.28654	7	4	1.57112	CPG7.4	4289537	Bwet, B65	KARE	2016-08-18, 2016-08-11	control	1.22733
S07_7776520	1.02763	1.02763	7	1	1.02763	CPG7.7	7776520	B65	WREC	2016-08-23	Postflower_during_stress	2.49251
S07_7830258	1.46705	1.01303	7	4	1.14056	CPG7.7	7830258	H_m, B65	WREC	2016-08-16, 2016-07-22	Postflower_no_stress, control	7.11874
S07_9105338	3.058	1.12416	7	7	2.00054	CPG7.8	9105338	Bwet, LAI, H_m, B65	WREC, KARE	2016-08-23, 2016-07-07, 2016-09-13	Postflower_no_stress, control, Preflower_during_recovery	14.226
S07_9105512	2.56532	1.13016	7	7	1.64336	CPG7.8	9105512	Bwet, LAI, H_m, B65	WREC, KARE	2016-09-13, 2016-07-07, 2016-09-06, 2016-08-23	Postflower_no_stress, Preflower_during_recovery	13.4908
S07_58693869	2.68622	1.06981	7	8	1.54943	CPG7.11	58693869	Bwet, LAI, H_m, B65	WREC, KARE	2016-08-09, 2016-08-02, 2016-08-18, 2016-07-22, 2016-07-26	Preflower_during_stress, control, Preflower_during_recovery	2.57786
S07_58698011	1.07121	1.07121	7	1	1.07121	CPG7.11	58698011	Bwet	WREC	2016-07-26	Preflower_during_stress	2.6306
S07_58698560	1.07121	1.07121	7	1	1.07121	CPG7.11	58698560	Bwet	WREC	2016-07-26	Preflower_during_stress	2.03019
S07_58698599	1.07121	1.07121	7	1	1.07121	CPG7.11	58698599	Bwet	WREC	2016-07-26	Preflower_during_stress	2.03019
S07_58699558	1.06706	1.06706	7	1	1.06706	CPG7.11	58699558	H_m	KARE	2016-08-11	control	2.4712
S07_58699637	1.63588	1.0905	7	9	1.27003	CPG7.11	58699637	Bwet, LAI, H_m, B65	WREC, KARE	2016-08-09, 2016-08-02, 2016-08-18, 2016-07-22, 2016-07-26	Preflower_during_stress, control, Preflower_during_recovery	3.64732
S07_58699690	1.0213	1.0213	7	1	1.0213	CPG7.11	58699690	H_m	KARE	2016-08-11	control	2.05432
S07_58699735	1.07121	1.07121	7	1	1.07121	CPG7.11	58699735	Bwet	WREC	2016-07-26	Preflower_during_stress	1.99528
S07_58712635	1.07121	1.00204	7	2	1.03663	CPG7.11	58712635	Bwet, H_m	WREC	2016-07-26	Preflower_during_stress	2.42237
S07_58712656	1.07121	1.00204	7	2	1.03663	CPG7.11	58712656	Bwet, H_m	WREC	2016-07-26	Preflower_during_stress	2.42237
S07_58712681	1.32747	1.00342	7	5	1.04366	CPG7.11	58712681	Bwet, H_m, B65	WREC	2016-08-09, 2016-09-06, 2016-08-30, 2016-07-26	Preflower_during_stress, Preflower_during_recovery	4.2752
S07_58712686	1.32747	1.00342	7	5	1.04366	CPG7.11	58712686	Bwet, H_m, B65	WREC	2016-08-09, 2016-09-06, 2016-08-30, 2016-07-26	Preflower_during_stress, Preflower_during_recovery	4.2752
S07_58712694	1.32747	1.00342	7	5	1.04366	CPG7.11	58712694	Bwet, H_m, B65	WREC	2016-08-09, 2016-09-06, 2016-08-30, 2016-07-26	Preflower_during_stress, Preflower_during_recovery	4.2752
S07_58713495	1.07121	1.07121	7	1	1.07121	CPG7.11	58713495	Bwet	WREC	2016-07-26	Preflower_during_stress	1.81886
S07_58713697	1.11639	1.021	7	4	1.08786	CPG7.11	58713697	Bwet, LAI, H_m, B65	KARE, WREC	2016-08-09, 2016-07-28, 2016-07-26	Preflower_during_stress, control, Preflower_during_recovery	2.26761
S07_58713698	1.11639	1.021	7	4	1.08786	CPG7.11	58713698	Bwet, LAI, H_m, B65	KARE, WREC	2016-08-09, 2016-07-28, 2016-07-26	Preflower_during_stress, control, Preflower_during_recovery	2.26761
S07_58728347	1.59829	1.00363	7	12	1.23508	CPG7.11	58728347	Bwet, LAI, H_m, B65	WREC, KARE	2016-09-01, 2016-08-11, 2016-08-09, 2016-07-28, 2016-08-18, 2016-07-26, 2016-08-30, 2016-07-22	Preflower_during_stress, control, Preflower_during_recovery	2.78749
S07_58728409	1.14474	1.07175	7	3	1.0808	CPG7.11	58728409	Bwet, H_m	KARE, WREC	2016-08-18, 2016-07-26	Preflower_during_stress, control	3.22967
S07_58728771	1.5085	1.014	7	7	1.10575	CPG7.11	58728771	Bwet, LAI, H_m, B65	WREC, KARE	2016-08-11, 2016-08-09, 2016-07-28, 2016-08-18, 2016-07-26, 2016-07-22	Preflower_during_stress, control, Preflower_during_recovery	2.71211
S07_58732388	1.55056	1.00204	7	6	1.15292	CPG7.11	58732388	Bwet, H_m, B65	WREC, KARE	2016-08-09, 2016-07-28, 2016-08-18, 2016-08-11, 2016-07-26	Preflower_during_stress, control, Preflower_during_recovery	2.85571
S07_58732712	1.39713	1.03584	7	5	1.11913	CPG7.11	58732712	Bwet, H_m, B65	KARE, WREC	2016-08-09, 2016-08-18, 2016-07-26	Preflower_during_stress, control, Preflower_during_recovery	2.90347
S07_58924028	2.09801	1.16166	7	2	1.62983	CPG7.12	58924028	Bwet	WREC	2016-08-09, 2016-08-23	control, Preflower_during_recovery	1.73374
S07_58990926	1.32744	1.18356	7	2	1.2555	CPG7.12	58990926	H_m, B65	WREC	2016-08-16	control	0.351524
S07_59095402	1.00204	1.00204	7	1	1.00204	CPG7.12	59095402	H_m	WREC	2016-07-26	Preflower_during_stress	4.57468
S07_59096829	5.98926	1.11639	7	18	1.91515	CPG7.12	59096829	Bwet, LAI, H_m, B65	KARE, WREC	2016-08-09, 2016-09-21, 2016-07-12, 2016-08-23, 2016-07-26, 2016-08-02, 2016-08-30, 2016-07-22	Preflower_during_stress, Postflower_during_stress, Preflower_during_recovery	12.6126
S07_59208119	2.1254	1.03776	7	3	1.21214	CPG7.12	59208119	Bwet, H_m, B65	WREC, KARE	2016-08-09, 2016-08-23, 2016-08-11	Preflower_during_recovery	4.77291
S07_59225553	1.13729	1.13729	7	1	1.13729	CPG7.12	59225553	B65	WREC	2016-08-09	Preflower_during_recovery	3.41247
S07_59244097	2.02368	1.02254	7	3	1.42993	CPG7.12	59244097	H_m, B65	KARE, WREC	2016-09-21, 2016-08-09, 2016-09-01	Postflower_during_stress, control	3.39105
S07_59298818	1.55178	1.10264	7	3	1.3377	CPG7.12	59298818	Bwet, H_m, B65	WREC	2016-07-22	Postflower_no_stress	5.46253
S07_59303780	1.32991	1.32991	7	1	1.32991	CPG7.12	59303780	B65	KARE	2016-09-01	Preflower_during_recovery	0.611517
S07_59307281	1.65766	1.2586	7	2	1.45813	CPG7.12	59307281	H_m	WREC	2016-07-22, 2016-07-26	Postflower_no_stress	4.99597
S07_59307290	1.65766	1.2586	7	2	1.45813	CPG7.12	59307290	H_m	WREC	2016-07-22, 2016-07-26	Postflower_no_stress	4.99597
S07_59393451	1.2586	1.19884	7	2	1.22872	CPG7.12	59393451	H_m	WREC	2016-07-22, 2016-07-26	Postflower_no_stress	2.85924
S07_59393452	1.2586	1.19884	7	2	1.22872	CPG7.12	59393452	H_m	WREC	2016-07-22, 2016-07-26	Postflower_no_stress	2.85924
S07_59393504	1.13018	1.13018	7	1	1.13018	CPG7.12	59393504	B65	WREC	2016-07-26	Postflower_no_stress	3.67342
S07_59393553	1.79903	1.0045	7	7	1.2565	CPG7.12	59393553	Bwet, H_m, B65	WREC	2016-07-22, 2016-07-26	Postflower_no_stress, control	4.58553
S07_59393567	1.64134	1.04447	7	5	1.24711	CPG7.12	59393567	Bwet, H_m, B65	WREC	2016-07-22, 2016-07-26	Postflower_no_stress	4.53325
S07_59397216	1.52573	1.2538	7	2	1.38977	CPG7.12	59397216	H_m	WREC	2016-07-22, 2016-07-26	Postflower_no_stress	3.41878
S07_59397308	1.82143	1.16053	7	2	1.49098	CPG7.12	59397308	H_m	WREC	2016-07-22, 2016-07-26	Postflower_no_stress	4.00408
S07_59397330	1.86206	1.19751	7	2	1.52979	CPG7.12	59397330	H_m	WREC	2016-07-22, 2016-07-26	Postflower_no_stress	4.22109
S07_59398667	1.92209	1.10575	7	8	1.54458	CPG7.12	59398667	Bwet, H_m, B65	WREC, KARE	2016-08-18, 2016-07-22, 2016-07-26	Postflower_no_stress, control	4.75289
S07_59400476	2.14301	1.0808	7	9	1.64552	CPG7.12	59400476	Bwet, H_m, B65	KARE, WREC	2016-08-18, 2016-07-22, 2016-07-26	Postflower_no_stress, control	5.08961
S07_59400583	1.76872	1.03058	7	4	1.23887	CPG7.12	59400583	Bwet, H_m, B65	WREC	2016-07-22, 2016-07-26	Postflower_no_stress	4.91818
S07_59404098	1.70352	1.13018	7	7	1.30585	CPG7.12	59404098	Bwet, H_m, B65	WREC	2016-07-22, 2016-07-26	Postflower_no_stress, control	5.00894
S07_59404164	1.37649	1.37649	7	1	1.37649	CPG7.12	59404164	H_m	WREC	2016-07-26	Postflower_no_stress	3.41133
S07_59404214	1.37649	1.37649	7	1	1.37649	CPG7.12	59404214	H_m	WREC	2016-07-26	Postflower_no_stress	3.41133
S07_59417836	1.63388	1.00344	7	3	1.5726	CPG7.12	59417836	H_m, B65	WREC	2016-07-22, 2016-07-26	Postflower_no_stress	4.94893
S07_59459124	2.06365	1.04106	7	10	1.71623	CPG7.12	59459124	Bwet, H_m, B65	WREC, KARE	2016-08-16, 2016-07-26, 2016-07-22, 2016-07-28	Postflower_during_stress, Postflower_no_stress, control	5.02976
S07_59479760	2.38174	1.00084	7	12	1.13678	CPG7.12	59479760	Bwet, H_m, B65	WREC, KARE	2016-07-26, 2016-08-18, 2016-07-22, 2016-07-28	Postflower_no_stress, control	1.32146
S07_59489261	3.09811	1.00367	7	33	1.41224	CPG7.12	59489261	Bwet, H_m, B65	WREC, KARE	2016-08-11, 2016-09-01, 2016-09-20, 2016-08-09, 2016-08-25, 2016-07-28, 2016-09-21, 2016-08-18, 2016-08-23, 2016-07-26, 2016-08-02, 2016-08-30, 2016-07-22	Postflower_during_stress, Postflower_no_stress, control, Preflower_during_recovery	2.23962
S07_59499158	1.75883	1.04135	7	2	1.40009	CPG7.12	59499158	H_m	WREC	2016-07-22, 2016-07-26	Postflower_no_stress, control	2.48368
S07_59499604	1.82787	1.00899	7	5	1.20209	CPG7.12	59499604	H_m	KARE	2016-07-14, 2016-08-25, 2016-07-22, 2016-07-28	Postflower_during_stress, Postflower_no_stress, control, Preflower_during_recovery	1.48515
S07_59520850	1.21411	1.08801	7	2	1.15106	CPG7.12	59520850	H_m	WREC	2016-07-22, 2016-07-26	Postflower_no_stress	4.91412
S07_59547359	4.06611	1.28688	7	6	1.97075	CPG7.12	59547359	Bwet, H_m, B65	WREC	2016-08-09, 2016-07-22, 2016-07-26	Postflower_during_stress, Postflower_no_stress, control	2.8259
S07_59593029	1.06341	1.06341	7	1	1.06341	CPG7.12	59593029	H_m	KARE	2016-08-18	control	0.702077
S07_59593030	1.04801	1.04801	7	1	1.04801	CPG7.12	59593030	H_m	KARE	2016-08-18	control	0.773773
S07_59593032	1.46716	1.46716	7	1	1.46716	CPG7.12	59593032	H_m	KARE	2016-08-18	control	0.9393
S07_59608577	5.34089	1.04568	7	36	1.90197	CPG7.12	59608577	Bwet, LAI, H_m, B65	WREC, KARE	2016-08-16, 2016-08-11, 2016-09-01, 2016-08-09, 2016-08-25, 2016-07-28, 2016-09-21, 2016-08-18, 2016-08-23, 2016-07-26, 2016-08-02, 2016-08-30, 2016-07-22	Postflower_during_stress, Postflower_no_stress, control, Preflower_during_recovery	3.73607
S07_59614079	4.89262	1.01397	7	15	2.52669	CPG7.12	59614079	Bwet, H_m, B65	WREC	2016-08-09, 2016-08-02, 2016-07-22, 2016-07-26	Postflower_during_stress, Postflower_no_stress, control	5.33597
S07_59630298	6.16387	1.02785	7	27	1.91317	CPG7.12	59630298	Bwet, H_m, B65	WREC, KARE	2016-08-16, 2016-08-11, 2016-08-09, 2016-07-28, 2016-08-18, 2016-08-23, 2016-07-26, 2016-08-02, 2016-07-22	Postflower_during_stress, Postflower_no_stress, control, Preflower_during_recovery	3.56498
S07_59630319	5.74545	1.03027	7	26	2.05648	CPG7.12	59630319	Bwet, H_m, B65	WREC, KARE	2016-08-09, 2016-07-28, 2016-08-18, 2016-07-12, 2016-08-23, 2016-07-26, 2016-08-02, 2016-07-22	Postflower_during_stress, Postflower_no_stress, control	4.30044
S07_59630334	6.22512	1.02791	7	37	1.79032	CPG7.12	59630334	Bwet, H_m, B65	WREC, KARE	2016-08-16, 2016-08-11, 2016-09-20, 2016-08-09, 2016-07-28, 2016-09-06, 2016-08-18, 2016-07-12, 2016-08-23, 2016-07-26, 2016-08-02, 2016-08-30, 2016-07-22	Postflower_during_stress, Postflower_no_stress, control	2.42321
S07_59630478	5.91517	1.0289	7	27	2.11591	CPG7.12	59630478	Bwet, H_m, B65	WREC, KARE	2016-08-16, 2016-08-09, 2016-07-28, 2016-08-18, 2016-07-12, 2016-08-23, 2016-07-26, 2016-08-02, 2016-07-22	Postflower_during_stress, Postflower_no_stress, control	3.56715
S07_59632642	4.77252	1.01278	7	16	2.04596	CPG7.12	59632642	Bwet, H_m, B65	WREC	2016-08-16, 2016-08-09, 2016-08-02, 2016-07-22, 2016-07-26	Postflower_during_stress, Postflower_no_stress, control	3.26265
S07_59646804	2.1816	1.68027	7	2	1.93093	CPG7.12	59646804	Bwet, B65	WREC	2016-08-02, 2016-08-23	Preflower_during_recovery	5.46912
S07_59654305	1.94317	1.39713	7	2	1.67015	CPG7.12	59654305	H_m	WREC, KARE	2016-08-18, 2016-07-26	Preflower_during_stress, control	3.49123
S07_59662400	1.04148	1.04148	7	1	1.04148	CPG7.12	59662400	B65	WREC	2016-08-30	Preflower_during_recovery	2.98379
S07_59675001	2.27288	1.74347	7	2	2.00817	CPG7.12	59675001	Bwet, B65	WREC	2016-08-02, 2016-08-23	Preflower_during_recovery	4.16171
S07_59751994	5.80918	1.08248	7	24	2.15489	CPG7.12	59751994	Bwet, H_m, B65	WREC	2016-08-16, 2016-08-09, 2016-07-12, 2016-08-23, 2016-07-26, 2016-08-02, 2016-07-22	Postflower_during_stress, Postflower_no_stress, control	4.06942
S07_59785746	2.66136	1.04437	7	15	1.69474	CPG7.12	59785746	Bwet, H_m, B65	WREC	2016-08-16, 2016-08-02, 2016-07-22, 2016-07-26	Postflower_during_stress, Postflower_no_stress, control	3.49402
S07_59785754	2.66136	1.04437	7	15	1.69474	CPG7.12	59785754	Bwet, H_m, B65	WREC	2016-08-16, 2016-08-02, 2016-07-22, 2016-07-26	Postflower_during_stress, Postflower_no_stress, control	3.49402
S07_59805423	1.33139	1.12262	7	2	1.22701	CPG7.12	59805423	Bwet, B65	WREC	2016-07-12	control	2.25971
S07_59805510	1.43901	1.29832	7	2	1.36866	CPG7.12	59805510	H_m, B65	KARE, WREC	2016-07-12, 2016-07-22	control	5.93729
S07_59805571	1.8312	1.8312	7	1	1.8312	CPG7.12	59805571	Bwet	WREC	2016-08-23	Preflower_during_recovery	8.2057
S07_59805580	1.8312	1.8312	7	1	1.8312	CPG7.12	59805580	Bwet	WREC	2016-08-23	Preflower_during_recovery	8.2057
S07_59805641	1.61439	1.16984	7	4	1.38044	CPG7.12	59805641	Bwet, H_m, B65	WREC, KARE	2016-07-22, 2016-08-18, 2016-07-12, 2016-08-23	control, Preflower_during_recovery	6.75795
S07_59813115	1.25776	1.11019	7	6	1.17117	CPG7.12	59813115	Bwet, H_m, B65	WREC	2016-08-09, 2016-08-30, 2016-07-12, 2016-07-22, 2016-07-26	Postflower_during_stress, control, Preflower_during_recovery	5.67716
S07_59813120	1.25776	1.11019	7	6	1.17117	CPG7.12	59813120	Bwet, H_m, B65	WREC	2016-08-09, 2016-08-30, 2016-07-12, 2016-07-22, 2016-07-26	Postflower_during_stress, control, Preflower_during_recovery	5.67716
S07_59813121	1.25776	1.11019	7	6	1.17117	CPG7.12	59813121	Bwet, H_m, B65	WREC	2016-08-09, 2016-08-30, 2016-07-12, 2016-07-22, 2016-07-26	Postflower_during_stress, control, Preflower_during_recovery	5.67716
S07_59829983	1.1513	1.0577	7	2	1.1045	CPG7.12	59829983	Bwet, B65	WREC	2016-07-12	control	5.35232
S07_59944757	5.45098	1.13609	7	13	2.12949	CPG7.12	59944757	Bwet, H_m, B65	WREC	2016-07-12, 2016-07-22, 2016-07-26	Postflower_no_stress, control	5.10984
S07_59944847	4.00575	1.03942	7	13	1.71378	CPG7.12	59944847	Bwet, H_m, B65	WREC	2016-07-12, 2016-07-22, 2016-07-26	Postflower_no_stress, control	2.60727
S07_59945395	1.06444	1.04269	7	2	1.05356	CPG7.12	59945395	B65	WREC, KARE	2016-08-16, 2016-07-28	Postflower_during_stress	1.46707
S07_59952993	2.52669	1.01699	7	14	1.38012	CPG7.12	59952993	Bwet, H_m, B65	KARE, WREC	2016-08-16, 2016-09-01, 2016-08-09, 2016-08-18, 2016-07-26, 2016-08-02, 2016-07-22	Postflower_during_stress, Postflower_no_stress, control, Preflower_during_recovery	2.99112
S07_59953003	2.52669	1.01278	7	14	1.57487	CPG7.12	59953003	Bwet, H_m, B65	WREC	2016-08-16, 2016-08-09, 2016-08-02, 2016-07-22, 2016-07-26	Postflower_during_stress, Postflower_no_stress, control	3.84976
S07_59956049	3.91816	1.10905	7	13	2.37059	CPG7.12	59956049	Bwet, H_m, B65	WREC	2016-08-09, 2016-08-02, 2016-07-12, 2016-07-22, 2016-07-26	Postflower_during_stress, Postflower_no_stress, control	3.58994
S07_60007124	2.78229	1.02197	7	12	1.32264	CPG7.12	60007124	Bwet, H_m, B65	WREC	2016-08-09, 2016-08-02, 2016-07-12, 2016-07-22, 2016-07-26	Postflower_during_stress, Postflower_no_stress, control	4.27239
S07_60022612	1.65241	1.01303	7	4	1.35131	CPG7.12	60022612	H_m, B65	WREC	2016-07-22, 2016-07-26	Postflower_no_stress, control	3.70469
S07_60027641	1.00213	1.00213	7	1	1.00213	CPG7.12	60027641	Bwet	WREC	2016-08-09	control	1.43732
S07_60060868	1.85025	1.85025	7	1	1.85025	CPG7.12	60060868	Bwet	WREC	2016-08-09	control	2.25279
S07_60102977	2.49708	1.05733	7	6	1.33436	CPG7.12	60102977	Bwet, H_m, B65	WREC	2016-08-09, 2016-07-22, 2016-07-26	Postflower_no_stress, control	4.44947
S07_60104728	1.14825	1.14825	7	1	1.14825	CPG7.12	60104728	H_m	WREC	2016-07-26	Postflower_no_stress	4.79137
S07_60116517	3.94441	1.03942	7	10	1.74177	CPG7.12	60116517	Bwet, H_m, B65	WREC	2016-08-09, 2016-07-22, 2016-07-26	Postflower_during_stress, Postflower_no_stress, control	4.16945
S07_60116539	3.94441	1.03942	7	10	1.74177	CPG7.12	60116539	Bwet, H_m, B65	WREC	2016-08-09, 2016-07-22, 2016-07-26	Postflower_during_stress, Postflower_no_stress, control	4.16945
S07_60135667	1.122	1.122	7	1	1.122	CPG7.12	60135667	H_m	WREC	2016-07-26	Postflower_no_stress	1.3064
S07_60181796	5.56407	1.00643	7	81	1.7126	CPG7.12	60181796	Bwet, LAI, H_m, B65	WREC, KARE	2016-08-16, 2016-09-13, 2016-09-01, 2016-09-15, 2016-08-09, 2016-09-20, 2016-08-11, 2016-08-25, 2016-07-28, 2016-09-21, 2016-09-06, 2016-08-18, 2016-09-08, 2016-07-12, 2016-07-26, 2016-08-23, 2016-08-02, 2016-08-30, 2016-07-22	Preflower_during_stress, Postflower_during_stress, Postflower_no_stress, control, Preflower_during_recovery	8.0227
S07_60200276	3.21501	1.00322	7	29	1.31626	CPG7.12	60200276	Bwet, LAI, H_m, B65	KARE, WREC	2016-08-16, 2016-08-11, 2016-09-01, 2016-09-15, 2016-08-09, 2016-08-25, 2016-07-28, 2016-09-21, 2016-09-06, 2016-08-18, 2016-07-12, 2016-08-23, 2016-07-26, 2016-08-02, 2016-07-22	Preflower_during_stress, Postflower_during_stress, control, Preflower_during_recovery	6.09032
S07_60201540	1.19701	1.17703	7	2	1.18702	CPG7.12	60201540	Bwet, H_m	KARE	2016-09-21, 2016-08-11	Postflower_during_stress, control	2.75212
S07_61009544	4.66669	1.07334	7	10	1.32832	CPG7.13	61009544	Bwet, B65	KARE, WREC	2016-08-09, 2016-08-02, 2016-09-21, 2016-08-23	Postflower_during_stress, control, Preflower_during_recovery	9.25425
S07_61020354	1.01899	1.01899	7	1	1.01899	CPG7.13	61020354	B65	WREC	2016-08-09	control	2.52303
S07_62611661	1.18638	1.18638	7	1	1.18638	CPG7.14	62611661	H_m	WREC	2016-07-26	Postflower_no_stress	4.04254
S07_62611667	1.18638	1.18638	7	1	1.18638	CPG7.14	62611667	H_m	WREC	2016-07-26	Postflower_no_stress	4.04254
S07_62611669	1.18638	1.18638	7	1	1.18638	CPG7.14	62611669	H_m	WREC	2016-07-26	Postflower_no_stress	4.04254
S07_63691737	1.10283	1.10283	7	1	1.10283	CPG7.16	63691737	B65	WREC	2016-07-22	Postflower_no_stress	3.65986
S07_63696779	1.01243	1.01243	7	1	1.01243	CPG7.16	63696779	B65	KARE	2016-08-11	control	1.92314
S07_64851003	1.38874	1.38874	7	1	1.38874	CPG7.17	64851003	B65	WREC	2016-08-09	Postflower_during_stress	1.45156
S07_64857536	1.38874	1.02064	7	2	1.20469	CPG7.17	64857536	B65	WREC	2016-08-09	Postflower_during_stress	0.904651
S07_65323014	1.48463	1.48463	7	1	1.48463	CPG7.18	65323014	B65	WREC	2016-08-16	Preflower_during_recovery	2.27554
S08_235155	1.60936	1.06195	8	2	1.33566	CPG8.1	235155	B65	KARE	2016-07-22, 2016-07-28	Preflower_during_recovery	1.46742
S08_245737	1.15677	1.15677	8	1	1.15677	CPG8.1	245737	B65	KARE	2016-07-28	Preflower_during_recovery	13.0498
S08_245760	1.15677	1.15677	8	1	1.15677	CPG8.1	245760	B65	KARE	2016-07-28	Preflower_during_recovery	12.9754
S08_268025	3.41987	1.02303	8	19	1.63075	CPG8.1	268025	Bwet, H_m, B65	KARE, WREC	2016-08-16, 2016-08-11, 2016-09-13, 2016-09-01, 2016-09-20, 2016-08-09, 2016-09-21, 2016-09-06, 2016-09-08, 2016-08-23, 2016-08-02, 2016-08-30	Postflower_during_stress, control, Preflower_during_recovery	12.5186
S08_1698774	1.72732	1.0637	8	7	1.3377	CPG8.2	1698774	Bwet, H_m, B65	WREC	2016-08-16, 2016-07-22, 2016-07-26	Postflower_during_stress, Postflower_no_stress	1.52206
S08_1698825	1.80442	1.06463	8	8	1.27888	CPG8.2	1698825	Bwet, H_m, B65	WREC	2016-08-16, 2016-08-09, 2016-07-22, 2016-07-26	Postflower_during_stress, Postflower_no_stress	1.66537
S08_2271776	1.13799	1.13799	8	1	1.13799	CPG8.3	2271776	B65	WREC	2016-09-06	Preflower_during_recovery	2.09268
S08_2286527	2.54977	1.01406	8	15	1.80398	CPG8.3	2286527	Bwet, LAI, H_m, B65	WREC, KARE	2016-08-16, 2016-09-01, 2016-09-15, 2016-08-25, 2016-09-21, 2016-09-08, 2016-07-26	Postflower_during_stress, Postflower_no_stress	3.43967
S08_2287315	1.94373	1.02659	8	11	1.52458	CPG8.3	2287315	Bwet, LAI, B65	WREC, KARE	2016-08-16, 2016-09-01, 2016-09-15, 2016-08-25, 2016-09-21, 2016-09-08	Postflower_during_stress	3.48253
S08_2838736	2.02697	1.03797	8	13	1.19883	CPG8.4	2838736	Bwet, H_m, B65	WREC, KARE	2016-08-11, 2016-08-18, 2016-07-12, 2016-08-23, 2016-07-26, 2016-08-02, 2016-08-30, 2016-07-22	Preflower_during_stress, control, Preflower_during_recovery	6.51903
S08_7012427	1.11314	1.11314	8	1	1.11314	CPG8.5	7012427	H_m	KARE	2016-08-11	Preflower_during_recovery	2.49807
S08_7012457	1.11314	1.11314	8	1	1.11314	CPG8.5	7012457	H_m	KARE	2016-08-11	Preflower_during_recovery	2.49807
S08_7012463	1.11314	1.11314	8	1	1.11314	CPG8.5	7012463	H_m	KARE	2016-08-11	Preflower_during_recovery	2.49807
S08_7569976	1.11204	1.11204	8	1	1.11204	CPG8.6	7569976	B65	KARE	2016-08-25	Preflower_during_recovery	2.0801
S08_7580163	1.4154	1.06242	8	5	1.12047	CPG8.6	7580163	Bwet, H_m, B65	WREC, KARE	2016-09-21, 2016-09-20, 2016-09-13, 2016-08-11	control, Preflower_during_recovery	3.28051
S08_7582592	1.2433	1.12719	8	5	1.19701	CPG8.6	7582592	H_m, B65	WREC, KARE	2016-09-15, 2016-09-13, 2016-09-21, 2016-08-25, 2016-08-11	control, Preflower_during_recovery	2.31843
S08_7582597	1.61304	1.06679	8	4	1.15659	CPG8.6	7582597	H_m, B65	WREC, KARE	2016-08-30, 2016-08-18, 2016-08-25, 2016-08-11	Postflower_during_stress, control	1.89236
S08_35623477	1.4311	1.00206	8	4	1.22565	CPG8.7	35623477	H_m, B65	WREC, KARE	2016-09-15, 2016-08-09, 2016-09-08, 2016-09-13	Postflower_during_stress, control	4.16967
S08_35623483	1.4311	1.00206	8	4	1.22565	CPG8.7	35623483	H_m, B65	WREC, KARE	2016-09-15, 2016-08-09, 2016-09-08, 2016-09-13	Postflower_during_stress, control	4.16967
S08_35632566	1.6144	1.6144	8	1	1.6144	CPG8.7	35632566	B65	KARE	2016-09-21	Postflower_during_stress	3.68135
S08_46347251	1.70311	1.02645	8	6	1.25416	CPG8.8	46347251	Bwet, H_m, B65	WREC	2016-09-06, 2016-08-30, 2016-09-13	control	3.87451
S08_46348607	1.01747	1.01747	8	1	1.01747	CPG8.8	46348607	B65	KARE	2016-09-21	Postflower_during_stress	3.59601
S08_46410403	1.23512	1.10927	8	2	1.17219	CPG8.8	46410403	Bwet, H_m	WREC, KARE	2016-09-21, 2016-09-06	Postflower_during_stress, control	2.55042
S08_46410411	1.52568	1.01923	8	3	1.31441	CPG8.8	46410411	Bwet, H_m	KARE, WREC	2016-09-21, 2016-09-06, 2016-09-13	Postflower_during_stress, control	3.18323
S08_47570414	1.42523	1.01747	8	4	1.26747	CPG8.9	47570414	Bwet, LAI, B65	WREC, KARE	2016-09-21, 2016-09-13	Postflower_during_stress, control	5.97069
S08_47573335	1.18757	1.18757	8	1	1.18757	CPG8.9	47573335	B65	WREC	2016-09-13	control	5.6074
S08_50687039	1.91	1.0905	8	4	1.38157	CPG8.10	50687039	LAI, B65	WREC, KARE	2016-08-09, 2016-07-22, 2016-07-28	control, Preflower_during_recovery	1.64762
S08_50687263	2.77277	1.04429	8	5	1.39187	CPG8.10	50687263	H_m, B65	KARE	2016-07-22, 2016-07-28	control, Preflower_during_recovery	5.75781
S08_54711027	3.71599	1.00641	8	47	1.4171	CPG8.11	54711027	Bwet, LAI, H_m, B65	WREC, KARE	2016-08-16, 2016-08-02, 2016-09-13, 2016-09-01, 2016-09-15, 2016-08-09, 2016-09-20, 2016-08-25, 2016-07-28, 2016-09-21, 2016-09-06, 2016-08-18, 2016-09-08, 2016-07-12, 2016-07-26, 2016-08-23, 2016-07-14, 2016-08-30, 2016-07-22	Postflower_during_stress, Postflower_no_stress, Preflower_during_stress, control, Preflower_during_recovery	9.67033
S08_54856486	2.21383	1.00697	8	5	1.4668	CPG8.12	54856486	Bwet, H_m, B65	WREC	2016-08-16, 2016-08-30, 2016-08-23, 2016-07-26	Postflower_during_stress, Postflower_no_stress, Preflower_during_recovery	1.81607
S08_54856539	1.51431	1.00204	8	6	1.16439	CPG8.12	54856539	Bwet, H_m, B65	WREC	2016-08-16, 2016-08-23, 2016-07-22, 2016-07-26	Preflower_during_stress, Postflower_during_stress, Postflower_no_stress, control, Preflower_during_recovery	7.13464
S08_54856564	1.51431	1.00204	8	6	1.16439	CPG8.12	54856564	Bwet, H_m, B65	WREC	2016-08-16, 2016-08-23, 2016-07-22, 2016-07-26	Preflower_during_stress, Postflower_during_stress, Postflower_no_stress, control, Preflower_during_recovery	7.13464
S08_55019414	1.94354	1.43223	8	2	1.68788	CPG8.13	55019414	Bwet, H_m	WREC, KARE	2016-08-18, 2016-07-26	Preflower_during_stress, control	4.82006
S08_55019533	1.0905	1.02457	8	3	1.07772	CPG8.13	55019533	Bwet, LAI, B65	WREC	2016-08-16, 2016-08-09, 2016-07-26	Preflower_during_stress, Preflower_during_recovery	5.12982
S08_55019550	1.0905	1.02457	8	3	1.07772	CPG8.13	55019550	Bwet, LAI, B65	WREC	2016-08-16, 2016-08-09, 2016-07-26	Preflower_during_stress, Preflower_during_recovery	5.12982
S08_55085126	1.68094	1.34005	8	4	1.37609	CPG8.13	55085126	H_m, B65	WREC	2016-09-06, 2016-07-22, 2016-07-26	Preflower_during_stress, Preflower_during_recovery	7.93992
S08_55099455	2.17892	1.08315	8	11	1.54156	CPG8.13	55099455	Bwet, H_m, B65	KARE, WREC	2016-08-16, 2016-09-13, 2016-07-28, 2016-09-06, 2016-07-12, 2016-07-26, 2016-08-30, 2016-07-22	Preflower_during_stress, control, Preflower_during_recovery	7.76055
S08_55099541	2.42587	1.00908	8	9	1.46517	CPG8.13	55099541	Bwet, H_m, B65	KARE, WREC	2016-09-13, 2016-07-28, 2016-09-06, 2016-07-12, 2016-07-26, 2016-08-30, 2016-07-22	Preflower_during_stress, control, Preflower_during_recovery	7.02225
S08_58132968	2.58815	1.25342	8	2	1.92078	CPG8.14	58132968	B65	KARE	2016-07-22, 2016-07-28	Preflower_during_recovery	4.50924
S08_58147382	2.09857	1.027	8	8	1.5615	CPG8.14	58147382	H_m, B65	WREC, KARE	2016-09-13, 2016-09-06, 2016-09-01	Postflower_during_stress, Preflower_during_recovery	0.91508
S08_58166175	2.30629	1.01073	8	12	1.42525	CPG8.14	58166175	H_m, B65	WREC	2016-08-16, 2016-08-09, 2016-09-06, 2016-09-13	Postflower_during_stress	0.834046
S08_58166898	1.31888	1.03184	8	4	1.27924	CPG8.14	58166898	Bwet, B65	KARE, WREC	2016-09-15, 2016-09-01, 2016-08-23	Preflower_during_recovery	2.47901
S08_58166919	1.31888	1.03184	8	4	1.27924	CPG8.14	58166919	Bwet, B65	KARE, WREC	2016-09-15, 2016-09-01, 2016-08-23	Preflower_during_recovery	2.47901
S08_61747437	2.29508	1.79454	8	3	2.26085	CPG8.16	61747437	Bwet, B65	WREC	2016-08-09, 2016-08-02, 2016-08-23	Preflower_during_recovery	7.50304	T
S08_61782921	1.20134	1.20134	8	1	1.20134	CPG8.16	61782921	Bwet	WREC	2016-08-23	Preflower_during_recovery	8.12019	T
S08_61790077	3.29271	1.1106	8	7	1.43911	CPG8.16	61790077	Bwet, H_m, B65	WREC, KARE	2016-08-02, 2016-08-18, 2016-08-30, 2016-08-23	control, Preflower_during_recovery	12.899	T
S08_61921414	1.24899	1.24899	8	1	1.24899	CPG8.17	61921414	B65	KARE	2016-07-22	Postflower_during_stress	4.11021
S08_61921415	1.41172	1.24899	8	2	1.33036	CPG8.17	61921415	B65	KARE	2016-07-22	Postflower_during_stress	4.7758
S08_61921569	1.07222	1.07222	8	1	1.07222	CPG8.17	61921569	B65	KARE	2016-07-22	Postflower_during_stress	4.85989
S09_978708	1.00714	1.00714	9	1	1.00714	CPG9.1	978708	H_m	WREC	2016-09-06	Preflower_during_recovery	1.79919
S09_1925076	1.12525	1.10922	9	2	1.11724	CPG9.2	1925076	Bwet, B65	KARE	2016-07-07	Postflower_no_stress	0.325104	T
S09_2092495	1.20659	1.20659	9	1	1.20659	CPG9.2	2092495	H_m	KARE	2016-07-28	control	1.53986	T
S09_2092565	1.43921	1.0319	9	4	1.17102	CPG9.2	2092565	H_m, B65	WREC, KARE	2016-08-16, 2016-09-08, 2016-08-11	Postflower_during_stress, control	1.23285	T
S09_2238406	1.00319	1.00319	9	1	1.00319	CPG9.2	2238406	H_m	KARE	2016-07-28	control	0.705381	T
S09_2313557	1.19923	1.19923	9	1	1.19923	CPG9.2	2313557	B65	WREC	2016-09-06	Preflower_during_recovery	1.56592	T
S09_2380534	1.06195	1.06195	9	1	1.06195	CPG9.2	2380534	B65	KARE	2016-07-22	Preflower_during_recovery	1.16478	T
S09_2472051	1.41317	1.10063	9	3	1.24979	CPG9.2	2472051	Bwet, H_m, B65	WREC	2016-08-16, 2016-07-22	Postflower_during_stress, Postflower_no_stress	6.13708	T
S09_3685006	2.07956	1.03184	9	5	1.17542	CPG9.3	3685006	Bwet, B65	KARE	2016-09-15, 2016-08-11, 2016-09-01	Preflower_during_recovery	1.91848
S09_3741359	1.26645	1.26645	9	1	1.26645	CPG9.3	3741359	H_m	KARE	2016-09-15	Preflower_during_recovery	1.80765
S09_9802092	1.36771	1.09309	9	3	1.13532	CPG9.6	9802092	LAI, B65	WREC, KARE	2016-09-21, 2016-07-12, 2016-07-22	Postflower_during_stress, control	4.33689
S09_9802271	1.61105	1.0889	9	10	1.29008	CPG9.6	9802271	Bwet, H_m, B65	WREC, KARE	2016-08-16, 2016-07-28, 2016-08-18, 2016-07-12, 2016-07-26, 2016-07-22	Postflower_during_stress, Postflower_no_stress, control	6.25689
S09_18877638	1.68637	1.00322	9	10	1.51711	CPG9.7	18877638	Bwet, H_m, B65	WREC, KARE	2016-08-09, 2016-09-20, 2016-08-23, 2016-08-30, 2016-08-11	Postflower_during_stress, Preflower_during_recovery	12.8047
S09_46908192	5.58724	1.03958	9	7	1.6005	CPG9.9	46908192	H_m, B65	KARE	2016-07-14, 2016-07-22, 2016-07-28	Postflower_during_stress, Postflower_no_stress, control	1.7271
S09_46957294	1.58017	1.41755	9	3	1.56525	CPG9.9	46957294	H_m, B65	KARE	2016-07-22, 2016-07-28	Postflower_during_stress, control	1.29506
S09_46957314	1.0462	1.0462	9	1	1.0462	CPG9.9	46957314	B65	WREC	2016-09-13	Preflower_during_recovery	1.18691
S09_47051407	1.35644	1.35644	9	1	1.35644	CPG9.9	47051407	Bwet	WREC	2016-08-23	Preflower_during_recovery	0.89401
S09_47665890	2.07956	1.02024	9	7	1.18367	CPG9.10	47665890	Bwet, B65	KARE	2016-09-15, 2016-09-01, 2016-08-25, 2016-08-11	Preflower_during_recovery	4.49258
S09_47665937	1.37494	1.37494	9	1	1.37494	CPG9.10	47665937	B65	KARE	2016-09-01	Preflower_during_recovery	5.67992
S09_47676134	1.68549	1.26931	9	6	1.38503	CPG9.10	47676134	H_m, B65	WREC, KARE	2016-07-26, 2016-08-18, 2016-07-22, 2016-07-28	Postflower_during_stress, Postflower_no_stress, control	8.8739
S09_47676150	1.68549	1.26931	9	6	1.38503	CPG9.10	47676150	H_m, B65	WREC, KARE	2016-07-26, 2016-08-18, 2016-07-22, 2016-07-28	Postflower_during_stress, Postflower_no_stress, control	8.8739
S09_50458071	1.19132	1.19132	9	1	1.19132	CPG9.11	50458071	H_m	KARE	2016-07-28	control	8.21447
S09_50458133	5.01661	1.04993	9	73	1.99006	CPG9.11	50458133	Bwet, LAI, H_m, B65	KARE, WREC	2016-08-16, 2016-07-14, 2016-09-01, 2016-08-11, 2016-09-15, 2016-09-20, 2016-09-13, 2016-08-09, 2016-08-25, 2016-07-28, 2016-09-21, 2016-09-06, 2016-08-18, 2016-09-08, 2016-08-23, 2016-08-02, 2016-08-30, 2016-07-22	Postflower_during_stress, control, Preflower_during_recovery	8.46921
S09_50458284	2.02049	1.08372	9	5	1.68549	CPG9.11	50458284	Bwet, H_m, B65	WREC, KARE	2016-07-22, 2016-08-18, 2016-08-23, 2016-07-28	control, Preflower_during_recovery	9.05169
S09_50586458	1.05322	1.05322	9	1	1.05322	CPG9.12	50586458	B65	WREC	2016-09-06	Preflower_during_recovery	0.470273
S09_50595573	1.26903	1.17017	9	2	1.2196	CPG9.12	50595573	Bwet, H_m	WREC	2016-09-20	Preflower_during_recovery	0.256998
S09_50600089	1.25439	1.00679	9	2	1.13059	CPG9.12	50600089	Bwet, H_m	WREC	2016-09-20	Preflower_during_recovery	0.213033
S09_51742506	3.93351	1.00247	9	16	1.63221	CPG9.13	51742506	Bwet, H_m, B65	KARE, WREC	2016-08-16, 2016-08-11, 2016-09-13, 2016-08-09, 2016-09-08, 2016-08-23, 2016-07-26, 2016-08-02, 2016-08-30, 2016-07-22	Postflower_during_stress, Postflower_no_stress, Preflower_during_recovery	7.6663
S09_51743195	1.10927	1.00361	9	2	1.05644	CPG9.13	51743195	H_m	WREC	2016-08-16, 2016-09-06	control	1.3871
S09_53296581	1.43178	1.43178	9	1	1.43178	CPG9.14	53296581	Bwet	WREC	2016-08-23	Preflower_during_recovery	8.13564
S09_53296909	1.26211	1.0204	9	2	1.14126	CPG9.14	53296909	B65	WREC	2016-08-23, 2016-09-13	control, Preflower_during_recovery	7.45302
S09_55043314	2.26	2.26	9	1	2.26	CPG9.15	55043314	B65	WREC	2016-08-16	Postflower_during_stress	3.67082
S09_55043320	2.26	2.26	9	1	2.26	CPG9.15	55043320	B65	WREC	2016-08-16	Postflower_during_stress	3.67082
S09_55043671	2.15	2.15	9	1	2.15	CPG9.15	55043671	B65	WREC	2016-08-16	Postflower_during_stress	3.0928
S09_55044615	1.04	1.04	9	1	1.04	CPG9.15	55044615	B65	WREC	2016-09-06	Preflower_during_recovery	1.61879
S09_55056650	1.29	1.02	9	2	1.16	CPG9.15	55056650	B65	WREC	2016-08-09, 2016-08-23	Postflower_during_stress, Preflower_during_recovery	5.33378
S09_55094554	2.13	1.05	9	3	1.46	CPG9.15	55094554	Bwet, B65	WREC	2016-08-02, 2016-08-23	Preflower_during_recovery	7.63126
S09_55183769	1.02	1.02	9	1	1.02	CPG9.15	55183769	B65	KARE	2016-08-18	control	6.0014
S09_55214860	1.09	1.09	9	1	1.09	CPG9.15	55214860	B65	WREC	2016-08-02	Preflower_during_recovery	3.46467
S09_55215301	1.54	1.54	9	1	1.54	CPG9.15	55215301	H_m	WREC	2016-08-30	Preflower_during_recovery	6.39931
S09_55215304	1.54	1.54	9	1	1.54	CPG9.15	55215304	H_m	WREC	2016-08-30	Preflower_during_recovery	6.39931
S09_55220571	2.2	1.06	9	12	1.56	CPG9.15	55220571	Bwet, H_m, B65	KARE, WREC	2016-08-16, 2016-08-11, 2016-09-13, 2016-08-09, 2016-08-23, 2016-08-02, 2016-07-22	Postflower_during_stress, control, Preflower_during_recovery	7.52342
S09_55277884	5.99	1.02	9	47	1.64	CPG9.15	55277884	Bwet, LAI, H_m, B65	KARE, WREC	2016-08-16, 2016-08-02, 2016-07-07, 2016-09-01, 2016-09-13, 2016-08-11, 2016-08-09, 2016-09-20, 2016-08-25, 2016-07-28, 2016-09-21, 2016-09-06, 2016-08-18, 2016-09-08, 2016-08-23, 2016-07-26, 2016-07-14, 2016-08-30, 2016-07-22	Postflower_during_stress, Preflower_during_stress, Postflower_no_stress, control, Preflower_during_recovery	17.9374
S09_55280035	2.76	1.05	9	11	1.32	CPG9.15	55280035	Bwet, LAI, H_m, B65	KARE, WREC	2016-08-16, 2016-09-01, 2016-09-13, 2016-07-28, 2016-09-21, 2016-09-06, 2016-08-30, 2016-07-22	Postflower_during_stress, control, Preflower_during_recovery	8.14516
S09_55308166	1.43	1.43	9	1	1.43	CPG9.15	55308166	Bwet	WREC	2016-08-23	Preflower_during_recovery	11.629
S09_55308167	4.35	1	9	21	1.23	CPG9.15	55308167	Bwet, H_m, B65	KARE, WREC	2016-08-16, 2016-09-13, 2016-09-20, 2016-08-09, 2016-09-06, 2016-08-18, 2016-08-23, 2016-07-26, 2016-08-02, 2016-08-30, 2016-07-22	Postflower_during_stress, control, Preflower_during_recovery	8.31189
S09_55308174	4.35	1	9	21	1.23	CPG9.15	55308174	Bwet, H_m, B65	KARE, WREC	2016-08-16, 2016-09-13, 2016-09-20, 2016-08-09, 2016-09-06, 2016-08-18, 2016-08-23, 2016-07-26, 2016-08-02, 2016-08-30, 2016-07-22	Postflower_during_stress, control, Preflower_during_recovery	8.31189
S09_55308216	4.35	1	9	21	1.23	CPG9.15	55308216	Bwet, H_m, B65	KARE, WREC	2016-08-16, 2016-09-13, 2016-09-20, 2016-08-09, 2016-09-06, 2016-08-18, 2016-08-23, 2016-07-26, 2016-08-02, 2016-08-30, 2016-07-22	Postflower_during_stress, control, Preflower_during_recovery	8.31189
S09_55345291	1.39	1.39	9	1	1.39	CPG9.15	55345291	Bwet	WREC	2016-07-26	Preflower_during_stress	1.90247
S09_55345331	1.07	1.07	9	1	1.07	CPG9.15	55345331	Bwet	WREC	2016-07-26	Preflower_during_stress	2.19058
S09_55358673	1.14	1.14	9	1	1.14	CPG9.15	55358673	B65	WREC	2016-08-23	Preflower_during_recovery	1.72872
S09_55363082	1.17	1.17	9	1	1.17	CPG9.15	55363082	B65	WREC	2016-09-13	Preflower_during_recovery	3.30617
S09_55386033	1.25	1.25	9	1	1.25	CPG9.15	55386033	B65	WREC	2016-08-16	Postflower_during_stress	4.68035
S09_55386065	1.25	1.25	9	1	1.25	CPG9.15	55386065	B65	WREC	2016-08-16	Postflower_during_stress	4.68035
S09_55458891	2.55	1.01	9	8	1.2	CPG9.15	55458891	Bwet, H_m, B65	WREC	2016-08-09, 2016-08-02, 2016-08-30, 2016-08-23	Preflower_during_recovery	6.73792
S09_55511609	1.2	1.2	9	1	1.2	CPG9.15	55511609	H_m	KARE	2016-08-18	control	3.79125
S09_55575466	1.11	1.11	9	1	1.11	CPG9.15	55575466	B65	WREC	2016-08-16	control	5.5319
S09_55826895	1.16	1	9	4	1.04	CPG9.16	55826895	Bwet, B65	WREC	2016-08-16, 2016-08-30	Postflower_during_stress, Preflower_during_recovery	2.34595
S09_56344478	1.26	1.26	9	1	1.26	CPG9.17	56344478	B65	WREC	2016-08-16	Postflower_during_stress	0.654713
S09_56352170	1.06	1.06	9	1	1.06	CPG9.17	56352170	Bwet	WREC	2016-08-23	Preflower_during_recovery	1.18957
S09_56407157	1.36	1.36	9	1	1.36	CPG9.17	56407157	B65	WREC	2016-08-16	Postflower_during_stress	6.03233
S09_56407209	1.27	1.27	9	1	1.27	CPG9.17	56407209	B65	WREC	2016-08-16	Postflower_during_stress	4.4311
S09_56412487	2.82	2.82	9	1	2.82	CPG9.17	56412487	B65	WREC	2016-08-09	Postflower_during_stress	4.86507
S09_56419671	1.22	1.22	9	1	1.22	CPG9.17	56419671	B65	WREC	2016-08-16	Postflower_during_stress	3.68148
S09_56468402	1.36	1.03	9	4	1.14	CPG9.17	56468402	Bwet, B65	WREC	2016-08-16, 2016-07-22	Postflower_during_stress, Postflower_no_stress	4.28849
S09_56476343	1.22	1.22	9	1	1.22	CPG9.17	56476343	B65	WREC	2016-08-16	Postflower_during_stress	0.680814
S09_56482848	1.08	1.08	9	1	1.08	CPG9.17	56482848	H_m	WREC	2016-08-16	Postflower_during_stress	7.22265
S09_56491621	1.29	1.29	9	1	1.29	CPG9.17	56491621	B65	WREC	2016-08-30	Preflower_during_recovery	4.19153
S09_56497693	1.79	1.79	9	1	1.79	CPG9.17	56497693	B65	WREC	2016-08-09	Postflower_during_stress	6.46166
S09_56520935	1.29	1.29	9	1	1.29	CPG9.17	56520935	B65	WREC	2016-08-16	Postflower_during_stress	3.85706
S09_56567417	2.11	1.03	9	6	1.5	CPG9.17	56567417	Bwet, H_m, B65	WREC, KARE	2016-09-15, 2016-08-16, 2016-08-25	Postflower_during_stress, control, Preflower_during_recovery	0.742952
S09_56628436	1.09	1.01	9	3	1.02	CPG9.17	56628436	H_m, B65	WREC, KARE	2016-08-16, 2016-08-18, 2016-07-22	Postflower_during_stress, control	5.33553
S09_56643761	1.4	1.4	9	1	1.4	CPG9.17	56643761	H_m	WREC	2016-08-09	Postflower_during_stress	9.45069
S09_56643852	1.41	1.41	9	1	1.41	CPG9.17	56643852	H_m	WREC	2016-08-16	Postflower_during_stress	9.69213
S09_56643853	1.41	1.41	9	1	1.41	CPG9.17	56643853	H_m	WREC	2016-08-16	Postflower_during_stress	9.69213
S09_56643856	1.57	1.21	9	2	1.39	CPG9.17	56643856	H_m, B65	WREC	2016-08-16	Postflower_during_stress	9.21207
S09_56657157	8.12	1.02	9	39	1.57	CPG9.17	56657157	Bwet, LAI, H_m, B65	WREC, KARE	2016-08-16, 2016-09-13, 2016-09-01, 2016-09-15, 2016-08-09, 2016-09-20, 2016-09-21, 2016-09-06, 2016-08-18, 2016-09-08, 2016-08-23, 2016-08-02, 2016-08-30	Postflower_during_stress, control, Preflower_during_recovery	10.264
S09_56657639	2.54	1	9	8	1.22	CPG9.17	56657639	Bwet, H_m, B65	KARE, WREC	2016-08-16, 2016-09-13, 2016-09-15, 2016-09-21, 2016-08-18, 2016-08-30	control, Preflower_during_recovery	8.81322
S09_56657651	2.54	1	9	8	1.22	CPG9.17	56657651	Bwet, H_m, B65	KARE, WREC	2016-08-16, 2016-09-13, 2016-09-15, 2016-09-21, 2016-08-18, 2016-08-30	control, Preflower_during_recovery	8.81322
S09_56658490	3.6	1.01	9	22	1.34	CPG9.17	56658490	Bwet, LAI, H_m, B65	WREC, KARE	2016-08-16, 2016-09-01, 2016-09-13, 2016-09-15, 2016-09-20, 2016-09-21, 2016-09-06, 2016-08-18, 2016-09-08, 2016-08-30	control, Preflower_during_recovery	6.94228
S09_56703427	2.79	1	9	6	1.43	CPG9.17	56703427	Bwet, H_m, B65	WREC	2016-08-16, 2016-08-09, 2016-08-23, 2016-07-22	Postflower_no_stress, control, Preflower_during_recovery	14.212
S09_56705459	2	2	9	1	2	CPG9.17	56705459	Bwet	WREC	2016-08-23	Preflower_during_recovery	12.4082
S09_56715110	1.93	1.26	9	2	1.6	CPG9.17	56715110	Bwet, H_m	WREC	2016-08-16, 2016-08-23	Postflower_during_stress, Preflower_during_recovery	10.0148
S09_56718182	1.43	1.15	9	2	1.29	CPG9.17	56718182	Bwet, H_m	WREC	2016-08-16, 2016-08-23	Postflower_during_stress, Preflower_during_recovery	9.52035
S09_56718186	1.43	1.15	9	2	1.29	CPG9.17	56718186	Bwet, H_m	WREC	2016-08-16, 2016-08-23	Postflower_during_stress, Preflower_during_recovery	9.52035
S09_56747483	2.62	1.09	9	6	1.66	CPG9.17	56747483	Bwet, H_m, B65	WREC, KARE	2016-08-16, 2016-08-23, 2016-08-30, 2016-08-11	Postflower_during_stress, control, Preflower_during_recovery	11.4086
S09_56758976	1.69	1.54	9	2	1.61	CPG9.17	56758976	Bwet, B65	WREC	2016-08-23	Preflower_during_recovery	9.10879
S09_56759005	1.69	1.54	9	2	1.61	CPG9.17	56759005	Bwet, B65	WREC	2016-08-23	Preflower_during_recovery	9.10879
S09_56784872	1.09	1.09	9	1	1.09	CPG9.17	56784872	H_m	KARE	2016-08-18	control	3.36329
S09_56785655	2.29	1.07	9	2	1.68	CPG9.17	56785655	Bwet, B65	WREC	2016-08-16	Postflower_during_stress	4.46763
S09_56785679	2.27	1.06	9	2	1.66	CPG9.17	56785679	Bwet, B65	WREC	2016-08-16	Postflower_during_stress	3.23605
S09_56788470	1.95	1.95	9	1	1.95	CPG9.17	56788470	B65	WREC	2016-08-16	Postflower_during_stress	4.2613
S09_56795129	2.27	1.28	9	2	1.78	CPG9.17	56795129	H_m, B65	WREC, KARE	2016-08-16, 2016-08-11	Postflower_during_stress, control	3.83069
S09_56796772	2.29	1.07	9	2	1.68	CPG9.17	56796772	Bwet, B65	WREC	2016-08-16	Postflower_during_stress	4.53747
S09_56796780	2.29	1.07	9	2	1.68	CPG9.17	56796780	Bwet, B65	WREC	2016-08-16	Postflower_during_stress	4.53747
S09_56798490	2.03	2.03	9	1	2.03	CPG9.17	56798490	B65	WREC	2016-08-16	Postflower_during_stress	4.22492
S09_56798548	2.03	2.03	9	1	2.03	CPG9.17	56798548	B65	WREC	2016-08-16	Postflower_during_stress	3.89991
S09_56799927	1.81	1.81	9	1	1.81	CPG9.17	56799927	B65	WREC	2016-08-16	Postflower_during_stress	5.66609
S09_56799948	1.81	1.81	9	1	1.81	CPG9.17	56799948	B65	WREC	2016-08-16	Postflower_during_stress	5.66609
S09_56799957	1.81	1.81	9	1	1.81	CPG9.17	56799957	B65	WREC	2016-08-16	Postflower_during_stress	5.66609
S09_56800058	2.8	1.52	9	2	2.16	CPG9.17	56800058	Bwet, B65	WREC	2016-08-16	Postflower_during_stress	3.9834
S09_56810386	2.29	1.15	9	3	1.2	CPG9.17	56810386	Bwet, H_m, B65	KARE, WREC	2016-08-16, 2016-08-25	Postflower_during_stress, Preflower_during_recovery	3.70174
S09_56816575	2.11	2.11	9	1	2.11	CPG9.17	56816575	B65	WREC	2016-08-16	Postflower_during_stress	4.09506
S09_56816628	1.64	1.64	9	1	1.64	CPG9.17	56816628	B65	WREC	2016-08-16	Postflower_during_stress	3.91883
S09_56847368	1.37	1.12	9	2	1.24	CPG9.17	56847368	Bwet, B65	WREC	2016-08-16, 2016-08-23	Postflower_during_stress, Preflower_during_recovery	4.26918
S09_56910476	2.18	1.07	9	4	1.41	CPG9.18	56910476	Bwet, B65	WREC	2016-08-16, 2016-08-23	Postflower_during_stress, Preflower_during_recovery	3.94431	T
S09_56945723	1.34	1.16	9	3	1.28	CPG9.18	56945723	Bwet, H_m, B65	WREC	2016-08-30, 2016-08-23	Preflower_during_recovery	7.38358	T
S09_56975335	3.42	1.01	9	21	1.2	CPG9.18	56975335	Bwet, H_m, B65	KARE, WREC	2016-08-16, 2016-08-11, 2016-09-13, 2016-09-01, 2016-08-09, 2016-09-20, 2016-09-06, 2016-08-18, 2016-08-23, 2016-08-30	Postflower_during_stress, control, Preflower_during_recovery	5.91163	T
S09_56984594	1.57	1.01	9	4	1.24	CPG9.18	56984594	H_m	KARE, WREC	2016-08-16, 2016-08-30, 2016-09-08, 2016-08-11	Postflower_during_stress, Preflower_during_recovery	6.01815	T
S09_56986521	3.74	1.06	9	19	1.32	CPG9.18	56986521	Bwet, LAI, H_m, B65	KARE, WREC	2016-08-16, 2016-09-01, 2016-08-09, 2016-07-06, 2016-07-12, 2016-08-23, 2016-07-26, 2016-08-02, 2016-08-30, 2016-07-22	Preflower_during_stress, control, Preflower_during_recovery	7.79722	T
S09_57004218	2.7	1.08	9	11	1.27	CPG9.18	57004218	Bwet, H_m, B65	WREC	2016-08-16, 2016-08-23, 2016-08-30, 2016-09-13	Postflower_during_stress, control, Preflower_during_recovery	9.54015	T
S09_57026985	1.14	1.01	9	2	1.07	CPG9.18	57026985	Bwet, B65	KARE	2016-09-21	Postflower_during_stress	0.965516	T
S09_57051085	2.91	1.03	9	19	1.41	CPG9.18	57051085	Bwet, H_m, B65	WREC, KARE	2016-08-16, 2016-09-13, 2016-09-01, 2016-08-11, 2016-09-08, 2016-08-23, 2016-08-30	Postflower_during_stress, control, Preflower_during_recovery	8.669	T
S09_57051565	1.67	1.08	9	10	1.28	CPG9.18	57051565	Bwet, H_m, B65	WREC	2016-08-16, 2016-08-02, 2016-08-30, 2016-08-23	Postflower_during_stress, Preflower_during_recovery	9.54038	T
S09_57057648	1.22	1.22	9	1	1.22	CPG9.18	57057648	B65	WREC	2016-08-16	Postflower_during_stress	7.15807	T
S09_57060469	2.26	1.02	9	10	1.5	CPG9.18	57060469	Bwet, H_m, B65	KARE, WREC	2016-08-16, 2016-08-11, 2016-09-13, 2016-08-18, 2016-09-08, 2016-08-23	Postflower_during_stress, control, Preflower_during_recovery	8.06022	T
S09_57060473	3.28	1	9	66	1.64	CPG9.18	57060473	Bwet, H_m, B65	WREC, KARE	2016-08-16, 2016-09-01, 2016-08-11, 2016-09-15, 2016-09-13, 2016-09-20, 2016-08-09, 2016-08-25, 2016-09-21, 2016-09-06, 2016-08-18, 2016-09-08, 2016-08-23, 2016-08-30	Postflower_during_stress, control, Preflower_during_recovery	8.37545	T
S09_57065264	3.49	1	9	59	1.58	CPG9.18	57065264	Bwet, H_m, B65	KARE, WREC	2016-08-16, 2016-09-13, 2016-09-01, 2016-08-11, 2016-09-20, 2016-08-09, 2016-09-15, 2016-08-25, 2016-09-21, 2016-09-06, 2016-08-18, 2016-09-08, 2016-08-23, 2016-08-30	Postflower_during_stress, control, Preflower_during_recovery	8.94387	T
S09_57065277	3.72	1.01	9	62	1.61	CPG9.18	57065277	Bwet, H_m, B65	KARE, WREC	2016-08-16, 2016-09-13, 2016-09-01, 2016-08-11, 2016-09-20, 2016-08-09, 2016-09-15, 2016-08-25, 2016-09-21, 2016-09-06, 2016-08-18, 2016-09-08, 2016-08-23, 2016-08-30	Postflower_during_stress, control, Preflower_during_recovery	9.05552	T
S09_57068940	3.27	1.02	9	56	1.59	CPG9.18	57068940	Bwet, H_m, B65	WREC, KARE	2016-08-16, 2016-09-01, 2016-08-11, 2016-09-15, 2016-09-13, 2016-09-20, 2016-08-25, 2016-09-21, 2016-09-06, 2016-08-18, 2016-09-08, 2016-08-23, 2016-08-30	Postflower_during_stress, control, Preflower_during_recovery	8.8693	T
S09_57069120	2.97	1	9	46	1.36	CPG9.18	57069120	Bwet, LAI, H_m, B65	WREC, KARE	2016-08-16, 2016-08-11, 2016-09-01, 2016-09-13, 2016-08-09, 2016-09-15, 2016-08-25, 2016-09-21, 2016-09-06, 2016-08-18, 2016-09-08, 2016-08-23, 2016-08-02, 2016-08-30	Postflower_during_stress, control, Preflower_during_recovery	9.04936	T
S09_57082863	2.94	1.05	9	35	1.27	CPG9.18	57082863	Bwet, H_m, B65	WREC, KARE	2016-09-13, 2016-09-01, 2016-09-15, 2016-08-09, 2016-09-20, 2016-08-11, 2016-08-25, 2016-07-28, 2016-09-21, 2016-09-06, 2016-08-18, 2016-09-08, 2016-08-23, 2016-08-30, 2016-07-22	Postflower_during_stress, control, Preflower_during_recovery	4.95861	T
S09_57082938	1.04	1.04	9	1	1.04	CPG9.18	57082938	B65	WREC	2016-08-23	control	2.65382	T
S09_57088592	1.09	1.01	9	2	1.05	CPG9.18	57088592	H_m	KARE	2016-09-21, 2016-09-08	Postflower_during_stress	2.13064	T
S09_57093230	2.5	1.02	9	22	1.51	CPG9.18	57093230	Bwet, LAI, H_m, B65	KARE, WREC	2016-08-16, 2016-08-11, 2016-09-13, 2016-09-01, 2016-09-20, 2016-09-06, 2016-08-18, 2016-09-08, 2016-08-02, 2016-08-30	control, Preflower_during_recovery	3.95679	T
S09_57100864	2.81	1	9	21	1.35	CPG9.18	57100864	Bwet, H_m, B65	WREC, KARE	2016-08-16, 2016-09-01, 2016-09-13, 2016-08-11, 2016-08-25, 2016-07-28, 2016-09-21, 2016-08-18, 2016-08-23, 2016-08-30, 2016-07-22	Postflower_during_stress, control, Preflower_during_recovery	6.65029	T
S09_57100867	2.81	1	9	21	1.35	CPG9.18	57100867	Bwet, H_m, B65	WREC, KARE	2016-08-16, 2016-09-01, 2016-09-13, 2016-08-11, 2016-08-25, 2016-07-28, 2016-09-21, 2016-08-18, 2016-08-23, 2016-08-30, 2016-07-22	Postflower_during_stress, control, Preflower_during_recovery	6.65029	T
S09_57129152	2.11	1.29	9	6	1.7	CPG9.18	57129152	Bwet, LAI, B65	WREC	2016-08-16, 2016-07-12, 2016-07-22, 2016-07-26	Preflower_during_stress, control	4.61062	T
S09_57139599	1.31	1.02	9	3	1.27	CPG9.18	57139599	Bwet, B65	WREC	2016-08-16, 2016-08-30	Preflower_during_recovery	4.98304	T
S09_57139854	1.72	1.38	9	3	1.7	CPG9.18	57139854	Bwet, B65	WREC	2016-08-16	Postflower_during_stress, control	4.50008	T
S09_57152651	1.24	1.24	9	1	1.24	CPG9.18	57152651	Bwet	WREC	2016-08-16	Postflower_during_stress	3.3588	T
S09_57166357	1.46	1.2	9	2	1.33	CPG9.18	57166357	H_m	KARE, WREC	2016-08-30, 2016-09-01	control, Preflower_during_recovery	6.26552	T
S09_57172446	1.91	1.06	9	4	1.57	CPG9.18	57172446	Bwet, H_m, B65	WREC	2016-08-23, 2016-08-30, 2016-09-13	Preflower_during_recovery	6.08073	T
S09_57172609	2.04	1.09	9	8	1.33	CPG9.18	57172609	H_m, B65	KARE, WREC	2016-09-01, 2016-09-13, 2016-09-15, 2016-09-08, 2016-08-23, 2016-08-30	control, Preflower_during_recovery	7.15447	T
S09_57178151	1.04	1.04	9	1	1.04	CPG9.18	57178151	H_m	WREC	2016-08-30	Preflower_during_recovery	6.53148	T
S09_57188683	3.42	1.04	9	8	1.42	CPG9.18	57188683	Bwet, H_m, B65	WREC	2016-09-20, 2016-08-23, 2016-08-30, 2016-09-13	Postflower_during_stress, control, Preflower_during_recovery	6.17689	T
S09_57188757	1.28	1.21	9	2	1.25	CPG9.18	57188757	H_m, B65	WREC	2016-08-30, 2016-09-13	control, Preflower_during_recovery	3.85045	T
S09_57188779	1.39	1.39	9	1	1.39	CPG9.18	57188779	H_m	WREC	2016-08-30	Preflower_during_recovery	3.36614	T
S09_57203132	2.7	1.1	9	10	1.26	CPG9.18	57203132	Bwet, H_m, B65	KARE, WREC	2016-09-13, 2016-09-15, 2016-08-09, 2016-09-20, 2016-09-21, 2016-09-08, 2016-08-30	Postflower_during_stress, control, Preflower_during_recovery	4.17244	T
S09_57212498	2.54	1.02	9	32	1.4	CPG9.18	57212498	Bwet, H_m, B65	KARE, WREC	2016-08-16, 2016-09-13, 2016-09-15, 2016-09-20, 2016-09-06, 2016-08-23, 2016-08-02, 2016-08-30	Postflower_during_stress, control, Preflower_during_recovery	6.20269	T
S09_57217161	1.1	1.1	9	1	1.1	CPG9.18	57217161	H_m	WREC	2016-08-30	Preflower_during_recovery	2.64759	T
S09_57222330	1.23	1.23	9	1	1.23	CPG9.18	57222330	B65	WREC	2016-08-09	control	4.31092	T
S09_57239688	1.65	1.65	9	1	1.65	CPG9.18	57239688	Bwet	WREC	2016-08-23	Preflower_during_recovery	3.95939	T
S09_57240259	2.54	1.02	9	7	1.15	CPG9.18	57240259	Bwet, H_m, B65	KARE, WREC	2016-09-15, 2016-08-09, 2016-09-20, 2016-08-30, 2016-09-13	Postflower_during_stress, control, Preflower_during_recovery	4.97598	T
S09_57247175	1.61	1.01	9	10	1.23	CPG9.18	57247175	Bwet, H_m, B65	KARE, WREC	2016-08-16, 2016-09-13, 2016-09-15, 2016-08-09, 2016-09-20, 2016-09-08, 2016-08-30, 2016-07-22	Postflower_during_stress, control, Preflower_during_recovery	3.68323	T
S09_57270573	1.22	1.07	9	2	1.15	CPG9.18	57270573	Bwet, B65	KARE, WREC	2016-08-09, 2016-07-22	Postflower_during_stress, control	4.29041	T
S09_57304536	1.41	1.34	9	2	1.37	CPG9.18	57304536	H_m, B65	KARE	2016-09-15, 2016-07-22	Postflower_during_stress	3.02028	T
S09_57305321	1.81	1.11	9	5	1.14	CPG9.18	57305321	Bwet, H_m, B65	WREC	2016-09-13, 2016-08-30, 2016-08-23	Preflower_during_recovery	6.57103	T
S09_57323641	2.24	1.12	9	9	1.72	CPG9.18	57323641	Bwet, H_m, B65	KARE, WREC	2016-08-16, 2016-09-01, 2016-09-13, 2016-09-20, 2016-08-23, 2016-08-30	control, Preflower_during_recovery	6.00822	T
S09_57324019	2.62	1.04	9	10	1.15	CPG9.18	57324019	Bwet, H_m, B65	WREC, KARE	2016-08-16, 2016-09-13, 2016-09-01, 2016-08-11, 2016-08-23, 2016-08-30	Postflower_during_stress, control, Preflower_during_recovery	6.28068	T
S09_57327912	1.5	1.5	9	1	1.5	CPG9.18	57327912	B65	WREC	2016-08-09	control	7.06807	T
S09_57332088	1.66	1.66	9	1	1.66	CPG9.18	57332088	B65	WREC	2016-08-09	control	6.47486	T
S09_57338386	1.79	1.17	9	2	1.48	CPG9.18	57338386	Bwet, B65	WREC	2016-08-09	control	6.24089	T
S09_57340785	2.21	1.23	9	2	1.72	CPG9.18	57340785	Bwet, B65	WREC	2016-08-09	control	8.15365	T
S09_57342516	2.43	1.02	9	9	1.66	CPG9.18	57342516	Bwet, H_m, B65	WREC	2016-08-09, 2016-08-30, 2016-08-23	control, Preflower_during_recovery	7.10298	T
S09_57352679	2.63	1.15	9	6	1.29	CPG9.18	57352679	B65	WREC	2016-08-23	control	2.96299	T
S09_57363115	2	1.01	9	4	1.29	CPG9.18	57363115	Bwet, B65	WREC	2016-09-20, 2016-08-23, 2016-09-13	Preflower_during_recovery	6.38004	T
S09_57366153	1.51	1.03	9	11	1.26	CPG9.18	57366153	Bwet, LAI, H_m, B65	KARE, WREC	2016-09-13, 2016-09-15, 2016-09-06, 2016-08-23, 2016-08-02, 2016-08-30	control, Preflower_during_recovery	4.71292	T
S09_57366195	1.26	1.01	9	7	1.08	CPG9.18	57366195	Bwet, LAI, H_m, B65	KARE, WREC	2016-09-13, 2016-09-15, 2016-09-06, 2016-09-08, 2016-08-23, 2016-08-02	Postflower_during_stress, control, Preflower_during_recovery	2.5785	T
S09_57369245	1.26	1.26	9	1	1.26	CPG9.18	57369245	B65	WREC	2016-08-23	control	6.08066	T
S09_57377868	1.41	1.02	9	6	1.31	CPG9.18	57377868	Bwet, H_m, B65	KARE, WREC	2016-09-21, 2016-08-30, 2016-08-23	Postflower_during_stress, control, Preflower_during_recovery	9.1114	T
S09_57420082	1.22	1	9	3	1.09	CPG9.18	57420082	Bwet, H_m, B65	WREC	2016-08-09, 2016-08-30	Postflower_during_stress, control, Preflower_during_recovery	7.49729	T
S09_57421446	1.99	1.21	9	7	1.44	CPG9.18	57421446	Bwet, H_m, B65	WREC	2016-08-23, 2016-08-30, 2016-09-13	Postflower_during_stress, control, Preflower_during_recovery	8.76487	T
S09_57434537	1.18	1.09	9	2	1.14	CPG9.18	57434537	B65	WREC	2016-07-22, 2016-07-26	Preflower_during_stress	3.94397	T
S09_57434603	1.13	1.13	9	1	1.13	CPG9.18	57434603	Bwet	WREC	2016-08-16	Postflower_during_stress	5.01423	T
S09_57434878	1.19	1.19	9	1	1.19	CPG9.18	57434878	Bwet	WREC	2016-08-23	Preflower_during_recovery	4.27506	T
S09_57440991	2.04	1.08	9	4	1.15	CPG9.18	57440991	Bwet, H_m, B65	WREC	2016-08-09, 2016-08-30, 2016-08-23	Postflower_during_stress, control, Preflower_during_recovery	6.86033	T
S09_57441008	2.04	1.08	9	4	1.15	CPG9.18	57441008	Bwet, H_m, B65	WREC	2016-08-09, 2016-08-30, 2016-08-23	Postflower_during_stress, control, Preflower_during_recovery	6.86033	T
S09_57463591	1.03	1.03	9	1	1.03	CPG9.18	57463591	Bwet	WREC	2016-08-23	control	4.76756	T
S09_57470027	1.2	1.2	9	1	1.2	CPG9.18	57470027	B65	WREC	2016-08-23	Preflower_during_recovery	4.18622	T
S09_57470082	1.34	1.34	9	1	1.34	CPG9.18	57470082	H_m	WREC	2016-08-30	Preflower_during_recovery	10.7639	T
S09_57470095	1.23	1.2	9	2	1.21	CPG9.18	57470095	B65	WREC	2016-08-16, 2016-08-09	Postflower_during_stress, control	4.31167	T
S09_57488064	1.98	1.01	9	5	1.04	CPG9.18	57488064	Bwet, H_m, B65	KARE, WREC	2016-09-21, 2016-08-30, 2016-08-23	Postflower_during_stress, control, Preflower_during_recovery	8.12163	T
S09_57488772	1.46	1.02	9	4	1.27	CPG9.18	57488772	H_m, B65	WREC	2016-08-16, 2016-08-09, 2016-08-30, 2016-09-13	Postflower_during_stress, Preflower_during_recovery	10.2683	T
S09_57489170	1.53	1.01	9	3	1.35	CPG9.18	57489170	H_m, B65	WREC	2016-09-13, 2016-08-30, 2016-08-23	Postflower_during_stress, Preflower_during_recovery	9.34058	T
S09_57489222	1.53	1.01	9	3	1.35	CPG9.18	57489222	H_m, B65	WREC	2016-09-13, 2016-08-30, 2016-08-23	Postflower_during_stress, Preflower_during_recovery	9.34058	T
S09_57498003	2.06	2.06	9	1	2.06	CPG9.18	57498003	B65	WREC	2016-08-09	Postflower_during_stress	10.7635	T
S09_57511211	1.09	1.09	9	2	1.09	CPG9.19	57511211	Bwet, H_m	KARE	2016-09-01, 2016-07-28	Postflower_during_stress, control	1.51243	T
S09_57511253	1.98	1.09	9	5	1.11	CPG9.19	57511253	H_m, B65	WREC, KARE	2016-08-09, 2016-07-22, 2016-07-28	control	1.79594	T
S09_57513460	2.73	1.02	9	16	1.24	CPG9.19	57513460	Bwet, LAI, H_m, B65	KARE, WREC	2016-09-01, 2016-09-15, 2016-08-09, 2016-08-25, 2016-09-06, 2016-08-18, 2016-09-08, 2016-08-23, 2016-08-30	control, Preflower_during_recovery	6.64547	T
S09_57513472	1.14	1.04	9	4	1.09	CPG9.19	57513472	H_m	KARE, WREC	2016-09-15, 2016-08-30, 2016-09-21, 2016-07-28	control, Preflower_during_recovery	2.99022	T
S09_57513652	2.35	1.04	9	6	1.26	CPG9.19	57513652	Bwet, H_m	KARE, WREC	2016-08-09, 2016-08-11, 2016-08-30, 2016-09-01	control, Preflower_during_recovery	4.6307	T
S09_57513684	1.03	1	9	2	1.02	CPG9.19	57513684	Bwet, B65	WREC	2016-08-23	Preflower_during_recovery	4.10062	T
S09_57517028	1.07	1.07	9	1	1.07	CPG9.19	57517028	H_m	WREC	2016-08-30	Preflower_during_recovery	5.98908	T
S09_57520555	1.34	1.23	9	2	1.29	CPG9.19	57520555	LAI, B65	KARE	2016-08-25, 2016-08-11	control, Preflower_during_recovery	6.0313	T
S09_57525342	1.04	1.04	9	1	1.04	CPG9.19	57525342	H_m	WREC	2016-08-30	Preflower_during_recovery	7.01171	T
S09_57525344	1.04	1.04	9	1	1.04	CPG9.19	57525344	H_m	WREC	2016-08-30	Preflower_during_recovery	7.01171	T
S09_57530765	1.28	1	9	5	1.11	CPG9.19	57530765	Bwet, H_m, B65	KARE, WREC	2016-08-16, 2016-08-18	Postflower_during_stress, control	4.27993	T
S09_57530900	1.2	1.2	9	1	1.2	CPG9.19	57530900	B65	WREC	2016-09-13	Postflower_during_stress	3.19078	T
S09_57540673	2.46	1.01	9	23	1.38	CPG9.19	57540673	Bwet, H_m, B65	WREC, KARE	2016-08-16, 2016-08-11, 2016-09-01, 2016-09-20, 2016-09-06, 2016-08-18, 2016-08-30, 2016-07-22	Postflower_during_stress, control, Preflower_during_recovery	5.72297	T
S09_57540689	2.46	1.01	9	23	1.38	CPG9.19	57540689	Bwet, H_m, B65	WREC, KARE	2016-08-16, 2016-08-11, 2016-09-01, 2016-09-20, 2016-09-06, 2016-08-18, 2016-08-30, 2016-07-22	Postflower_during_stress, control, Preflower_during_recovery	5.72297	T
S09_57540793	3.06	1.02	9	14	1.33	CPG9.19	57540793	Bwet, H_m, B65	WREC	2016-08-16, 2016-09-13, 2016-08-09, 2016-09-06, 2016-08-23, 2016-08-30	Postflower_during_stress, Preflower_during_recovery	8.8714	T
S09_57540804	2.03	1.1	9	5	1.52	CPG9.19	57540804	Bwet, H_m, B65	WREC	2016-08-16, 2016-09-06, 2016-08-30, 2016-09-13	Postflower_during_stress, Preflower_during_recovery	4.04282	T
S09_57540837	2.48	1.01	9	12	1.17	CPG9.19	57540837	Bwet, H_m, B65	WREC, KARE	2016-08-16, 2016-09-01, 2016-08-11, 2016-08-09, 2016-09-06, 2016-07-26, 2016-08-30	Postflower_during_stress, Postflower_no_stress, control, Preflower_during_recovery	7.88275	T
S09_57541026	1.49	1.49	9	1	1.49	CPG9.19	57541026	B65	WREC	2016-08-16	Postflower_during_stress	3.45595	T
S09_57541114	2.2	1.08	9	6	1.31	CPG9.19	57541114	Bwet, H_m, B65	WREC	2016-08-16, 2016-09-06, 2016-08-30, 2016-09-13	Postflower_during_stress, Preflower_during_recovery	3.9537	T
S09_57541193	1.88	1.15	9	4	1.49	CPG9.19	57541193	Bwet, H_m, B65	WREC	2016-08-16, 2016-09-06, 2016-08-30	Postflower_during_stress, Preflower_during_recovery	6.18257	T
S09_57542596	1.24	1.04	9	2	1.14	CPG9.19	57542596	Bwet	KARE	2016-07-22	control	2.54017	T
S09_57542607	1.24	1.04	9	2	1.14	CPG9.19	57542607	Bwet	KARE	2016-07-22	control	2.54017	T
S09_57544917	4.84	1.02	9	56	1.3	CPG9.19	57544917	Bwet, LAI, H_m, B65	KARE, WREC	2016-08-16, 2016-09-13, 2016-09-01, 2016-08-11, 2016-08-09, 2016-09-15, 2016-09-20, 2016-08-25, 2016-07-28, 2016-09-21, 2016-09-06, 2016-08-18, 2016-09-08, 2016-08-23, 2016-07-26, 2016-08-30, 2016-07-22	Postflower_during_stress, Postflower_no_stress, control, Preflower_during_recovery	6.36574	T
S09_57545053	2.52	1.03	9	17	1.38	CPG9.19	57545053	Bwet, H_m, B65	KARE, WREC	2016-08-16, 2016-09-13, 2016-09-01, 2016-08-09, 2016-09-20, 2016-09-06, 2016-08-18, 2016-08-23, 2016-08-30, 2016-07-22	Postflower_during_stress, control, Preflower_during_recovery	4.94482	T
S09_57563232	1.04	1.04	9	1	1.04	CPG9.19	57563232	B65	WREC	2016-08-16	Postflower_during_stress	3.51254	T
S09_57563236	1.04	1.04	9	1	1.04	CPG9.19	57563236	B65	WREC	2016-08-16	Postflower_during_stress	3.51254	T
S09_57563281	1.04	1.04	9	1	1.04	CPG9.19	57563281	B65	WREC	2016-08-16	Postflower_during_stress	3.51254	T
S09_57575501	1.67	1.01	9	3	1.01	CPG9.19	57575501	Bwet, B65	WREC	2016-08-16, 2016-08-30	Postflower_during_stress, Preflower_during_recovery	7.31309	T
S09_57575540	2.27	1.04	9	17	1.43	CPG9.19	57575540	Bwet, H_m, B65	WREC, KARE	2016-08-16, 2016-09-01, 2016-09-13, 2016-08-11, 2016-07-28, 2016-09-06, 2016-08-18, 2016-08-30	Postflower_during_stress, control, Preflower_during_recovery	7.00352	T
S09_57575548	2.27	1.04	9	17	1.43	CPG9.19	57575548	Bwet, H_m, B65	WREC, KARE	2016-08-16, 2016-09-01, 2016-09-13, 2016-08-11, 2016-07-28, 2016-09-06, 2016-08-18, 2016-08-30	Postflower_during_stress, control, Preflower_during_recovery	7.00352	T
S09_57575587	2.27	1.04	9	17	1.43	CPG9.19	57575587	Bwet, H_m, B65	WREC, KARE	2016-08-16, 2016-09-01, 2016-09-13, 2016-08-11, 2016-07-28, 2016-09-06, 2016-08-18, 2016-08-30	Postflower_during_stress, control, Preflower_during_recovery	7.00352	T
S09_57575637	1.45	1.08	9	5	1.12	CPG9.19	57575637	Bwet, H_m, B65	WREC	2016-08-16, 2016-08-30	Postflower_during_stress, Preflower_during_recovery	8.82108	T
S09_57590196	1.81	1.11	9	2	1.46	CPG9.19	57590196	Bwet, B65	WREC	2016-08-23	Preflower_during_recovery	1.50856	T
S09_57611460	1.04	1.02	9	2	1.03	CPG9.19	57611460	Bwet, H_m	WREC	2016-08-30	Preflower_during_recovery	8.94058	T
S09_57622875	1.28	1.22	9	2	1.25	CPG9.19	57622875	Bwet, B65	WREC	2016-08-16	Postflower_during_stress	3.25305	T
S09_57622876	1.28	1.22	9	2	1.25	CPG9.19	57622876	Bwet, B65	WREC	2016-08-16	Postflower_during_stress	3.25305	T
S09_57622878	1.28	1.22	9	2	1.25	CPG9.19	57622878	Bwet, B65	WREC	2016-08-16	Postflower_during_stress	3.25305	T
S09_57641799	1.37	1.13	9	2	1.25	CPG9.19	57641799	Bwet, B65	WREC	2016-08-16	Postflower_during_stress	4.86942	T
S09_57641855	1.71	1.52	9	2	1.62	CPG9.19	57641855	Bwet, B65	WREC	2016-08-16	Postflower_during_stress	5.07922	T
S09_57641925	1.73	1.01	9	8	1.31	CPG9.19	57641925	Bwet, LAI, H_m, B65	WREC, KARE	2016-08-30, 2016-08-23, 2016-09-01, 2016-08-11	Postflower_during_stress, Preflower_during_recovery	8.20215	T
S09_57641937	1.01	1.01	9	1	1.01	CPG9.19	57641937	Bwet	WREC	2016-08-23	Preflower_during_recovery	7.04036	T
S09_57641941	1.01	1.01	9	1	1.01	CPG9.19	57641941	Bwet	WREC	2016-08-23	Preflower_during_recovery	7.04036	T
S09_57642160	1.83	1.2	9	2	1.52	CPG9.19	57642160	Bwet	WREC	2016-08-16, 2016-08-23	Preflower_during_recovery	5.45474	T
S09_57647501	4.88	1.07	9	14	2.06	CPG9.19	57647501	H_m	KARE	2016-08-11	Preflower_during_recovery	5.20222	T
S09_57657373	1.55	1.08	9	2	1.31	CPG9.19	57657373	H_m, B65	WREC	2016-08-30	Preflower_during_recovery	6.18163	T
S09_57657375	1.55	1.08	9	2	1.31	CPG9.19	57657375	H_m, B65	WREC	2016-08-30	Preflower_during_recovery	6.18163	T
S09_57660044	1.59	1.59	9	1	1.59	CPG9.19	57660044	B65	WREC	2016-08-16	Postflower_during_stress	3.2607	T
S09_57666338	1.88	1	9	6	1.06	CPG9.19	57666338	Bwet, H_m, B65	WREC	2016-08-16, 2016-08-09, 2016-08-30	Postflower_during_stress, control, Preflower_during_recovery	9.93097	T
S09_57670230	2.27	2.27	9	1	2.27	CPG9.19	57670230	B65	WREC	2016-08-16	Postflower_during_stress	2.58426	T
S09_57670262	2.27	2.27	9	1	2.27	CPG9.19	57670262	B65	WREC	2016-08-16	Postflower_during_stress	2.58426	T
S09_57670282	2.03	2.03	9	1	2.03	CPG9.19	57670282	B65	WREC	2016-08-16	Postflower_during_stress	2.40256	T
S09_57670672	2.21	2.21	9	1	2.21	CPG9.19	57670672	B65	WREC	2016-08-16	Postflower_during_stress	2.53274	T
S09_57681486	1.78	1.78	9	1	1.78	CPG9.19	57681486	B65	WREC	2016-08-16	Postflower_during_stress	2.08932	T
S09_57683340	1.35	1.35	9	1	1.35	CPG9.19	57683340	B65	WREC	2016-08-09	Postflower_during_stress	6.66136	T
S09_57683354	1.35	1.35	9	1	1.35	CPG9.19	57683354	B65	WREC	2016-08-09	Postflower_during_stress	6.66136	T
S09_57683381	1.35	1.35	9	1	1.35	CPG9.19	57683381	B65	WREC	2016-08-09	Postflower_during_stress	6.66136	T
S09_57684260	1.77	1.77	9	1	1.77	CPG9.19	57684260	B65	WREC	2016-08-16	Postflower_during_stress	7.02265	T
S09_57687969	1.39	1.04	9	2	1.22	CPG9.19	57687969	Bwet, H_m	KARE, WREC	2016-08-30, 2016-08-11	Postflower_during_stress, Preflower_during_recovery	8.45499	T
S09_57696382	1.74	1.04	9	3	1.36	CPG9.19	57696382	Bwet, B65	WREC, KARE	2016-08-09, 2016-08-11	control	4.32885	T
S09_57708044	1.51	1.03	9	5	1.27	CPG9.19	57708044	Bwet, LAI, B65	KARE, WREC	2016-08-11, 2016-09-01, 2016-08-23	Postflower_during_stress, Preflower_during_recovery	9.79592	T
S09_57717096	1.19	1.19	9	1	1.19	CPG9.19	57717096	B65	WREC	2016-08-16	Postflower_during_stress	1.7882	T
S09_57737692	1.52	1.52	9	1	1.52	CPG9.20	57737692	Bwet	WREC	2016-08-16	Postflower_during_stress	4.26121	T
S09_57745418	1.25	1.23	9	2	1.24	CPG9.20	57745418	Bwet, B65	WREC	2016-08-16	Postflower_during_stress	3.21508	T
S09_57745526	1.78	1.04	9	3	1.43	CPG9.20	57745526	Bwet, B65	KARE, WREC	2016-08-09, 2016-07-22	Postflower_during_stress, control	7.49696	T
S09_57745578	2.24	1.17	9	3	1.46	CPG9.20	57745578	Bwet, B65	KARE, WREC	2016-08-09, 2016-07-22	Postflower_during_stress, control	5.9834	T
S09_57745590	2.24	1.17	9	3	1.46	CPG9.20	57745590	Bwet, B65	KARE, WREC	2016-08-09, 2016-07-22	Postflower_during_stress, control	5.9834	T
S09_57752751	1.26	1.24	9	2	1.25	CPG9.20	57752751	Bwet, B65	WREC	2016-08-16	Postflower_during_stress	2.69019	T
S09_57752787	1.26	1.24	9	2	1.25	CPG9.20	57752787	Bwet, B65	WREC	2016-08-16	Postflower_during_stress	2.69019	T
S09_57752801	1.33	1.24	9	2	1.28	CPG9.20	57752801	Bwet, B65	WREC	2016-08-16	Postflower_during_stress	2.99209	T
S09_57752802	1.33	1.24	9	2	1.28	CPG9.20	57752802	Bwet, B65	WREC	2016-08-16	Postflower_during_stress	2.99209	T
S09_57752804	1.33	1.24	9	2	1.28	CPG9.20	57752804	Bwet, B65	WREC	2016-08-16	Postflower_during_stress	2.99209	T
S09_57753567	1.68	1.02	9	7	1.13	CPG9.20	57753567	Bwet, B65	WREC	2016-08-16, 2016-09-20, 2016-08-30	Postflower_during_stress, control, Preflower_during_recovery	2.51976	T
S09_57771040	1.14	1.02	9	2	1.08	CPG9.20	57771040	Bwet, B65	KARE, WREC	2016-07-22, 2016-08-23	Postflower_during_stress, Preflower_during_recovery	7.26105	T
S09_57776578	1.01	1.01	9	1	1.01	CPG9.20	57776578	B65	WREC	2016-08-16	Postflower_during_stress	2.52277	T
S09_57783286	1.32	1.05	9	5	1.21	CPG9.20	57783286	Bwet, B65	WREC	2016-09-20, 2016-08-30, 2016-09-13	Preflower_during_recovery	4.64797	T
S09_57783331	1.32	1.05	9	5	1.21	CPG9.20	57783331	Bwet, B65	WREC	2016-09-20, 2016-08-30, 2016-09-13	Preflower_during_recovery	4.64797	T
S09_57787432	1.42	1.08	9	3	1.14	CPG9.20	57787432	Bwet, LAI	WREC	2016-08-09, 2016-08-30, 2016-08-23	control, Preflower_during_recovery	6.05373	T
S09_57791592	1.2	1.2	9	1	1.2	CPG9.20	57791592	Bwet	WREC	2016-08-23	Preflower_during_recovery	8.76286	T
S09_57792171	1.11	1	9	3	1.03	CPG9.20	57792171	Bwet, B65	WREC	2016-08-09, 2016-08-30	control, Preflower_during_recovery	6.43654	T
S09_57792330	1.25	1.25	9	1	1.25	CPG9.20	57792330	B65	WREC	2016-08-16	control	3.18004	T
S09_57804067	1.27	1.15	9	2	1.21	CPG9.20	57804067	Bwet	WREC	2016-08-30, 2016-08-23	Preflower_during_recovery	8.84866	T
S09_57807056	1.02	1.02	9	1	1.02	CPG9.20	57807056	B65	WREC	2016-08-09	Postflower_during_stress	8.75526	T
S09_57810974	1.72	1.72	9	1	1.72	CPG9.20	57810974	B65	WREC	2016-08-09	Postflower_during_stress	7.57399	T
S09_57811757	1.35	1.12	9	4	1.22	CPG9.20	57811757	Bwet, H_m, B65	KARE, WREC	2016-08-23, 2016-08-30, 2016-08-11	Postflower_during_stress, Preflower_during_recovery	7.1971	T
S09_57811775	1.39	1.1	9	5	1.34	CPG9.20	57811775	Bwet, H_m, B65	KARE, WREC	2016-08-11, 2016-08-30, 2016-08-23	Postflower_during_stress, Preflower_during_recovery	8.27326	T
S09_57812192	1.21	1.21	9	1	1.21	CPG9.20	57812192	Bwet	WREC	2016-08-30	Preflower_during_recovery	2.35279	T
S09_57833973	1.62	1.21	9	5	1.28	CPG9.20	57833973	Bwet, LAI, H_m	KARE, WREC	2016-09-01, 2016-08-23, 2016-08-30, 2016-08-11	Postflower_during_stress, Preflower_during_recovery	7.16982	T
S09_57839854	1.32	1.14	9	2	1.23	CPG9.20	57839854	H_m, B65	KARE	2016-09-15, 2016-08-11	control	4.18397	T
S09_57843791	1.58	1.58	9	1	1.58	CPG9.20	57843791	Bwet	WREC	2016-08-30	Preflower_during_recovery	3.05759	T
S09_57856508	1.12	1.12	9	1	1.12	CPG9.20	57856508	B65	KARE	2016-08-11	control	1.47987	T
S09_57856529	1.12	1.12	9	1	1.12	CPG9.20	57856529	B65	KARE	2016-08-11	control	1.47987	T
S09_57859073	1.16	1.16	9	1	1.16	CPG9.20	57859073	Bwet	WREC	2016-08-30	Preflower_during_recovery	3.59725	T
S09_57879627	1.38	1.38	9	1	1.38	CPG9.20	57879627	Bwet	WREC	2016-08-09	control	7.91966	T
S09_57892385	1.46	1.46	9	1	1.46	CPG9.20	57892385	Bwet	WREC	2016-08-30	Preflower_during_recovery	4.95608	T
S09_57894247	1	1	9	1	1	CPG9.20	57894247	Bwet	WREC	2016-08-23	Preflower_during_recovery	5.05221	T
S09_57894262	1	1	9	1	1	CPG9.20	57894262	Bwet	WREC	2016-08-23	Preflower_during_recovery	5.05221	T
S09_57907179	1.07	1.07	9	1	1.07	CPG9.20	57907179	Bwet	WREC	2016-08-30	Preflower_during_recovery	4.76455	T
S09_57914531	1.08	1.08	9	1	1.08	CPG9.20	57914531	Bwet	WREC	2016-08-30	Preflower_during_recovery	4.03853	T
S09_57919263	1.04	1.04	9	1	1.04	CPG9.20	57919263	B65	WREC	2016-08-09	Postflower_during_stress	7.31796	T
S09_57925883	1.94	1.21	9	2	1.58	CPG9.20	57925883	Bwet	WREC	2016-08-30, 2016-08-23	Preflower_during_recovery	9.61999	T
S09_57934446	1.71	1.14	9	2	1.42	CPG9.20	57934446	Bwet, B65	WREC	2016-08-09	control	8.91511	T
S09_57936077	1.82	1.82	9	1	1.82	CPG9.20	57936077	B65	WREC	2016-08-09	Postflower_during_stress	8.73199	T
S09_57956802	1.11	1.11	9	1	1.11	CPG9.20	57956802	Bwet	KARE	2016-08-11	Postflower_during_stress	2.1278	T
S09_57983392	1.61	1.61	9	1	1.61	CPG9.20	57983392	Bwet	WREC	2016-08-23	Preflower_during_recovery	7.03528	T
S09_58013705	1.25	1.25	9	1	1.25	CPG9.20	58013705	Bwet	WREC	2016-08-09	control	7.13275	T
S09_58016655	1.38	1.38	9	1	1.38	CPG9.20	58016655	Bwet	WREC	2016-08-09	control	7.19164	T
S09_58016703	1.38	1.38	9	1	1.38	CPG9.20	58016703	Bwet	WREC	2016-08-09	control	7.19164	T
S09_58016904	1.07	1.07	9	1	1.07	CPG9.20	58016904	Bwet	WREC	2016-08-09	control	8.152	T
S09_58016907	1.07	1.07	9	1	1.07	CPG9.20	58016907	Bwet	WREC	2016-08-09	control	8.152	T
S09_58021463	1.1	1.1	9	1	1.1	CPG9.20	58021463	Bwet	WREC	2016-08-09	control	1.75944	T
S09_58047562	1.31	1.31	9	1	1.31	CPG9.20	58047562	Bwet	WREC	2016-08-09	control	1.59374	T
S09_58049784	1.35	1.35	9	1	1.35	CPG9.20	58049784	B65	WREC	2016-08-09	Postflower_during_stress	10.8284	T
S09_58070704	1.41	1.41	9	1	1.41	CPG9.20	58070704	Bwet	WREC	2016-08-09	control	2.97969	T
S09_58070717	1.41	1.41	9	1	1.41	CPG9.20	58070717	Bwet	WREC	2016-08-09	control	2.97969	T
S09_58070718	1.41	1.41	9	1	1.41	CPG9.20	58070718	Bwet	WREC	2016-08-09	control	2.97969	T
S09_58070798	1.26	1.26	9	1	1.26	CPG9.20	58070798	Bwet	WREC	2016-08-23	Preflower_during_recovery	9.48522	T
S09_58070949	1.94	1.09	9	5	1.46	CPG9.20	58070949	Bwet, B65	WREC	2016-08-16, 2016-08-09	control	3.13473	T
S09_58079080	1.02	1.02	9	1	1.02	CPG9.20	58079080	H_m	KARE	2016-09-08	Postflower_during_stress	3.79321	T
S09_58095227	2.16	1.36	9	3	1.55	CPG9.20	58095227	Bwet, H_m, B65	WREC	2016-08-09, 2016-08-30	control, Preflower_during_recovery	10.9247	T
S09_58104568	2.85	1.27	9	5	1.56	CPG9.20	58104568	H_m, B65	WREC	2016-08-16, 2016-08-09	control	1.96726	T
S09_58160745	1.25	1.25	9	1	1.25	CPG9.20	58160745	Bwet	WREC	2016-08-09	Preflower_during_recovery	5.7669	T
S09_58161622	1.17	1.07	9	3	1.1	CPG9.20	58161622	H_m, B65	WREC	2016-08-16, 2016-07-22, 2016-07-26	Postflower_during_stress, Postflower_no_stress	3.46534	T
S09_58167881	1.85	1.27	9	2	1.56	CPG9.20	58167881	Bwet	WREC	2016-08-09, 2016-08-23	control, Preflower_during_recovery	11.2717	T
S09_58167882	1.85	1.27	9	2	1.56	CPG9.20	58167882	Bwet	WREC	2016-08-09, 2016-08-23	control, Preflower_during_recovery	11.2717	T
S09_58170106	1.45	1.45	9	1	1.45	CPG9.20	58170106	B65	WREC	2016-08-16	Postflower_during_stress	3.23846	T
S09_58174206	1.74	1.74	9	1	1.74	CPG9.20	58174206	Bwet	WREC	2016-08-09	control	12.1155	T
S09_58178365	1.54	1.54	9	1	1.54	CPG9.20	58178365	B65	WREC	2016-08-16	Postflower_during_stress	3.29203	T
S09_58202777	1.1	1.1	9	1	1.1	CPG9.20	58202777	Bwet	WREC	2016-08-09	control	9.91357	T
S09_58216723	2.87	1.09	9	4	1.43	CPG9.20	58216723	Bwet, B65	WREC	2016-08-02, 2016-08-30, 2016-08-23	Preflower_during_recovery	5.48814	T
S09_58246148	1.61	1.47	9	3	1.59	CPG9.20	58246148	Bwet, H_m	WREC	2016-07-06, 2016-07-12, 2016-08-23	Postflower_no_stress, Preflower_during_recovery	5.01945	T
S09_58246160	1.61	1.47	9	3	1.59	CPG9.20	58246160	Bwet, H_m	WREC	2016-07-06, 2016-07-12, 2016-08-23	Postflower_no_stress, Preflower_during_recovery	5.01945	T
S09_58246328	1.79	1.79	9	1	1.79	CPG9.20	58246328	Bwet	WREC	2016-08-23	Preflower_during_recovery	8.37006	T
S09_58258921	1.27	1.27	9	1	1.27	CPG9.20	58258921	Bwet	WREC	2016-08-23	Preflower_during_recovery	7.44342	T
S09_58259988	1.89	1.89	9	1	1.89	CPG9.20	58259988	Bwet	WREC	2016-08-23	Preflower_during_recovery	10.1479	T
S09_58268988	1.43	1.43	9	1	1.43	CPG9.20	58268988	Bwet	WREC	2016-08-09	control	5.17626	T
S09_58272432	1.01	1.01	9	1	1.01	CPG9.20	58272432	Bwet	WREC	2016-08-23	Preflower_during_recovery	9.15952	T
S09_58291523	1.28	1.28	9	1	1.28	CPG9.20	58291523	Bwet	WREC	2016-08-30	Preflower_during_recovery	2.82541	T
S09_58293186	2.7	2.7	9	1	2.7	CPG9.20	58293186	Bwet	WREC	2016-08-09	control	17.2648	T
S09_58293203	2.7	2.7	9	1	2.7	CPG9.20	58293203	Bwet	WREC	2016-08-09	control	17.2648	T
S09_58293266	2.66	1.15	9	3	1.5	CPG9.20	58293266	Bwet, B65	WREC	2016-08-09, 2016-08-23	Postflower_during_stress, control, Preflower_during_recovery	12.392	T
S09_58295230	3.21	1.17	9	3	1.79	CPG9.20	58295230	Bwet, B65	WREC	2016-08-09, 2016-08-23	control, Preflower_during_recovery	16.0879	T
S09_58295272	1.42	1.42	9	1	1.42	CPG9.20	58295272	Bwet	WREC	2016-08-09	control	11.5867	T
S09_58320360	1.08	1.08	9	1	1.08	CPG9.20	58320360	Bwet	WREC	2016-08-09	control	4.16246	T
S09_58320737	1.12	1.12	9	1	1.12	CPG9.20	58320737	Bwet	WREC	2016-08-09	control	3.75935	T
S09_58329632	1.1	1.1	9	1	1.1	CPG9.20	58329632	Bwet	WREC	2016-08-09	control	4.22439	T
S09_58332316	1.52	1.37	9	2	1.44	CPG9.20	58332316	B65	WREC	2016-08-16, 2016-08-09	Postflower_during_stress, control	4.15358	T
S09_58368696	1.13	1.13	9	1	1.13	CPG9.20	58368696	Bwet	WREC	2016-08-09	control	10.8424	T
S09_58368979	1.56	1.56	9	1	1.56	CPG9.20	58368979	Bwet	WREC	2016-08-09	control	12.5673	T
S09_58386691	1.2	1.2	9	1	1.2	CPG9.20	58386691	Bwet	WREC	2016-08-23	Preflower_during_recovery	6.56319	T
S09_58413964	1.16	1.16	9	1	1.16	CPG9.20	58413964	Bwet	WREC	2016-08-23	Preflower_during_recovery	7.62963	T
S09_58415684	1.29	1.29	9	1	1.29	CPG9.20	58415684	Bwet	WREC	2016-08-09	control	10.3202	T
S09_58430948	1.44	1.44	9	1	1.44	CPG9.20	58430948	Bwet	WREC	2016-08-23	Preflower_during_recovery	6.22545	T
S09_58430949	1.44	1.44	9	1	1.44	CPG9.20	58430949	Bwet	WREC	2016-08-23	Preflower_during_recovery	6.22545	T
S09_58441836	1.1	1.1	9	1	1.1	CPG9.20	58441836	Bwet	WREC	2016-08-09	control	10.8675	T
S09_58455067	1.59	1.17	9	2	1.38	CPG9.20	58455067	Bwet	WREC	2016-08-09, 2016-08-23	Preflower_during_recovery	4.14046	T
S09_58468997	1.3	1.17	9	3	1.23	CPG9.20	58468997	Bwet, LAI	KARE, WREC	2016-08-30, 2016-08-25, 2016-08-23	Preflower_during_recovery	3.65243	T
S09_58468998	1.3	1.17	9	3	1.23	CPG9.20	58468998	Bwet, LAI	KARE, WREC	2016-08-30, 2016-08-25, 2016-08-23	Preflower_during_recovery	3.65243	T
S09_58485777	1.25	1.25	9	1	1.25	CPG9.20	58485777	Bwet	WREC	2016-08-09	control	7.67946	T
S09_58490091	1.67	1.06	9	4	1.41	CPG9.20	58490091	Bwet, B65	KARE	2016-09-01, 2016-08-11	Preflower_during_recovery	3.68081	T
S09_58504227	2.73	1	9	3	1.72	CPG9.20	58504227	Bwet, B65	WREC	2016-08-09, 2016-08-23	control, Preflower_during_recovery	9.27272	T
S09_58522129	1.12	1.12	9	1	1.12	CPG9.20	58522129	Bwet	WREC	2016-08-23	Preflower_during_recovery	4.22471	T
S09_58528217	1.46	1.46	9	1	1.46	CPG9.20	58528217	Bwet	WREC	2016-08-23	Preflower_during_recovery	4.75294	T
S09_58539152	1.12	1.12	9	1	1.12	CPG9.20	58539152	H_m	WREC	2016-07-06	Postflower_no_stress	7.63803	T
S09_58539522	1.24	1.24	9	1	1.24	CPG9.20	58539522	Bwet	WREC	2016-08-23	Preflower_during_recovery	8.36682	T
S09_58539611	2.04	1.09	9	4	1.3	CPG9.20	58539611	Bwet, B65	WREC	2016-08-09, 2016-08-23	control, Preflower_during_recovery	8.17317	T
S09_58539950	1.27	1.11	9	2	1.19	CPG9.20	58539950	Bwet, B65	WREC	2016-08-02, 2016-08-23	Preflower_during_recovery	5.99318	T
S09_58540112	1.41	1.14	9	2	1.28	CPG9.20	58540112	Bwet	WREC	2016-08-09, 2016-08-23	control, Preflower_during_recovery	7.03027	T
S09_58540294	1.43	1.43	9	1	1.43	CPG9.20	58540294	Bwet	WREC	2016-08-09	control	6.02134	T
S09_58541198	1.5	1.13	9	2	1.31	CPG9.20	58541198	Bwet	WREC	2016-08-09, 2016-08-23	control, Preflower_during_recovery	6.70407	T
S09_58545385	1.01	1.01	9	1	1.01	CPG9.20	58545385	Bwet	WREC	2016-08-23	Preflower_during_recovery	6.8235	T
S09_58551678	1.29	1.29	9	1	1.29	CPG9.20	58551678	Bwet	WREC	2016-08-09	control	3.93222	T
S09_58551687	1.38	1.38	9	1	1.38	CPG9.20	58551687	Bwet	WREC	2016-08-09	control	5.96306	T
S09_58579528	2.37	1.06	9	7	1.16	CPG9.20	58579528	Bwet, H_m, B65	WREC, KARE	2016-08-09, 2016-08-23, 2016-08-30, 2016-08-11	Postflower_during_stress, control, Preflower_during_recovery	9.20493	T
S09_58584028	1.92	1.67	9	4	1.78	CPG9.20	58584028	Bwet, B65	WREC	2016-08-09, 2016-08-30, 2016-08-23	control, Preflower_during_recovery	7.35405	T
S09_58591232	1.74	1.09	9	4	1.43	CPG9.20	58591232	Bwet, B65	WREC, KARE	2016-08-09, 2016-08-23, 2016-08-11	Postflower_during_stress, control, Preflower_during_recovery	8.31155	T
S09_58600484	1.37	1.26	9	2	1.32	CPG9.20	58600484	Bwet, B65	WREC	2016-08-23	Preflower_during_recovery	7.38644	T
S09_58603696	3.11	1.06	9	16	1.36	CPG9.20	58603696	Bwet, LAI, H_m, B65	WREC, KARE	2016-07-14, 2016-09-01, 2016-08-11, 2016-08-09, 2016-08-25, 2016-07-28, 2016-08-23, 2016-08-02, 2016-08-30, 2016-07-22	Postflower_during_stress, Postflower_no_stress, control, Preflower_during_recovery	9.23358	T
S09_58613417	2.2	1.03	9	6	1.57	CPG9.20	58613417	Bwet, LAI, B65	KARE, WREC	2016-08-11, 2016-08-09, 2016-07-28, 2016-08-23, 2016-08-30, 2016-07-22	Postflower_during_stress, control, Preflower_during_recovery	6.62732	T
S09_58619277	1.07	1.07	9	1	1.07	CPG9.20	58619277	B65	KARE	2016-07-28	Preflower_during_recovery	0.520998	T
S09_58634186	2.66	1.04	9	17	1.73	CPG9.20	58634186	Bwet, LAI, B65	WREC, KARE	2016-09-01, 2016-08-11, 2016-08-09, 2016-08-25, 2016-08-18, 2016-08-23, 2016-07-26, 2016-08-02, 2016-08-30, 2016-07-22	Postflower_during_stress, Postflower_no_stress, control, Preflower_during_recovery	8.36896	T
S09_58634316	1.67	1.21	9	2	1.44	CPG9.20	58634316	H_m, B65	WREC	2016-08-23, 2016-09-13	Preflower_during_recovery	5.75973	T
S09_58634748	2.4	1.1	9	12	1.64	CPG9.20	58634748	Bwet, H_m, B65	KARE, WREC	2016-08-16, 2016-09-13, 2016-09-01, 2016-08-11, 2016-08-09, 2016-09-21, 2016-08-23, 2016-08-30	Postflower_during_stress, control, Preflower_during_recovery	7.50173	T
S09_58659506	1.48	1.15	9	3	1.19	CPG9.20	58659506	Bwet, B65	WREC, KARE	2016-08-23, 2016-08-11	Postflower_during_stress, Preflower_during_recovery	5.3592	T
S09_58659594	1.43	1.43	9	1	1.43	CPG9.20	58659594	B65	WREC	2016-08-23	Preflower_during_recovery	3.38953	T
S09_58663164	3.21	1.02	9	14	1.31	CPG9.20	58663164	Bwet, LAI, H_m, B65	WREC	2016-08-16, 2016-09-13, 2016-08-09, 2016-09-06, 2016-08-23, 2016-08-30	Postflower_during_stress, control, Preflower_during_recovery	6.25527	T
S09_58663178	3.21	1.02	9	14	1.31	CPG9.20	58663178	Bwet, LAI, H_m, B65	WREC	2016-08-16, 2016-09-13, 2016-08-09, 2016-09-06, 2016-08-23, 2016-08-30	Postflower_during_stress, control, Preflower_during_recovery	6.25527	T
S09_58663187	2.77	1.02	9	14	1.42	CPG9.20	58663187	Bwet, LAI, H_m, B65	WREC	2016-08-16, 2016-09-13, 2016-08-09, 2016-09-06, 2016-08-23, 2016-08-30	control	4.56005	T
S09_58663199	2.77	1.02	9	14	1.42	CPG9.20	58663199	Bwet, LAI, H_m, B65	WREC	2016-08-16, 2016-09-13, 2016-08-09, 2016-09-06, 2016-08-23, 2016-08-30	control	4.56005	T
S09_58663246	2.77	1.02	9	14	1.42	CPG9.20	58663246	Bwet, LAI, H_m, B65	WREC	2016-08-16, 2016-09-13, 2016-08-09, 2016-09-06, 2016-08-23, 2016-08-30	control	4.56005	T
S09_58668999	1.03	1.03	9	1	1.03	CPG9.20	58668999	H_m	WREC	2016-08-30	Preflower_during_recovery	10.3589	T
S09_58670296	1.21	1.21	9	1	1.21	CPG9.20	58670296	Bwet	WREC	2016-08-30	Preflower_during_recovery	3.03989	T
S09_58675182	1.27	1.27	9	1	1.27	CPG9.20	58675182	Bwet	WREC	2016-08-23	Preflower_during_recovery	6.24308	T
S09_58675269	1.9	1.08	9	2	1.49	CPG9.20	58675269	Bwet	WREC	2016-08-09, 2016-08-30	control, Preflower_during_recovery	9.83492	T
S09_58675271	1.9	1.08	9	2	1.49	CPG9.20	58675271	Bwet	WREC	2016-08-09, 2016-08-30	control, Preflower_during_recovery	9.83492	T
S09_58675272	1.9	1.08	9	2	1.49	CPG9.20	58675272	Bwet	WREC	2016-08-09, 2016-08-30	control, Preflower_during_recovery	9.83492	T
S09_58680316	2.06	2.06	9	1	2.06	CPG9.20	58680316	Bwet	WREC	2016-08-09	control	11.2438	T
S09_58680318	2.06	2.06	9	1	2.06	CPG9.20	58680318	Bwet	WREC	2016-08-09	control	11.2438	T
S09_58680319	2.06	2.06	9	1	2.06	CPG9.20	58680319	Bwet	WREC	2016-08-09	control	11.2438	T
S09_58695567	4.52	1.03	9	16	1.28	CPG9.20	58695567	Bwet, H_m, B65	KARE, WREC	2016-08-16, 2016-09-13, 2016-08-09, 2016-07-28, 2016-08-23, 2016-08-30, 2016-07-22	Postflower_during_stress, control, Preflower_during_recovery	8.82455	T
S09_58699258	1.83	1.83	9	1	1.83	CPG9.20	58699258	Bwet	WREC	2016-08-23	Preflower_during_recovery	6.44816	T
S09_58701442	2.93	1.12	9	2	2.02	CPG9.20	58701442	Bwet	WREC	2016-08-30, 2016-08-23	Preflower_during_recovery	10.4841	T
S09_58702178	3.24	1.02	9	14	1.38	CPG9.20	58702178	Bwet, LAI, H_m, B65	WREC, KARE	2016-07-14, 2016-09-01, 2016-08-11, 2016-08-09, 2016-08-25, 2016-07-28, 2016-07-06, 2016-08-23, 2016-08-02, 2016-08-30, 2016-07-22	Postflower_during_stress, Postflower_no_stress, control, Preflower_during_recovery	7.42873	T
S09_58704648	1.19	1.1	9	2	1.14	CPG9.20	58704648	Bwet, B65	WREC	2016-08-30, 2016-08-23	Preflower_during_recovery	8.04391	T
S09_58704691	1.29	1.29	9	1	1.29	CPG9.20	58704691	Bwet	WREC	2016-08-23	Preflower_during_recovery	7.17179	T
S09_58728008	1.5	1.5	9	1	1.5	CPG9.20	58728008	Bwet	WREC	2016-08-09	control	11.2863	T
S09_58728450	1.36	1.36	9	1	1.36	CPG9.20	58728450	Bwet	WREC	2016-08-09	control	6.52457	T
S09_58738310	1.05	1.05	9	1	1.05	CPG9.20	58738310	Bwet	WREC	2016-08-09	control	5.54192	T
S09_58739946	1.41	1.41	9	1	1.41	CPG9.20	58739946	Bwet	WREC	2016-08-23	Preflower_during_recovery	4.91027	T
S09_58752297	2.12	1.23	9	2	1.68	CPG9.20	58752297	Bwet, LAI	WREC, KARE	2016-08-25, 2016-08-23	Preflower_during_recovery	5.71745	T
S09_58752343	1.73	1.73	9	1	1.73	CPG9.20	58752343	Bwet	WREC	2016-08-23	Preflower_during_recovery	5.95535	T
S09_58757504	2.81	1.12	9	4	1.48	CPG9.20	58757504	Bwet, H_m, B65	WREC	2016-08-09, 2016-07-06, 2016-08-23	Postflower_no_stress, control, Preflower_during_recovery	8.61021	T
S09_58761955	1.7	1.7	9	1	1.7	CPG9.20	58761955	Bwet	WREC	2016-08-23	Preflower_during_recovery	2.6883	T
S09_58763903	3.08	3.08	9	1	3.08	CPG9.20	58763903	Bwet	WREC	2016-08-23	Preflower_during_recovery	9.79633	T
S09_58771060	5.78	1.11	9	4	1.96	CPG9.20	58771060	Bwet, LAI, B65	KARE, WREC	2016-08-30, 2016-08-25, 2016-08-23	Preflower_during_recovery	10.9795	T
S09_58775791	3.19	1.01	9	9	1.36	CPG9.20	58775791	Bwet, H_m, B65	WREC, KARE	2016-09-21, 2016-08-23, 2016-08-30, 2016-09-01	Postflower_during_stress, control, Preflower_during_recovery	11.6586	T
S09_58775824	2.35	1.15	9	6	1.47	CPG9.20	58775824	Bwet, H_m, B65	WREC	2016-08-30, 2016-08-23	Postflower_during_stress, Preflower_during_recovery	9.61232	T
S09_58789302	1.34	1.26	9	2	1.3	CPG9.20	58789302	H_m	WREC	2016-08-30, 2016-08-23	Preflower_during_recovery	7.40848	T
S09_58795206	2.81	1.08	9	5	1.17	CPG9.20	58795206	Bwet, LAI, B65	KARE, WREC	2016-08-09, 2016-08-30, 2016-08-25, 2016-08-23	control, Preflower_during_recovery	8.11786	T
S09_58816032	2.3	1.06	9	2	1.68	CPG9.20	58816032	Bwet, B65	WREC	2016-08-23	Preflower_during_recovery	5.85779	T
S09_58822761	1.98	1.98	9	1	1.98	CPG9.20	58822761	Bwet	WREC	2016-08-23	Preflower_during_recovery	8.36697	T
S09_58822821	2.91	2.91	9	1	2.91	CPG9.20	58822821	Bwet	WREC	2016-08-23	Preflower_during_recovery	12.1974	T
S09_58824219	1.21	1.21	9	1	1.21	CPG9.20	58824219	Bwet	WREC	2016-08-30	Preflower_during_recovery	3.60457	T
S09_58831601	1.79	1.14	9	2	1.47	CPG9.20	58831601	Bwet	WREC	2016-08-09, 2016-08-23	control, Preflower_during_recovery	3.19403	T
S09_58831610	1.79	1.14	9	2	1.47	CPG9.20	58831610	Bwet	WREC	2016-08-09, 2016-08-23	control, Preflower_during_recovery	3.19403	T
S09_58837819	1.04	1.04	9	1	1.04	CPG9.20	58837819	H_m	KARE	2016-07-14	control	3.66947	T
S09_58841791	1.36	1.02	9	4	1.05	CPG9.20	58841791	Bwet, LAI, B65	WREC, KARE	2016-08-23, 2016-08-25, 2016-09-01	Preflower_during_recovery	2.86988	T
S09_58841852	1.68	1.27	9	3	1.65	CPG9.20	58841852	Bwet, B65	WREC	2016-08-30, 2016-08-23	Preflower_during_recovery	2.50314	T
S09_58843515	2.95	1.23	9	7	1.59	CPG9.20	58843515	Bwet, LAI, H_m, B65	KARE, WREC	2016-07-12, 2016-07-06, 2016-08-30, 2016-08-25, 2016-08-23	Postflower_no_stress, control, Preflower_during_recovery	7.02375	T
S09_58869063	1.19	1.19	9	1	1.19	CPG9.20	58869063	B65	WREC	2016-08-09	Postflower_during_stress	4.22971	T
S09_58871601	3.49	1.1	9	10	1.46	CPG9.20	58871601	Bwet, H_m, B65	WREC	2016-08-09, 2016-07-06, 2016-07-12, 2016-08-23, 2016-07-26, 2016-08-02, 2016-08-30, 2016-07-22	Preflower_during_stress, Postflower_no_stress, control, Preflower_during_recovery	6.79856	T
S09_58880242	1.52	1.47	9	2	1.49	CPG9.20	58880242	H_m	WREC	2016-07-06, 2016-07-12	Postflower_no_stress	4.72703	T
S09_58880878	4.46	1.04	9	14	1.45	CPG9.20	58880878	Bwet, LAI, H_m, B65	WREC, KARE	2016-09-01, 2016-08-09, 2016-08-25, 2016-07-06, 2016-07-12, 2016-08-23, 2016-07-26, 2016-08-02, 2016-08-30, 2016-07-22	Postflower_during_stress, Postflower_no_stress, Preflower_during_stress, control, Preflower_during_recovery	7.53011	T
S09_58887751	1.05	1.05	9	1	1.05	CPG9.20	58887751	Bwet	WREC	2016-08-23	Preflower_during_recovery	1.84596	T
S09_58906356	3.25	1.03	9	9	1.53	CPG9.20	58906356	Bwet, LAI, H_m, B65	KARE, WREC	2016-08-09, 2016-08-25, 2016-07-06, 2016-08-23, 2016-08-02, 2016-08-30	Postflower_no_stress, control, Preflower_during_recovery	8.50725	T
S09_58914472	1.44	1.13	9	2	1.29	CPG9.20	58914472	Bwet	WREC	2016-08-02, 2016-08-23	Preflower_during_recovery	2.67031	T
S09_58916303	4.27	1.04	9	5	1.86	CPG9.20	58916303	Bwet, H_m, B65	WREC	2016-08-16, 2016-08-30, 2016-08-23	Postflower_during_stress, Preflower_during_recovery	9.94504	T
S09_58916305	5	1.03	9	8	1.62	CPG9.20	58916305	Bwet, H_m, B65	WREC	2016-08-16, 2016-08-30, 2016-08-23	Postflower_during_stress, Preflower_during_recovery	9.55788	T
S09_58916306	5	1.03	9	8	1.62	CPG9.20	58916306	Bwet, H_m, B65	WREC	2016-08-16, 2016-08-30, 2016-08-23	Postflower_during_stress, Preflower_during_recovery	9.55788	T
S09_58916307	5	1.03	9	8	1.62	CPG9.20	58916307	Bwet, H_m, B65	WREC	2016-08-16, 2016-08-30, 2016-08-23	Postflower_during_stress, Preflower_during_recovery	9.55788	T
S09_58918742	2.13	1.09	9	5	1.4	CPG9.20	58918742	LAI, H_m, B65	WREC	2016-08-09, 2016-08-02, 2016-07-22, 2016-07-26	Preflower_during_stress, Preflower_during_recovery	0.407084	T
S09_58918774	1.55	1.15	9	2	1.35	CPG9.20	58918774	B65	WREC	2016-08-02, 2016-07-26	Preflower_during_stress, Preflower_during_recovery	4.46288	T
S09_58918776	1.55	1.15	9	2	1.35	CPG9.20	58918776	B65	WREC	2016-08-02, 2016-07-26	Preflower_during_stress, Preflower_during_recovery	4.46288	T
S09_58918803	2.13	1.02	9	7	1.45	CPG9.20	58918803	Bwet, LAI, H_m, B65	WREC	2016-07-12, 2016-07-22, 2016-07-26	Preflower_during_stress	1.29401	T
S09_58923588	1.2	1.2	9	1	1.2	CPG9.20	58923588	H_m	WREC	2016-07-06	Postflower_no_stress	6.34084	T
S09_58923734	1.85	1.85	9	1	1.85	CPG9.20	58923734	H_m	WREC	2016-07-06	Postflower_no_stress	6.5165	T
S09_58933338	1.16	1.05	9	3	1.11	CPG9.20	58933338	Bwet, H_m, B65	WREC	2016-08-16	Postflower_during_stress	9.63831	T
S09_58935184	1.99	1.12	9	2	1.56	CPG9.20	58935184	Bwet	WREC	2016-08-23	Preflower_during_recovery	7.13242	T
S09_58967708	1.16	1.16	9	1	1.16	CPG9.20	58967708	Bwet	WREC	2016-08-23	Preflower_during_recovery	4.03756	T
S09_58981289	1.88	1.88	9	1	1.88	CPG9.20	58981289	H_m	KARE	2016-07-07	control	4.75349	T
S09_58983492	1	1	9	1	1	CPG9.21	58983492	LAI	KARE	2016-08-25	Preflower_during_recovery	2.46737	T
S09_59009687	1.15	1.15	9	1	1.15	CPG9.21	59009687	Bwet	WREC	2016-08-23	Preflower_during_recovery	3.07898	T
S09_59010226	1.23	1.23	9	1	1.23	CPG9.21	59010226	LAI	KARE	2016-08-25	Preflower_during_recovery	4.49552	T
S09_59010241	1.66	1.23	9	2	1.45	CPG9.21	59010241	Bwet, LAI	WREC, KARE	2016-08-25, 2016-08-23	Preflower_during_recovery	4.94898	T
S09_59075924	2.13	1.09	9	6	1.58	CPG9.21	59075924	Bwet, H_m, B65	WREC	2016-07-06, 2016-07-12, 2016-08-23, 2016-07-26, 2016-08-30, 2016-07-22	Preflower_during_stress, Postflower_no_stress, Preflower_during_recovery	4.70649	T
S09_59082545	1.62	1.62	9	1	1.62	CPG9.21	59082545	H_m	WREC	2016-07-06	Postflower_no_stress	4.6999	T
S09_59090384	1.65	1.59	9	2	1.62	CPG9.21	59090384	H_m	WREC	2016-07-06	Postflower_no_stress, control	2.46003	T
S09_59107199	1.51	1.51	9	1	1.51	CPG9.21	59107199	H_m	WREC	2016-07-06	Postflower_no_stress	3.89403	T
S09_59107201	1.51	1.51	9	1	1.51	CPG9.21	59107201	H_m	WREC	2016-07-06	Postflower_no_stress	3.89403	T
S09_59131283	1.52	1.52	9	1	1.52	CPG9.21	59131283	H_m	WREC	2016-07-06	Postflower_no_stress	4.23549	T
S09_59132241	1.94	1.94	9	1	1.94	CPG9.21	59132241	Bwet	WREC	2016-08-23	Preflower_during_recovery	2.22328	T
S09_59132487	1.02	1.02	9	1	1.02	CPG9.21	59132487	H_m	WREC	2016-07-06	Postflower_no_stress	2.82649	T
S09_59133828	1.26	1.07	9	3	1.11	CPG9.21	59133828	Bwet, LAI	WREC, KARE	2016-09-21, 2016-08-16	Postflower_during_stress, Preflower_during_recovery	5.3196	T
S09_59139101	1.21	1.21	9	1	1.21	CPG9.21	59139101	Bwet	WREC	2016-08-23	Preflower_during_recovery	4.90559	T
S09_59155260	1.05	1.05	9	1	1.05	CPG9.21	59155260	B65	KARE	2016-07-28	Preflower_during_recovery	0.551874	T
S09_59155261	1.05	1.05	9	1	1.05	CPG9.21	59155261	B65	KARE	2016-07-28	Preflower_during_recovery	0.551874	T
S09_59160522	3.4	1.1	9	9	1.51	CPG9.21	59160522	Bwet, H_m, B65	WREC	2016-08-09, 2016-07-06, 2016-08-23, 2016-07-26, 2016-08-02, 2016-08-30, 2016-07-22	Preflower_during_stress, control, Preflower_during_recovery	7.02885	T
S09_59160604	1.92	1	9	15	1.43	CPG9.21	59160604	Bwet, LAI, H_m, B65	KARE, WREC	2016-07-07, 2016-08-09, 2016-07-28, 2016-09-06, 2016-08-18, 2016-07-12, 2016-08-30, 2016-07-22	Postflower_during_stress, Postflower_no_stress, control, Preflower_during_recovery	9.75604	T
S09_59160864	1.83	1.2	9	5	1.45	CPG9.21	59160864	Bwet, B65	WREC	2016-08-02, 2016-07-22, 2016-08-30, 2016-08-23, 2016-07-26	Preflower_during_stress, Preflower_during_recovery	3.41292	T
S09_59169357	5.02	1.05	9	14	1.77	CPG9.21	59169357	Bwet, LAI, H_m, B65	KARE, WREC	2016-08-09, 2016-08-25, 2016-09-06, 2016-07-06, 2016-07-12, 2016-08-23, 2016-07-26, 2016-08-02, 2016-08-30, 2016-07-22	Preflower_during_stress, Postflower_no_stress, control, Preflower_during_recovery	7.89845	T
S09_59169408	1.61	1.61	9	1	1.61	CPG9.21	59169408	Bwet	WREC	2016-08-23	Preflower_during_recovery	11.4529	T
S09_59173027	3.4	1	9	12	1.78	CPG9.21	59173027	Bwet, LAI, H_m, B65	KARE, WREC	2016-08-09, 2016-08-25, 2016-07-06, 2016-08-23, 2016-07-26, 2016-08-02, 2016-08-30, 2016-07-22	Preflower_during_stress, Postflower_no_stress, control, Preflower_during_recovery	7.48406	T
S09_59174980	1.82	1.58	9	3	1.79	CPG9.21	59174980	Bwet, LAI, B65	KARE	2016-07-07	Postflower_no_stress	8.56323	T
S09_59182286	1.19	1.19	9	1	1.19	CPG9.21	59182286	H_m	KARE	2016-09-01	control	1.23223	T
S09_59189950	1.65	1.18	9	3	1.24	CPG9.21	59189950	Bwet, B65	WREC, KARE	2016-08-18, 2016-08-23, 2016-07-28	control, Preflower_during_recovery	9.83776	T
S09_59191238	1.64	1.15	9	2	1.4	CPG9.21	59191238	Bwet	WREC	2016-08-02, 2016-08-23	Preflower_during_recovery	6.29603	T
S09_59196905	1.48	1.47	9	2	1.48	CPG9.21	59196905	Bwet, B65	WREC	2016-08-02	Preflower_during_recovery	6.12037	T
S09_59200977	1.07	1.04	9	2	1.06	CPG9.21	59200977	Bwet	WREC	2016-08-16, 2016-08-23	Postflower_during_stress, Preflower_during_recovery	7.00346	T
S09_59201859	1.44	1.44	9	1	1.44	CPG9.21	59201859	Bwet	WREC	2016-08-23	Preflower_during_recovery	7.87119	T
S09_59207654	2.09	1.15	9	2	1.62	CPG9.21	59207654	Bwet	WREC	2016-08-02, 2016-08-23	Preflower_during_recovery	6.57856	T
S09_59207859	1.96	1.96	9	1	1.96	CPG9.21	59207859	Bwet	WREC	2016-08-23	Preflower_during_recovery	8.15617	T
S09_59207864	1.61	1.12	9	2	1.37	CPG9.21	59207864	Bwet	WREC	2016-08-23	Preflower_during_recovery	10.1282	T
S09_59207929	2.22	1.15	9	2	1.69	CPG9.21	59207929	Bwet	WREC	2016-08-02, 2016-08-23	Preflower_during_recovery	6.93066	T
S09_59208007	2.26	1.13	9	2	1.7	CPG9.21	59208007	Bwet, B65	WREC	2016-08-23	Preflower_during_recovery	9.41512	T
S09_59208016	2.26	1.13	9	2	1.7	CPG9.21	59208016	Bwet, B65	WREC	2016-08-23	Preflower_during_recovery	9.41512	T
S09_59208060	2.2	1.05	9	2	1.62	CPG9.21	59208060	Bwet	WREC	2016-08-02, 2016-08-23	Preflower_during_recovery	5.7255	T
S09_59208142	2.67	1.15	9	3	1.21	CPG9.21	59208142	Bwet, B65	WREC	2016-08-02, 2016-08-23	Preflower_during_recovery	7.26338	T
S09_59208156	2.67	1.15	9	3	1.21	CPG9.21	59208156	Bwet, B65	WREC	2016-08-02, 2016-08-23	Preflower_during_recovery	7.26338	T
S09_59208166	2.67	1.15	9	3	1.21	CPG9.21	59208166	Bwet, B65	WREC	2016-08-02, 2016-08-23	Preflower_during_recovery	7.26338	T
S09_59208307	1.23	1.04	9	3	1.07	CPG9.21	59208307	Bwet, LAI	KARE	2016-08-11, 2016-09-08, 2016-09-01	Preflower_during_recovery	2.33151	T
S09_59218143	2.39	1.01	9	3	1.15	CPG9.21	59218143	Bwet, B65	WREC	2016-08-02, 2016-08-23	Preflower_during_recovery	7.2295	T
S09_59219291	3.08	1.13	9	3	1.63	CPG9.21	59219291	Bwet	WREC	2016-08-30, 2016-08-23	Preflower_during_recovery	7.31283	T
S09_59221771	2.05	1.09	9	2	1.57	CPG9.21	59221771	Bwet	WREC	2016-08-02, 2016-08-23	Preflower_during_recovery	6.79846	T
S09_59221830	2.22	1.01	9	2	1.61	CPG9.21	59221830	Bwet, B65	WREC	2016-08-23	Preflower_during_recovery	10.6854	T
S09_59223604	1.94	1.07	9	7	1.4	CPG9.21	59223604	Bwet, H_m, B65	WREC	2016-08-02, 2016-07-22, 2016-08-23, 2016-07-26	Preflower_during_stress, Preflower_during_recovery	7.43463	T
S09_59223615	1.94	1.07	9	7	1.4	CPG9.21	59223615	Bwet, H_m, B65	WREC	2016-08-02, 2016-07-22, 2016-08-23, 2016-07-26	Preflower_during_stress, Preflower_during_recovery	7.43463	T
S09_59225616	1.98	1.11	9	4	1.54	CPG9.21	59225616	Bwet, B65	WREC	2016-08-16	Postflower_during_stress, control	6.45823	T
S09_59225719	1.02	1.02	9	1	1.02	CPG9.21	59225719	Bwet	WREC	2016-08-23	Preflower_during_recovery	9.07337	T
S09_59226682	2.59	1.23	9	3	1.43	CPG9.21	59226682	Bwet, LAI, B65	WREC, KARE	2016-08-25, 2016-08-23	Preflower_during_recovery	9.35818	T
S09_59234307	1.63	1.09	9	3	1.27	CPG9.21	59234307	Bwet, B65	WREC	2016-08-16	control, Preflower_during_recovery	6.23023	T
S09_59235440	1.52	1.52	9	1	1.52	CPG9.21	59235440	H_m	WREC	2016-07-06	Postflower_no_stress	3.84501	T
S09_59235441	1.52	1.52	9	1	1.52	CPG9.21	59235441	H_m	WREC	2016-07-06	Postflower_no_stress	4.38339	T
S09_59235446	1.65	1.1	9	2	1.37	CPG9.21	59235446	H_m	WREC	2016-07-06, 2016-07-12	Postflower_no_stress	6.53377	T
S09_59252878	1.36	1.36	9	1	1.36	CPG9.21	59252878	Bwet	WREC	2016-08-23	Preflower_during_recovery	8.10386	T
S09_59253161	1.33	1.04	9	2	1.18	CPG9.21	59253161	Bwet	WREC, KARE	2016-09-06, 2016-08-18	control, Preflower_during_recovery	7.68446	T
S09_59264256	1.52	1.52	9	1	1.52	CPG9.21	59264256	H_m	WREC	2016-07-06	Postflower_no_stress	7.62298	T
S09_59266592	1.57	1.57	9	1	1.57	CPG9.21	59266592	Bwet	WREC	2016-08-23	Preflower_during_recovery	2.55505	T
S09_59271394	1.46	1.46	9	1	1.46	CPG9.21	59271394	Bwet	WREC	2016-08-23	Preflower_during_recovery	3.2625	T
S09_59271442	1.46	1.46	9	1	1.46	CPG9.21	59271442	Bwet	WREC	2016-08-23	Preflower_during_recovery	3.2625	T
S09_59291952	1.76	1.76	9	1	1.76	CPG9.21	59291952	Bwet	WREC	2016-08-23	Preflower_during_recovery	5.81538	T
S09_59293134	1.52	1.02	9	2	1.27	CPG9.21	59293134	Bwet, H_m	WREC	2016-07-06, 2016-08-23	Postflower_no_stress, Preflower_during_recovery	5.54091	T
S09_59295001	1.12	1.12	9	1	1.12	CPG9.21	59295001	H_m	WREC	2016-07-06	Postflower_no_stress	9.38837	T
S09_59311630	1.21	1.21	9	1	1.21	CPG9.21	59311630	B65	WREC	2016-08-16	control	8.62031	T
S09_59321955	1.39	1.07	9	3	1.11	CPG9.21	59321955	Bwet, B65	KARE	2016-07-22, 2016-07-28	Preflower_during_recovery	2.12353	T
S09_59323827	1.07	1.07	9	1	1.07	CPG9.21	59323827	H_m	WREC	2016-09-13	Preflower_during_recovery	5.28374	T
S09_59327526	1.52	1.18	9	2	1.35	CPG9.21	59327526	Bwet, H_m	WREC	2016-07-06, 2016-08-23	Postflower_no_stress, Preflower_during_recovery	6.77316	T
S09_59340658	1.73	1.73	9	1	1.73	CPG9.21	59340658	Bwet	WREC	2016-08-23	Preflower_during_recovery	5.19834	T
S09_59361558	2.43	1.21	9	2	1.82	CPG9.21	59361558	Bwet	WREC	2016-08-30, 2016-08-23	Preflower_during_recovery	8.29246	T
S10_75758	1.03709	1.03709	10	1	1.03709	CPG10.1	75758	B65	KARE	2016-07-22	Preflower_during_recovery	1.90721
S10_290422	2.6771	1.3377	10	4	1.92119	CPG10.1	290422	H_m, B65	WREC	2016-07-22, 2016-07-26	Postflower_no_stress, control	3.08415
S10_290441	2.63283	1.23617	10	4	1.88465	CPG10.1	290441	H_m, B65	WREC	2016-07-22, 2016-07-26	Postflower_no_stress, control	2.81106
S10_302416	2.76167	1.24951	10	4	2.08207	CPG10.1	302416	H_m, B65	WREC	2016-07-22, 2016-07-26	Postflower_no_stress, control	3.0887
S10_337573	1.82182	1.80894	10	2	1.81538	CPG10.1	337573	H_m	WREC	2016-07-22, 2016-07-26	Postflower_no_stress	4.3921
S10_337581	1.82182	1.80894	10	2	1.81538	CPG10.1	337581	H_m	WREC	2016-07-22, 2016-07-26	Postflower_no_stress	4.3921
S10_363008	1.90683	1.12621	10	2	1.51652	CPG10.1	363008	H_m	WREC	2016-07-22, 2016-07-26	Postflower_no_stress	3.9583
S10_365317	1.48617	1.25023	10	2	1.3682	CPG10.1	365317	H_m	WREC	2016-07-22, 2016-07-26	Postflower_no_stress	3.20079
S10_368143	1.10264	1.10264	10	1	1.10264	CPG10.1	368143	H_m	WREC	2016-07-22	Postflower_no_stress	3.12793
S10_370473	1.05184	1.05184	10	1	1.05184	CPG10.1	370473	H_m	KARE	2016-08-18	Preflower_during_recovery	2.38744
S10_370793	1.48617	1.25023	10	2	1.3682	CPG10.1	370793	H_m	WREC	2016-07-22, 2016-07-26	Postflower_no_stress	3.20079
S10_370877	1.41493	1.16827	10	2	1.2916	CPG10.1	370877	H_m	WREC	2016-07-22, 2016-07-26	Postflower_no_stress	2.97738
S10_415474	2.76167	1.24951	10	4	2.08207	CPG10.1	415474	H_m, B65	WREC	2016-07-22, 2016-07-26	Postflower_no_stress, control	3.0887
S10_416268	1.6812	1.00206	10	4	1.34803	CPG10.1	416268	H_m, B65	WREC	2016-08-09, 2016-07-22, 2016-07-26	Postflower_no_stress, control	3.32155
S10_552762	1.65691	1.03148	10	2	1.3442	CPG10.1	552762	B65	WREC	2016-08-16, 2016-08-09	Postflower_during_stress, control	5.03629
S10_597845	1.02155	1.02155	10	1	1.02155	CPG10.2	597845	B65	WREC	2016-08-16	Preflower_during_recovery	0.566359	T
S10_764106	2.37277	1.01699	10	7	1.61558	CPG10.2	764106	Bwet, H_m, B65	WREC, KARE	2016-09-06, 2016-08-30, 2016-09-01	Preflower_during_recovery	4.435	T
S10_845888	1.75772	1.12616	10	5	1.45069	CPG10.2	845888	H_m, B65	WREC	2016-09-20, 2016-08-30, 2016-09-13	Preflower_during_recovery	7.2311	T
S10_845908	1.75772	1.12616	10	5	1.45069	CPG10.2	845908	H_m, B65	WREC	2016-09-20, 2016-08-30, 2016-09-13	Preflower_during_recovery	7.2311	T
S10_893449	1.03656	1.03656	10	1	1.03656	CPG10.2	893449	B65	WREC	2016-08-30	Preflower_during_recovery	5.77814	T
S10_954226	1.0267	1.0267	10	1	1.0267	CPG10.2	954226	B65	WREC	2016-09-06	Preflower_during_recovery	1.83808	T
S10_965421	1.28322	1.28322	10	1	1.28322	CPG10.2	965421	B65	WREC	2016-09-06	Preflower_during_recovery	2.44334	T
S10_1244065	1.1998	1.07817	10	2	1.13899	CPG10.3	1244065	Bwet, B65	WREC	2016-08-23	Preflower_during_recovery	3.41209
S10_1244072	1.1998	1.07817	10	2	1.13899	CPG10.3	1244072	Bwet, B65	WREC	2016-08-23	Preflower_during_recovery	3.41209
S10_2762830	1.15897	1.07772	10	2	1.11835	CPG10.4	2762830	Bwet, B65	WREC	2016-07-22, 2016-07-26	Preflower_during_stress	5.47641
S10_3002568	1.63659	1.08665	10	16	1.20849	CPG10.4	3002568	Bwet, LAI, H_m, B65	WREC	2016-09-13, 2016-08-09, 2016-08-23, 2016-07-26, 2016-08-02, 2016-08-30, 2016-07-22	Postflower_during_stress, Postflower_no_stress, control	3.24269
S10_3002584	1.63659	1.08665	10	16	1.20849	CPG10.4	3002584	Bwet, LAI, H_m, B65	WREC	2016-09-13, 2016-08-09, 2016-08-23, 2016-07-26, 2016-08-02, 2016-08-30, 2016-07-22	Postflower_during_stress, Postflower_no_stress, control	3.24269
S10_3137049	1.41314	1.00213	10	5	1.0905	CPG10.4	3137049	Bwet, LAI, B65	WREC	2016-08-09, 2016-07-22, 2016-07-26	Preflower_during_stress, control, Preflower_during_recovery	7.37639
S10_3137075	1.41314	1.00213	10	5	1.0905	CPG10.4	3137075	Bwet, LAI, B65	WREC	2016-08-09, 2016-07-22, 2016-07-26	Preflower_during_stress, control, Preflower_during_recovery	7.37639
S10_3169867	3.076	1.01218	10	34	1.43842	CPG10.4	3169867	Bwet, LAI, H_m, B65	KARE, WREC	2016-09-01, 2016-09-13, 2016-09-15, 2016-08-11, 2016-09-20, 2016-08-09, 2016-08-25, 2016-09-21, 2016-09-06, 2016-08-18, 2016-09-08, 2016-08-23, 2016-07-26, 2016-08-30, 2016-07-22	Postflower_during_stress, Preflower_during_stress, control, Preflower_during_recovery	6.89772
S10_3177682	1.00881	1.00881	10	1	1.00881	CPG10.4	3177682	H_m	KARE	2016-09-21	Preflower_during_recovery	7.43089
S10_3456638	2.49334	1.2436	10	8	1.80001	CPG10.4	3456638	Bwet, LAI, H_m, B65	WREC	2016-07-12, 2016-07-22, 2016-07-26	Preflower_during_stress	6.21213
S10_3567069	1.30331	1.30331	10	1	1.30331	CPG10.4	3567069	Bwet	WREC	2016-08-23	Preflower_during_recovery	3.89924
S10_3613805	3.28765	1.00899	10	16	1.19277	CPG10.4	3613805	Bwet, H_m, B65	KARE, WREC	2016-09-13, 2016-09-15, 2016-08-09, 2016-08-25, 2016-09-21, 2016-09-08, 2016-08-23, 2016-08-30	Postflower_during_stress, control, Preflower_during_recovery	4.13847
S10_4058978	1.47366	1.07811	10	4	1.22816	CPG10.6	4058978	H_m, B65	WREC	2016-09-20, 2016-08-23	Preflower_during_recovery	3.68103
S10_4178234	1.08966	1.08966	10	1	1.08966	CPG10.6	4178234	Bwet	KARE	2016-08-11	Postflower_during_stress	2.25226
S10_4240848	1.15325	1.15325	10	1	1.15325	CPG10.6	4240848	Bwet	WREC	2016-08-02	Preflower_during_recovery	1.12165
S10_5402285	1.05814	1.05814	10	1	1.05814	CPG10.8	5402285	H_m	WREC	2016-09-13	Preflower_during_recovery	4.86001
S10_5869141	1.03233	1.03233	10	1	1.03233	CPG10.8	5869141	B65	WREC	2016-08-23	Preflower_during_recovery	1.6892
S10_5882902	1.78172	1.11965	10	6	1.33202	CPG10.8	5882902	Bwet, H_m, B65	WREC	2016-08-16, 2016-08-02, 2016-07-22, 2016-07-26	Postflower_during_stress, Postflower_no_stress	2.12574
S10_5972613	2.51466	1.15611	10	5	1.47058	CPG10.8	5972613	H_m	WREC	2016-09-20, 2016-08-23	Preflower_during_recovery	6.22546
S10_5972834	1.95423	1.11778	10	2	1.53601	CPG10.8	5972834	B65	WREC	2016-09-06	Preflower_during_recovery	6.02729
S10_6133490	1.18212	1.18212	10	1	1.18212	CPG10.8	6133490	H_m	KARE	2016-08-25	control	1.56546
S10_6133496	1.18212	1.18212	10	1	1.18212	CPG10.8	6133496	H_m	KARE	2016-08-25	control	1.56546
S10_6202540	1.67538	1.29637	10	2	1.48587	CPG10.8	6202540	Bwet, B65	WREC	2016-07-12	control	0.0712547
S10_6318056	1.04135	1.04135	10	1	1.04135	CPG10.8	6318056	H_m	WREC	2016-07-22	control	1.42811
S10_6504633	1.44436	1.05291	10	2	1.24863	CPG10.8	6504633	Bwet, B65	WREC	2016-08-23	Preflower_during_recovery	2.87108
S10_6805875	1.17261	1.17261	10	1	1.17261	CPG10.9	6805875	B65	WREC	2016-07-12	control	0.0254084
S10_7024713	1.09072	1.09072	10	1	1.09072	CPG10.9	7024713	Bwet	KARE	2016-09-01	Postflower_during_stress	1.12954
S10_7236537	1.21346	1.02129	10	4	1.12982	CPG10.9	7236537	H_m, B65	WREC, KARE	2016-08-16, 2016-09-08, 2016-08-25	Postflower_during_stress, control	2.04706
S10_7393183	1.26931	1.04333	10	2	1.15632	CPG10.9	7393183	Bwet, B65	WREC	2016-08-23	Preflower_during_recovery	2.576
S10_7393213	1.26931	1.04333	10	2	1.15632	CPG10.9	7393213	Bwet, B65	WREC	2016-08-23	Preflower_during_recovery	2.576
S10_8863935	2.9734	1.01269	10	14	1.33182	CPG10.11	8863935	H_m, B65	KARE, WREC	2016-08-16, 2016-08-11, 2016-09-13, 2016-07-28, 2016-09-06, 2016-08-18, 2016-08-23, 2016-07-22	control, Preflower_during_recovery	5.93774
S10_8863974	2.9734	1.01269	10	14	1.33182	CPG10.11	8863974	H_m, B65	KARE, WREC	2016-08-16, 2016-08-11, 2016-09-13, 2016-07-28, 2016-09-06, 2016-08-18, 2016-08-23, 2016-07-22	control, Preflower_during_recovery	5.93774
S10_15424458	1.31976	1.31976	10	1	1.31976	CPG10.13	15424458	B65	WREC	2016-08-16	Postflower_during_stress	2.3665
S10_15424502	1.08641	1.08641	10	1	1.08641	CPG10.13	15424502	B65	WREC	2016-08-16	Postflower_during_stress	2.35325
S10_17585641	1.66951	1.30628	10	3	1.60696	CPG10.14	17585641	Bwet, B65	KARE	2016-08-25	Preflower_during_recovery	2.14347
S10_17625896	2.76002	1.04623	10	17	1.81633	CPG10.14	17625896	Bwet, H_m, B65	KARE, WREC	2016-08-16, 2016-08-11, 2016-09-20, 2016-09-06, 2016-08-18, 2016-08-30	control, Preflower_during_recovery	0.962183
S10_55544982	1.80031	1.80031	10	1	1.80031	CPG10.15	55544982	Bwet	WREC	2016-08-23	Preflower_during_recovery	5.11381
S10_55572826	1.81035	1.07175	10	6	1.37586	CPG10.15	55572826	Bwet, LAI, B65	WREC	2016-07-12, 2016-07-22, 2016-07-26	Preflower_during_stress	13.0396
S10_55587076	2.04767	1.047	10	8	1.23499	CPG10.15	55587076	Bwet, LAI, B65	KARE, WREC	2016-09-21, 2016-07-12, 2016-07-22, 2016-07-26	Preflower_during_stress, Postflower_during_stress	6.79449
S10_55673246	1.25997	1.25997	10	1	1.25997	CPG10.15	55673246	Bwet	WREC	2016-08-23	Preflower_during_recovery	0.059903
S10_55679961	1.57877	1.43178	10	2	1.50527	CPG10.15	55679961	Bwet, B65	WREC	2016-08-23	Preflower_during_recovery	2.51451
S10_56120381	1.13957	1.13957	10	1	1.13957	CPG10.16	56120381	H_m	KARE	2016-09-15	Postflower_during_stress	2.18236
S10_56251001	1.04801	1.04801	10	1	1.04801	CPG10.17	56251001	H_m	KARE	2016-08-18	control	7.4866
S10_56290782	2.01598	1.22892	10	2	1.62245	CPG10.17	56290782	Bwet, B65	WREC	2016-08-16	Postflower_during_stress	2.75879
S10_56389495	1.12331	1.12331	10	1	1.12331	CPG10.17	56389495	H_m	KARE	2016-08-18	control	3.16609
S10_56475680	1.95848	1.0532	10	11	1.3295	CPG10.17	56475680	Bwet, H_m, B65	KARE, WREC	2016-08-16, 2016-08-11, 2016-09-13, 2016-09-01, 2016-09-06, 2016-08-18	Postflower_during_stress, control, Preflower_during_recovery	1.66503
S10_56608612	1.32148	1.32148	10	1	1.32148	CPG10.17	56608612	B65	WREC	2016-09-13	Preflower_during_recovery	0.0164237
S10_56687222	1.21346	1.21346	10	1	1.21346	CPG10.17	56687222	H_m	KARE	2016-09-08	Postflower_during_stress	0.0825545
S10_56813250	1.14175	1.14175	10	1	1.14175	CPG10.17	56813250	Bwet	WREC	2016-08-23	Preflower_during_recovery	1.40897
S10_57108908	1.77197	1.02768	10	7	1.13452	CPG10.18	57108908	Bwet, B65	WREC, KARE	2016-08-02, 2016-08-11, 2016-08-25, 2016-09-01	Postflower_during_stress, control	1.61753
S10_57118022	1.09072	1.09072	10	1	1.09072	CPG10.18	57118022	Bwet	KARE	2016-09-01	Postflower_during_stress	1.99719
S10_57196859	1.32104	1.32104	10	1	1.32104	CPG10.18	57196859	B65	KARE	2016-09-01	Preflower_during_recovery	2.95073
S10_57196864	1.32104	1.32104	10	1	1.32104	CPG10.18	57196864	B65	KARE	2016-09-01	Preflower_during_recovery	2.95073
S10_57196866	1.32104	1.32104	10	1	1.32104	CPG10.18	57196866	B65	KARE	2016-09-01	Preflower_during_recovery	2.95073
S10_57283431	1.03621	1.03621	10	1	1.03621	CPG10.18	57283431	B65	WREC	2016-09-13	Preflower_during_recovery	2.41389
S10_57512453	1.09456	1.09456	10	1	1.09456	CPG10.18	57512453	B65	WREC	2016-08-02	Preflower_during_recovery	3.6861
S10_57512456	1.09456	1.09456	10	1	1.09456	CPG10.18	57512456	B65	WREC	2016-08-02	Preflower_during_recovery	3.6861
S10_57512818	1.48249	1.0129	10	11	1.13056	CPG10.18	57512818	Bwet, H_m, B65	WREC, KARE	2016-09-01, 2016-09-06, 2016-07-12, 2016-08-23, 2016-07-26, 2016-08-02, 2016-08-30, 2016-07-22	Preflower_during_stress, control, Preflower_during_recovery	5.42626
S10_57642600	1.07734	1.07734	10	1	1.07734	CPG10.19	57642600	B65	WREC	2016-08-30	Preflower_during_recovery	2.58265
S10_57692330	1.47984	1.19683	10	4	1.33424	CPG10.19	57692330	Bwet, LAI, B65	WREC, KARE	2016-09-21, 2016-08-23	Postflower_during_stress, Preflower_during_recovery	5.12229	T
S10_57771735	1.0872	1.0872	10	1	1.0872	CPG10.19	57771735	B65	WREC	2016-08-09	Postflower_during_stress	5.47518	T
S10_57879210	2.39181	1.63767	10	2	2.01474	CPG10.19	57879210	Bwet, B65	WREC	2016-08-23	Preflower_during_recovery	3.77752	T
S10_57937375	1.58927	1.58927	10	1	1.58927	CPG10.19	57937375	B65	KARE	2016-07-28	Preflower_during_recovery	5.93952	T
S10_58016397	1.55451	1.0113	10	2	1.2829	CPG10.19	58016397	B65	WREC	2016-08-09, 2016-08-30	Postflower_during_stress, Preflower_during_recovery	5.74346	T
S10_58191038	1.01818	1.01818	10	1	1.01818	CPG10.19	58191038	B65	WREC	2016-07-12	Preflower_during_stress	4.83629	T
S10_58323358	1.13668	1.13668	10	1	1.13668	CPG10.20	58323358	B65	KARE	2016-07-28	Preflower_during_recovery	2.98502
S10_58438192	1.02457	1.02457	10	1	1.02457	CPG10.20	58438192	B65	WREC	2016-08-16	Preflower_during_recovery	4.08259
S10_58532809	1.41997	1.27717	10	3	1.34528	CPG10.20	58532809	Bwet, B65	KARE	2016-09-21, 2016-09-08	control	1.43735
S10_58598537	1.7864	1.05184	10	2	1.41912	CPG10.20	58598537	H_m	KARE	2016-08-18, 2016-08-11	Preflower_during_recovery	1.51214
S10_58624279	1.5535	1.00204	10	9	1.12765	CPG10.20	58624279	Bwet, H_m, B65	WREC, KARE	2016-08-11, 2016-09-01, 2016-08-09, 2016-09-06, 2016-09-08, 2016-07-26, 2016-08-02	Postflower_during_stress, Preflower_during_stress, Preflower_during_recovery	2.35471
S10_58624348	2.06216	1.06505	10	11	1.32968	CPG10.20	58624348	Bwet, H_m, B65	KARE	2016-07-14, 2016-07-22, 2016-07-28	control	8.7589
S10_58624409	1.13532	1.12807	10	2	1.13169	CPG10.20	58624409	B65	KARE	2016-07-22	Postflower_during_stress, control	3.02115
S10_58633820	1.13056	1.13056	10	1	1.13056	CPG10.20	58633820	B65	WREC	2016-08-30	control	1.57416
S10_58767893	1.25877	1.25877	10	1	1.25877	CPG10.20	58767893	Bwet	WREC	2016-08-23	Preflower_during_recovery	1.50654
S10_59583548	1.82351	1.07408	10	6	1.39746	CPG10.21	59583548	Bwet, H_m, B65	KARE	2016-09-21, 2016-09-15, 2016-09-01	Preflower_during_recovery	0.136861
S10_59884179	2.76711	1.04283	10	5	1.62376	CPG10.22	59884179	Bwet, H_m, B65	WREC, KARE	2016-08-16, 2016-09-01, 2016-08-11	Preflower_during_recovery	2.72548
S10_60150968	1.24443	1.24443	10	1	1.24443	CPG10.22	60150968	B65	WREC	2016-08-23	Preflower_during_recovery	5.67254
S10_60738788	1.07284	1.07284	10	1	1.07284	CPG10.23	60738788	Bwet	KARE	2016-09-21	Postflower_during_stress	1.39175
S10_60821477	1.03547	1.03547	10	1	1.03547	CPG10.23	60821477	Bwet	KARE	2016-08-25	Preflower_during_recovery	0.268781
S10_60899869	1.91798	1.09711	10	2	1.50754	CPG10.23	60899869	B65	KARE	2016-07-22, 2016-07-28	Preflower_during_recovery	1.87014
S10_61040263	2.03602	1.04849	10	11	1.21041	CPG10.23	61040263	Bwet, H_m, B65	KARE, WREC	2016-08-09, 2016-08-18, 2016-07-12, 2016-07-26, 2016-08-02, 2016-07-22	Preflower_during_stress, Postflower_during_stress, control, Preflower_during_recovery	7.48454
