# Supplementary material for: Association mapping by aerial drone reveals 213 genetic associations for Sorghum bicolor biomass traits under drought
Source: BMC Genomics. 2018 Sep 17;19:679. doi: 10.1186/s12864-018-5055-5 (PMC6142696; doi:10.1186/s12864-018-5055-5)
Supplement: Supplementary file 14 — Potential evapotranspiration (ETo) and Irrigation water applications by treatment and date ranges in grain sorghum drought response study at the UC Kearney and UC Westside REC sites in 2016. (XLSX 10 kb) [file 12864_2018_5055_MOESM14_ESM.xlsx]

## Sheet: Sheet1
Potential evapotranspiration (ETo) and Irrigation water applications by treatment and date ranges in grain sorghum drought response study at the UC Kearney and UC Westside REC sites in 2016.
				Irrigation Water Applied During Date Range (mm) by treatment
		Potential Evapotranspiration (ETo) during date range shown (mm)
	Date		Rainfall (mm)
Site	Range			Pre-flower Stress	Post-flower stress	Non-water-stressed control
KARE	Pre-plant	-	0	150	150	150
	6/01 to 7/19	350	1	0	314	314
	7/19 to 9/18	368	1	564	0	356
WREC	Pre-plant	-	0	85	85	85
	6/07 to 6/17 post-emerge sprinklers	65	0	89	89	89
	6/17 to 7/28	321	0	0	282	282
	7/28 to 9/20	370	2	448	0	273
